# Supplementary material for: Copper-mediated synthesis of fullerooxazoles from [60]fullerene and N-hydroxybenzimidoyl cyanides
Source: Royal Society of Chemistry journal article supplement (doi:10.1039/d2ob00239f), 2022-01-01
Supplement: d2ob00239f1.pdf [file d2ob00239f1.pdf]

# Electronic Supplementary Information

## Copper-mediated synthesis of fullerooxazoles from [60]fullerene and *N*-hydroxybenzimidoyl cyanides

Qing-Song Liu,<sup>a</sup> Wen-Jie Qiu,<sup>a</sup> Wen-Qiang Lu<sup>a</sup> and Guan-Wu Wang<sup>\*a,b</sup>

<sup>a</sup>Hefei National Laboratory for Physical Sciences at Microscale and Department of Chemistry, University of Science and Technology of China, Hefei, Anhui 230026, P. R. China

E-mail: [gwang@ustc.edu.cn](mailto:gwang@ustc.edu.cn); Fax: +86 551 3607864; Tel: +86 551 3607864

<sup>b</sup>State Key Laboratory of Applied Organic Chemistry, Lanzhou University, Lanzhou, Gansu 730000, P. R. China

### Table of Contents

|                                                                                    |        |
|------------------------------------------------------------------------------------|--------|
| 1. General information                                                             | S2     |
| 2. General procedure for the reaction of C <sub>60</sub> with substrates <b>1</b>  | S2     |
| 3. Synthesis and spectral data of compounds <b>2a–r</b> and <b>3a</b>              | S2–11  |
| 4. Attempted reaction of <b>2a</b> <sup>2-</sup> with MeI or D <sub>2</sub> O      | S12–13 |
| 5. Control experiments                                                             | S13–14 |
| 6. Reaction mechanism leading to fullerisoxazoles                                  | S14    |
| 7. References                                                                      | S15    |
| 8. NMR spectra of compounds <b>2a–r</b> and <b>3a</b>                              | S16–55 |
| 9. UV-vis spectra of compounds <b>2d–f</b> , <b>2k–o</b> , <b>2r</b> and <b>3a</b> | S56–57 |

## 1. General information

Anhydrous 1,2-dichlorobenzene (1,2-C<sub>6</sub>H<sub>4</sub>Cl<sub>2</sub>) was freshly distilled, *N*-hydroxybenzimidoyl cyanides **1a–r** were synthesized by the literature procedure.<sup>1</sup> Other chemicals were purchased from commercial sources and used as received. <sup>1</sup>H NMR and <sup>13</sup>C NMR spectra were recorded on a Bruker ASCEND III–400 or a Bruker ASCEND III–500 or a JEOL JNM-ECZ600R/SI spectrometer at room temperature. <sup>1</sup>H NMR chemical shifts were determined relative to TMS. <sup>13</sup>C NMR chemical shifts were determined relative to TMS or residual DMSO (δ 39.03 ppm). Abbreviations for signal couplings are: s, singlet; d, doublet; t, triplet; m, multiplet. High resolution mass spectra were obtained on a Bruker UltrafleXtreme MALDI-TOF/TOF instrument. UV-vis spectra were obtained on a SHIMADZU UV-3600PLUS instrument. IR spectra were obtained on a Thermo Scientific Nicolet 6700 instrument. Electrochemical reaction was performed under an argon atmosphere at 0 °C using a Shanghai Chenhua CHI630D workstation.

## 2. General procedure for the reaction of C<sub>60</sub> with substrates **1**

A mixture of C<sub>60</sub> (0.05 mmol), **1** (0.15 mmol) (0.25 mmol for **1c**, **1f** and **1m**), CuBr<sub>2</sub> (0.05 mmol) and Na<sub>2</sub>HPO<sub>4</sub> (0.10 mmol) was completely dissolved in anhydrous 1,2-C<sub>6</sub>H<sub>4</sub>Cl<sub>2</sub> (6 mL) and the reaction was performed in a sealed tube. After being stirred in an oil bath at 150 °C (160 °C for **1i**) for 1 h, the resulting solution was evaporated in vacuo and subsequently separated on a silica gel column (300–400 mesh) with carbon disulfide (CS<sub>2</sub>) as the eluent to give recovered C<sub>60</sub> and then the desired products **2**.

Products **2a–c**, **2g–j**, **2p** and **2q** were known compounds, and their spectra were consistent with those reported in the literature.<sup>2a–f</sup>

## 3. Synthesis and spectral data of compounds **2a–r** and **3a**

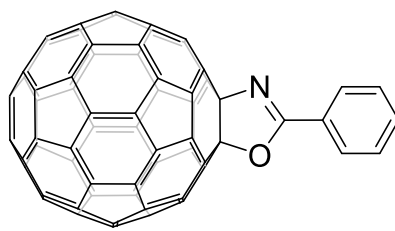

**2a**

**Synthesis and spectral data of 2a:** by following the general procedure, the reaction of C<sub>60</sub> (36.8 mg, 0.05 mmol) with **1a** (21.9 mg, 0.15 mmol), CuBr<sub>2</sub> (11.4 mg, 0.05 mmol) and Na<sub>2</sub>HPO<sub>4</sub> (14.5 mg, 0.10 mmol) at 150 °C for 1 h afforded recovered C<sub>60</sub> (16.8 mg, 46%) and **2a**<sup>2a,c–f</sup> (12.7 mg, 30%): amorphous brown solid; <sup>1</sup>H NMR (400 MHz, CS<sub>2</sub> with DMSO-*d*<sub>6</sub> as the external deuterium lock) δ 8.44–8.37 (m, 2H), 7.70–7.64 (m, 1H), 7.64–7.58 (m, 2H).

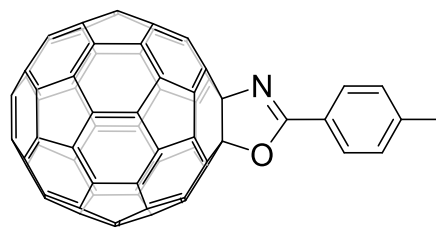

**2b**

**Synthesis and spectral data of 2b:** by following the general procedure, the reaction of C<sub>60</sub> (36.3 mg, 0.05 mmol) with **1b** (24.3 mg, 0.15 mmol), CuBr<sub>2</sub> (11.0 mg, 0.05 mmol) and Na<sub>2</sub>HPO<sub>4</sub> (14.2 mg, 0.10 mmol) at 150 °C for 1 h afforded recovered C<sub>60</sub> (20.9 mg, 58%) and **2b**<sup>2a,e,f</sup> (11.0 mg, 26%): amorphous brown solid; <sup>1</sup>H NMR (400 MHz, 1:1 CS<sub>2</sub>/CDCl<sub>3</sub>) δ 8.35 (d, *J* = 8.0 Hz, 2H), 7.43 (d, *J* = 8.0 Hz, 2H), 2.55 (s, 3H).

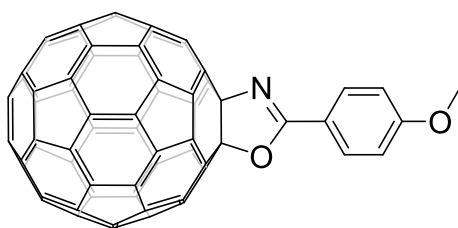

**2c**

**Synthesis and spectral data of 2c:** by following the general procedure, the reaction of C<sub>60</sub> (35.9 mg, 0.05 mmol) with **1c** (44.3 mg, 0.25 mmol), CuBr<sub>2</sub> (11.8 mg, 0.05 mmol) and Na<sub>2</sub>HPO<sub>4</sub> (14.5 mg, 0.10 mmol) at 150 °C for 1 h afforded recovered C<sub>60</sub> (16.9 mg, 47%) and **2c**<sup>2a-f</sup> (10.4 mg, 24%): amorphous brown solid; <sup>1</sup>H NMR (500 MHz, 1:1 CS<sub>2</sub>/CDCl<sub>3</sub>) δ 8.38 (d, *J* = 8.9 Hz, 2H), 7.10 (d, *J* = 8.9 Hz, 2H), 3.96 (s, 3H).

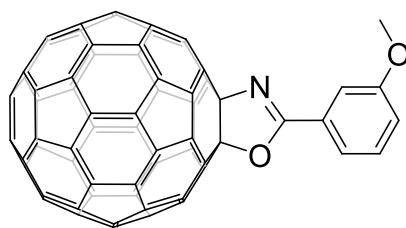

**2d**

**Synthesis and spectral data of 2d:** by following the general procedure, the reaction of C<sub>60</sub> (35.9 mg, 0.05 mmol) with **1d** (26.6 mg, 0.15 mmol), CuBr<sub>2</sub> (11.1 mg, 0.05 mmol) and Na<sub>2</sub>HPO<sub>4</sub> (14.5 mg, 0.10 mmol) at 150 °C for 1 h afforded recovered C<sub>60</sub> (15.2 mg, 42%) and **2d** (9.8 mg, 22%): amorphous brown solid; <sup>1</sup>H NMR (400 MHz, CS<sub>2</sub> with DMSO-*d*<sub>6</sub> as the external deuterium lock) δ 7.96 (d, *J* = 7.6 Hz, 1H), 7.89 (dd, *J* = 2.6, 1.6 Hz, 1H), 7.48 (t, *J* = 7.9 Hz, 1H), 7.15 (ddd, *J* = 8.3, 2.7, 1.0 Hz, 1H), 3.96 (s, 3H); <sup>13</sup>C NMR (101 MHz, CS<sub>2</sub> with DMSO-*d*<sub>6</sub> as the external deuterium lock and reference, all 2C unless indicated) δ 164.40 (1C, C=N), 159.04 (1C, aryl C), 147.55 (1C), 147.49, 147.14 (1C), 145.75 (4C), 145.61, 145.46, 145.40, 145.12, 144.98, 144.83, 144.59, 144.48, 144.22, 143.97, 143.65, 143.02, 142.18, 142.15, 142.07, 141.75 (4C), 141.66, 141.51, 141.39 (4C), 139.85, 139.01, 137.21, 135.51, 129.30 (1C, aryl C), 127.56 (1C,

aryl C), 121.20 (1C, aryl C), 118.85 (1C, aryl C), 112.85 (1C, aryl C), 96.71 (1C, sp<sup>3</sup>-C of C<sub>60</sub>), 91.62 (1C, sp<sup>3</sup>-C of C<sub>60</sub>), 54.64 (1C); FT-IR  $\nu/\text{cm}^{-1}$  (KBr) 1641, 1580, 1512, 1489, 1461, 1431, 1327, 1042, 983, 936, 786, 715, 526; UV-vis (CHCl<sub>3</sub>)  $\lambda_{\text{max}}$  nm (log  $\epsilon$ ) 257 (5.03), 316 (4.56), 418 (3.34), 453 (3.09), 684 (1.97); MALDI-TOF MS  $m/z$  calcd for C<sub>68</sub>H<sub>7</sub>NO<sub>2</sub> [M]<sup>-</sup> 869.0482, found 869.0474.

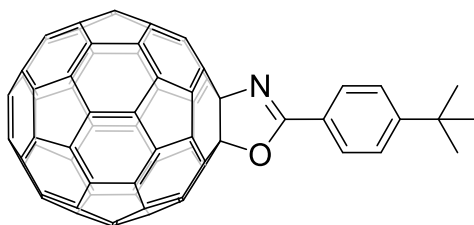

**2e**

**Synthesis and spectral data of 2e:** by following the general procedure, the reaction of C<sub>60</sub> (36.3 mg, 0.05 mmol) with **1e** (30.5 mg, 0.15 mmol), CuBr<sub>2</sub> (11.5 mg, 0.05 mmol) and Na<sub>2</sub>HPO<sub>4</sub> (14.0 mg, 0.10 mmol) at 150 °C for 1 h afforded recovered C<sub>60</sub> (18.3 mg, 50%) and **2e** (8.5 mg, 19%): amorphous brown solid; <sup>1</sup>H NMR (400 MHz, CS<sub>2</sub> with DMSO-*d*<sub>6</sub> as the external deuterium lock)  $\delta$  8.30 (d,  $J$  = 8.4 Hz, 2H), 7.59 (d,  $J$  = 8.4 Hz, 2H), 1.46 (s, 9H); <sup>13</sup>C NMR (101 MHz, CS<sub>2</sub> with DMSO-*d*<sub>6</sub> as the external deuterium lock and reference, all 2C unless indicated)  $\delta$  164.37 (1C, C=N), 154.85 (1C, aryl C), 147.70, 147.56 (1C), 147.14 (1C), 145.75, 145.74, 145.60, 145.46, 145.40, 145.12, 145.04, 144.86, 144.59, 144.48, 144.26, 143.99, 143.66, 143.21, 142.17, 142.16, 142.06, 141.77 (4C), 141.66, 141.52, 141.40 (4C), 139.82, 139.00, 137.23, 135.49, 128.72 (aryl C), 125.23 (aryl C), 123.67 (1C, aryl C), 96.58 (1C, sp<sup>3</sup>-C of C<sub>60</sub>), 91.72 (1C, sp<sup>3</sup>-C of C<sub>60</sub>), 34.26 (1C), 30.80 (3C); FT-IR  $\nu/\text{cm}^{-1}$  (KBr) 1640, 1324, 1111, 1085, 984, 932, 843, 774, 686, 661, 603, 576, 563, 525; UV-vis (CHCl<sub>3</sub>)  $\lambda_{\text{max}}$  nm (log  $\epsilon$ ) 256 (5.08), 316 (4.62), 419 (3.45), 456 (3.23), 680 (2.27); MALDI-TOF MS  $m/z$  calcd for C<sub>71</sub>H<sub>13</sub>NO [M]<sup>-</sup> 895.1003, found 895.1001.

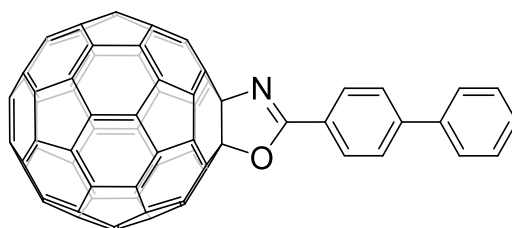

**2f**

**Synthesis and spectral data of 2f:** by following the general procedure, the reaction of C<sub>60</sub> (35.5 mg, 0.05 mmol) with **1f** (53.5 mg, 0.25 mmol), CuBr<sub>2</sub> (11.3 mg, 0.05 mmol) and Na<sub>2</sub>HPO<sub>4</sub> (14.3 mg, 0.10 mmol) at 150 °C for 1 h afforded recovered C<sub>60</sub> (17.3 mg, 49%) and **2f** (10.6 mg, 23%): amorphous brown solid; <sup>1</sup>H NMR (400 MHz, CS<sub>2</sub> with DMSO-*d*<sub>6</sub> as the external deuterium lock)  $\delta$  8.46 (dd,  $J$  = 8.3, 1.6 Hz, 2H), 7.79 (dd,  $J$  = 8.3, 1.6 Hz, 2H), 7.69–7.61 (m, 2H), 7.50–7.41 (m, 2H), 7.41–7.34 (m, 1H); <sup>13</sup>C NMR (101 MHz, CS<sub>2</sub> with DMSO-*d*<sub>6</sub> as the external deuterium lock and reference, all 2C unless indicated)  $\delta$  164.46 (1C, C=N), 147.74 (3C), 147.31 (1C), 145.93 (4C), 145.78,

145.64, 145.58, 145.31, 145.20, 145.02, 144.77 (3C including 1 aryl C), 144.66, 144.41, 144.16, 143.83, 143.26, 142.35 (4C), 142.24, 141.94 (4C), 141.84, 141.69, 141.57 (4C), 140.02, 139.58 (1C, aryl C), 139.19, 137.41, 135.68, 129.52 (aryl C), 128.81 (aryl C), 127.97 (1C, aryl C), 127.13 (aryl C), 127.02 (aryl C), 125.39 (1C, aryl C), 96.89 (1C, sp<sup>3</sup>-C of C<sub>60</sub>), 91.91 (1C, sp<sup>3</sup>-C of C<sub>60</sub>); FT-IR  $\nu/\text{cm}^{-1}$  (KBr) 1638, 1511, 1322, 1088, 982, 931, 847, 766, 730, 694, 661, 603, 575, 563, 525; UV-vis (CHCl<sub>3</sub>)  $\lambda_{\text{max}}$  nm (log  $\epsilon$ ) 258 (5.04), 314 (4.75), 413 (3.52), 454 (3.22), 689 (2.34); MALDI-TOF MS  $m/z$  calcd for C<sub>73</sub>H<sub>9</sub>NO [M]<sup>-</sup> 915.0690, found 915.0684.

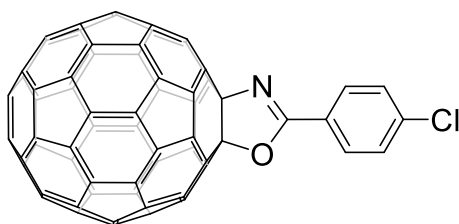

**2g**

**Synthesis and spectral data of 2g:** by following the general procedure, the reaction of C<sub>60</sub> (35.8 mg, 0.05 mmol) with **1g** (27.4 mg, 0.15 mmol), CuBr<sub>2</sub> (11.1 mg, 0.05 mmol) and Na<sub>2</sub>HPO<sub>4</sub> (14.5 mg, 0.10 mmol) at 150 °C for 1 h afforded recovered C<sub>60</sub> (15.6 mg, 44%) and **2g**<sup>2b-d,f</sup> (12.6 mg, 29%): amorphous brown solid; <sup>1</sup>H NMR (500 MHz, 1:1 CS<sub>2</sub>/CDCl<sub>3</sub>)  $\delta$  8.40 (d,  $J$  = 8.5 Hz, 2H), 7.60 (d,  $J$  = 8.5 Hz, 2H).

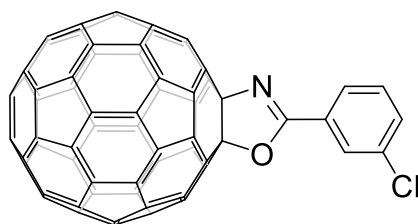

**2h**

**Synthesis and spectral data of 2h:** by following the general procedure, the reaction of C<sub>60</sub> (36.1 mg, 0.05 mmol) with **1h** (27.6 mg, 0.15 mmol), CuBr<sub>2</sub> (11.4 mg, 0.05 mmol) and Na<sub>2</sub>HPO<sub>4</sub> (14.5 mg, 0.10 mmol) at 150 °C for 1 h afforded recovered C<sub>60</sub> (10.1 mg, 28%) and **2h**<sup>2e</sup> (9.4 mg, 21%): amorphous brown solid; <sup>1</sup>H NMR (500 MHz, 1:1 CS<sub>2</sub>/CDCl<sub>3</sub>)  $\delta$  8.46 (t,  $J$  = 2.0 Hz, 1H), 8.36 (dt,  $J$  = 8.0, 1.3 Hz, 1H), 7.69–7.62 (m, 1H), 7.58 (t,  $J$  = 8.0 Hz, 1H).

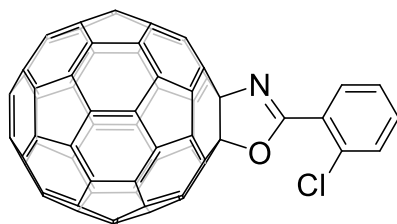

**2i**

**Synthesis and spectral data of 2i:** by following the general procedure, the reaction of

C<sub>60</sub> (36.2 mg, 0.05 mmol) with **1i** (27.2 mg, 0.15 mmol), CuBr<sub>2</sub> (11.1 mg, 0.05 mmol) and Na<sub>2</sub>HPO<sub>4</sub> (14.1 mg, 0.10 mmol) at 160 °C for 1 h afforded recovered C<sub>60</sub> (16.2 mg, 45%) and **2i**<sup>2e,f</sup> (8.0 mg, 18%): amorphous brown solid; <sup>1</sup>H NMR (500 MHz, 1:1 CS<sub>2</sub>/CDCl<sub>3</sub>) δ 8.37 (d, *J* = 7.6 Hz, 1H), 7.67 (d, *J* = 8.0 Hz, 1H), 7.59 (dd, *J* = 8.0, 7.6 Hz, 1H), 7.54 (t, *J* = 7.5 Hz, 1H).

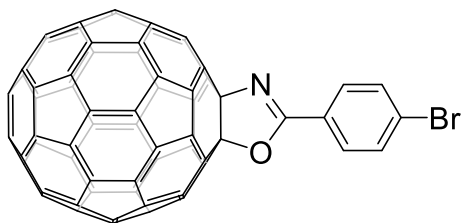

**2j**

**Synthesis and spectral data of 2j:** by following the general procedure, the reaction of C<sub>60</sub> (36.2 mg, 0.05 mmol) with **1j** (34.4 mg, 0.15 mmol), CuBr<sub>2</sub> (11.2 mg, 0.05 mmol) and Na<sub>2</sub>HPO<sub>4</sub> (14.2 mg, 0.10 mmol) at 150 °C for 1 h afforded recovered C<sub>60</sub> (13.6 mg, 38%) and **2j**<sup>2a</sup> (11.7 mg, 25%): amorphous brown solid; <sup>1</sup>H NMR (400 MHz, CS<sub>2</sub> with DMSO-*d*<sub>6</sub> as the external deuterium lock) δ 8.30 (d, *J* = 8.4 Hz, 2H), 7.75 (d, *J* = 8.4 Hz, 2H).

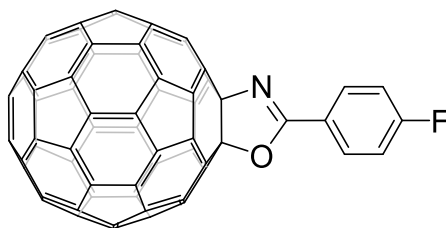

**2k**

**Synthesis and spectral data of 2k:** by following the general procedure, the reaction of C<sub>60</sub> (36.0 mg, 0.05 mmol) with **1k** (25.0 mg, 0.15 mmol), CuBr<sub>2</sub> (11.3 mg, 0.05 mmol) and Na<sub>2</sub>HPO<sub>4</sub> (14.2 mg, 0.10 mmol) at 150 °C for 1 h and afforded recovered C<sub>60</sub> (16.8 mg, 47%) and **2k** (13.1 mg, 31%): amorphous brown solid; <sup>1</sup>H NMR (500 MHz, CS<sub>2</sub> with DMSO-*d*<sub>6</sub> as the external deuterium lock) δ 8.44 (dd, *J* = 8.4, 5.5 Hz, 2H), 7.28 (t, *J* = 8.3 Hz, 2H); <sup>13</sup>C NMR (126 MHz, CS<sub>2</sub> with DMSO-*d*<sub>6</sub> as the external deuterium lock, all 2C unless indicated) δ 164.29 (1C, aryl C, d, *J* = 255.5 Hz), 163.06 (1C, C=N), 147.10 (1C), 146.90, 146.68 (1C), 145.29 (4C), 145.15, 145.00, 144.95, 144.67, 144.48, 144.33, 144.13, 144.02, 143.68, 143.50, 143.17, 142.41, 141.72, 141.69, 141.61, 141.28, 141.25, 141.18, 141.04, 140.92, 140.87, 139.37, 138.55, 136.75, 135.00, 130.61 (aryl C, d, *J* = 8.8 Hz), 122.24 (1C, aryl C, d, *J* = 3.2 Hz), 114.93 (aryl C, d, *J* = 21.8 Hz), 96.41 (1C, sp<sup>3</sup>-C of C<sub>60</sub>), 91.16 (1C, sp<sup>3</sup>-C of C<sub>60</sub>); FT-IR ν/cm<sup>-1</sup> (KBr) 1638, 1604, 1510, 1459, 1426, 1341, 1270, 1178, 748, 563, 527; UV-vis (CHCl<sub>3</sub>) λ<sub>max</sub> nm (log ε) 256 (5.01), 317 (4.56), 416 (3.52), 458 (3.27), 684 (2.65); MALDI-TOF MS *m/z* calcd for C<sub>67</sub>H<sub>4</sub>NOF [M]<sup>-</sup> 857.0282, found 857.0286.

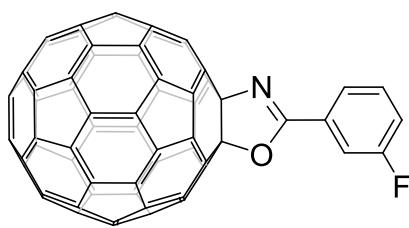

**2l**

**Synthesis and spectral data of 2l:** by following the general procedure, the reaction of C<sub>60</sub> (35.7 mg, 0.05 mmol) with **1l** (22.2 mg, 0.15 mmol), CuBr<sub>2</sub> (11.5 mg, 0.05 mmol) and Na<sub>2</sub>HPO<sub>4</sub> (14.6 mg, 0.10 mmol) at 150 °C for 1 h afforded recovered C<sub>60</sub> (13.0 mg, 36%) and **2l** (11.5 mg, 27%): amorphous brown solid; <sup>1</sup>H NMR (500 MHz, CS<sub>2</sub> with DMSO-*d*<sub>6</sub> as the external deuterium lock) δ 8.25–8.20 (m, 1H), 8.13–8.06 (m, 1H), 7.61 (td, *J* = 7.9, 5.6 Hz, 1H), 7.38–7.32 (m, 1H); <sup>13</sup>C NMR (126 MHz, CS<sub>2</sub> with DMSO-*d*<sub>6</sub> as the external deuterium lock and reference, all 2C unless indicated) δ 163.05 (1C, C=N, d, *J* = 3.0 Hz), 161.56 (1C, aryl C, d, *J* = 248.8 Hz), 147.11 (1C), 146.69 (3C), 145.32, 145.31, 145.17, 145.02, 144.96, 144.70, 144.49, 144.33, 144.15, 144.03, 143.68, 143.49, 143.17, 142.24, 141.74, 141.69, 141.62, 141.30, 141.23, 141.20, 141.06, 140.93, 140.87, 139.39, 138.58, 136.74, 135.05, 129.39 (1C, aryl C, *J* = 7.7 Hz), 128.20 (1C, aryl C, d, *J* = 8.2 Hz), 123.91 (1C, aryl C, d, *J* = 3.1 Hz), 118.34 (1C, aryl C, d, *J* = 21.1 Hz), 115.24 (1C, aryl C, d, *J* = 23.5 Hz), 96.46 (1C, sp<sup>3</sup>-C of C<sub>60</sub>), 91.10 (1C, sp<sup>3</sup>-C of C<sub>60</sub>); FT-IR ν/cm<sup>-1</sup> (KBr) 1644, 1452, 1316, 1086, 982, 936, 883, 848, 789, 713, 564, 526; UV-vis (CHCl<sub>3</sub>) λ<sub>max</sub> nm (log ε) 256 (5.11), 316 (4.67), 412 (3.62), 454 (3.36), 683 (2.61); MALDI-TOF MS *m/z* calcd for C<sub>67</sub>H<sub>4</sub>NOF [M]<sup>+</sup> 857.0282, found 857.0285.

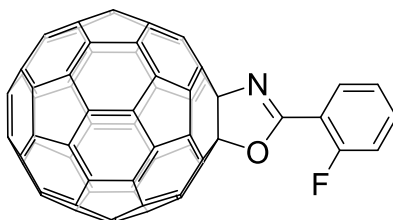

**2m**

**Synthesis and spectral data of 2m:** by following the general procedure, the reaction of C<sub>60</sub> (36.2 mg, 0.05 mmol) with **1m** (37.0 mg, 0.25 mmol), CuBr<sub>2</sub> (11.1 mg, 0.05 mmol) and Na<sub>2</sub>HPO<sub>4</sub> (14.5 mg, 0.10 mmol) at 150 °C for 1 h afforded recovered C<sub>60</sub> (11.4 mg, 31%) and **2m** (10.4 mg, 24%): amorphous brown solid; <sup>1</sup>H NMR (500 MHz, 1:1 CS<sub>2</sub>/CDCl<sub>3</sub>) δ 8.45 (td, *J* = 7.4, 1.6 Hz, 1H), 7.72–7.62 (m, 1H), 7.42 (t, *J* = 7.6 Hz, 1H), 7.35 (dd, *J* = 10.1, 8.9 Hz, 1H); <sup>13</sup>C NMR (126 MHz, 1:1 CS<sub>2</sub>/CDCl<sub>3</sub>, all 2C unless indicated) δ 162.81 (1C, C=N, d, *J* = 5.4 Hz), 161.62 (1C, aryl C, d, *J* = 261.6 Hz), 148.15 (1C), 147.74 (1C), 147.53, 146.34 (4C), 146.22, 146.04, 145.99, 145.76, 145.60, 145.40, 145.16, 145.06, 144.78, 144.50, 144.19, 143.22, 142.73, 142.68, 142.62, 142.31, 142.20 (4C), 142.06, 141.94, 141.88, 140.34, 139.58, 137.79, 136.25, 134.18 (1C, aryl C, d, *J* = 8.7 Hz), 131.95 (1C, aryl C), 124.32 (1C, aryl C, d, *J* = 3.8 Hz), 117.14 (1C, aryl C, d, *J* = 21.6 Hz), 115.16 (1C, aryl C, d, *J* = 10.2 Hz), 97.01 (1C, sp<sup>3</sup>-

C of C<sub>60</sub>), 91.98 (1C, sp<sup>3</sup>-C of C<sub>60</sub>); FT-IR  $\nu/\text{cm}^{-1}$  (KBr) 1641, 1495, 1456, 1330, 1229, 1066, 982, 932, 822, 763, 740, 658, 603, 563, 526; UV-vis (CHCl<sub>3</sub>)  $\lambda_{\text{max}}$  nm (log  $\epsilon$ ) 256 (5.02), 317 (4.57), 417 (3.53), 454 (3.30), 684 (2.52); MALDI-TOF MS  $m/z$  calcd for C<sub>67</sub>H<sub>4</sub>NOF [M]<sup>-</sup> 857.0282, found 857.0289.

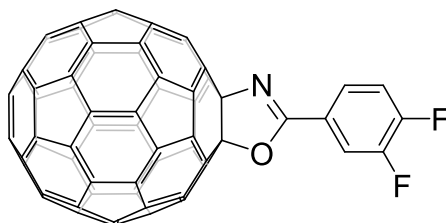

**2n**

**Synthesis and spectral data of 2n:** by following the general procedure, the reaction of C<sub>60</sub> (35.8 mg, 0.05 mmol) with **1n** (27.8 mg, 0.15 mmol), CuBr<sub>2</sub> (11.2 mg, 0.05 mmol) and Na<sub>2</sub>HPO<sub>4</sub> (14.2 mg, 0.10 mmol) at 150 °C for 1 h afforded recovered C<sub>60</sub> (13.2 mg, 37%) and **2n** (11.1 mg, 26%): amorphous brown solid; <sup>1</sup>H NMR (500 MHz, 1:1 CS<sub>2</sub>/CDCl<sub>3</sub>)  $\delta$  8.34–8.28 (m, 1H), 8.28–8.24 (m, 1H), 7.47–7.40 (m, 1H); <sup>13</sup>C NMR (126 MHz, 1:1 CS<sub>2</sub>/CDCl<sub>3</sub>, all 2C unless indicated)  $\delta$  163.93 (1C, C=N), 153.23 (1C, aryl C, dd,  $J$  = 256.9, 12.7 Hz), 150.34 (1C, aryl C, dd,  $J$  = 250.9, 13.1 Hz), 148.18 (1C), 147.77 (1C), 147.36, 146.37 (4C), 146.23, 146.07, 146.02, 145.77, 145.39, 145.35, 145.19, 145.09, 144.61, 144.49, 144.19, 143.01, 142.77, 142.71, 142.66, 142.30, 142.21, 142.19, 142.08, 141.95, 141.83, 140.41, 139.61, 137.81, 136.19, 126.01 (1C, aryl C, dd,  $J$  = 7.1, 3.7 Hz), 123.88 (1C, aryl C, dd,  $J$  = 6.4, 3.8 Hz), 118.60 (1C, aryl C, d,  $J$  = 19.6 Hz), 117.85 (1C, aryl C, d,  $J$  = 17.9 Hz), 97.84 (1C, sp<sup>3</sup>-C of C<sub>60</sub>), 91.95 (1C, sp<sup>3</sup>-C of C<sub>60</sub>); FT-IR  $\nu/\text{cm}^{-1}$  (KBr) 1646, 1512, 1438, 1339, 1323, 1268, 1195, 1141, 1080, 983, 937, 823, 794, 776, 720, 563, 526; UV-vis (CHCl<sub>3</sub>)  $\lambda_{\text{max}}$  nm (log  $\epsilon$ ) 256 (5.07), 317 (4.61), 416 (3.45), 452 (3.20), 683 (2.42); MALDI-TOF MS  $m/z$  calcd for C<sub>67</sub>H<sub>3</sub>NOF<sub>2</sub> [M]<sup>-</sup> 875.0188, found 875.0182.

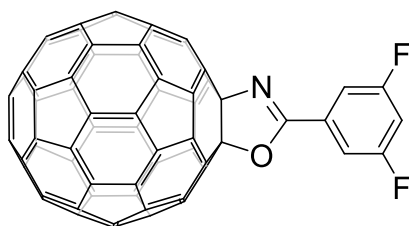

**2o**

**Synthesis and spectral data of 2o:** by following the general procedure, the reaction of C<sub>60</sub> (35.8 mg, 0.05 mmol) with **1o** (27.3 mg, 0.15 mmol), CuBr<sub>2</sub> (11.9 mg, 0.05 mmol) and Na<sub>2</sub>HPO<sub>4</sub> (14.1 mg, 0.10 mmol) at 150 °C for 1 h afforded recovered C<sub>60</sub> (14.2 mg, 40%) and **2o** (8.8 mg, 20%): amorphous brown solid; <sup>1</sup>H NMR (500 MHz, 1:1 CS<sub>2</sub>/CDCl<sub>3</sub>)  $\delta$  8.03–7.96 (m, 2H), 7.12 (tt,  $J$  = 8.5, 2.4 Hz, 1H); <sup>13</sup>C NMR (126 MHz, 1:1 CS<sub>2</sub>/CDCl<sub>3</sub>, all 2C unless indicated)  $\delta$  163.89 (1C, C=N, t,  $J$  = 3.6 Hz), 162.99 (aryl C, dd,  $J$  = 250.7, 12.1 Hz), 148.19 (1C), 147.77 (1C), 147.13, 146.39, 146.37, 146.24, 146.08, 146.02, 145.79, 145.38, 145.33, 145.19, 145.09, 144.60, 144.48, 144.18,



142.81, 142.77, 142.70, 142.66, 142.30, 142.21, 142.16, 142.08, 141.95, 141.81, 140.42, 139.63, 137.80, 136.23, 129.92 (1C, aryl C, t,  $J = 10.2$  Hz), 112.31 (aryl C, dd,  $J = 20.9, 6.9$  Hz), 107.88 (1C, aryl C, t,  $J = 25.1$  Hz), 97.88 (1C,  $sp^3$ -C of  $C_{60}$ ), 91.89 (1C,  $sp^3$ -C of  $C_{60}$ ); FT-IR  $\nu/cm^{-1}$  (KBr) 1648, 1619, 1593, 1437, 1354, 1123, 987, 938, 873, 853, 717, 561, 526; UV-vis ( $CHCl_3$ )  $\lambda_{max}$  nm ( $\log \epsilon$ ) 254 (5.06), 318 (4.59), 415 (3.48), 457 (3.22), 682 (2.50); MALDI-TOF MS  $m/z$  calcd for  $C_{67}H_3NOF_2$  [M]<sup>+</sup> 875.0188, found 875.0185.

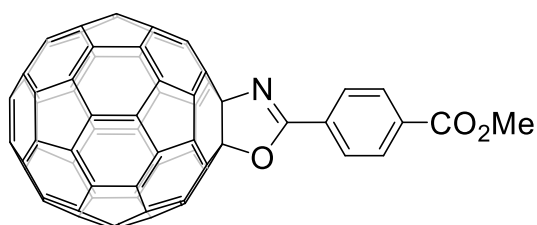

**2p**

**Synthesis and spectral data of 2p:** by following the general procedure, the reaction of  $C_{60}$  (35.7 mg, 0.05 mmol) with **1p** (30.7 mg, 0.15 mmol),  $CuBr_2$  (11.2 mg, 0.05 mmol) and  $Na_2HPO_4$  (14.3 mg, 0.10 mmol) at 150 °C for 1 h afforded recovered  $C_{60}$  (10.8 mg, 30%) and **2p**<sup>2b,e</sup> (10.1 mg, 23%): amorphous brown solid;  $^1H$  NMR (500 MHz, 1:1  $CS_2/CDCl_3$ )  $\delta$  8.54 (d,  $J = 7.8$  Hz, 2H), 8.29 (d,  $J = 7.8$  Hz, 2H), 4.00 (s, 3H).

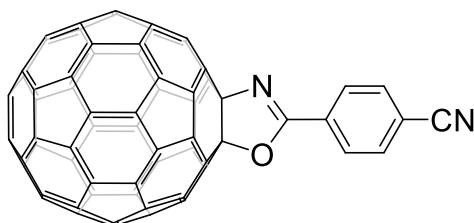

**2q**

**Synthesis and spectral data of 2q:** by following the general procedure, the reaction of  $C_{60}$  (35.6 mg, 0.05 mmol) with **1q** (25.4 mg, 0.15 mmol),  $CuBr_2$  (12.4 mg, 0.05 mmol) and  $Na_2HPO_4$  (14.4 mg, 0.10 mmol) at 150 °C for 1 h afforded recovered  $C_{60}$  (9.7 mg, 27%) and **2q**<sup>2b</sup> (10.4 mg, 24%): amorphous brown solid;  $^1H$  NMR (500 MHz, 1:1  $CS_2/CDCl_3$ )  $\delta$  8.59 (d,  $J = 8.3$  Hz, 2H), 7.93 (d,  $J = 8.3$  Hz, 2H).

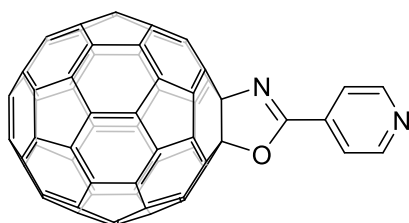

**2r**

**Synthesis and spectral data of 2r:** by following the general procedure, the reaction of  $C_{60}$  (36.1 mg, 0.05 mmol) with **1r** (22.4 mg, 0.15 mmol),  $CuBr_2$  (11.5 mg, 0.05 mmol) and  $Na_2HPO_4$  (14.4 mg, 0.10 mmol) at 150 °C for 1 h afforded recovered  $C_{60}$  (24.9 mg,

69%) and **2r** (4.7 mg, 14%): amorphous brown solid;  $^1\text{H}$  NMR (500 MHz, 1:1  $\text{CS}_2/\text{CDCl}_3$ )  $\delta$  8.95 (d,  $J = 6.0$  Hz, 2H), 8.28 (d,  $J = 6.0$  Hz, 2H);  $^{13}\text{C}$  NMR (151 MHz, 1:1  $\text{CS}_2/\text{CDCl}_3$ , all 2C unless indicated)  $\delta$  164.14 (1C,  $\text{C}=\text{N}$ ), 150.63 (aryl C), 148.15 (1C), 147.74 (1C), 146.97, 146.37 (4C), 146.22, 146.05, 146.00, 145.77, 145.36, 145.29, 145.17, 145.08, 144.57, 144.44, 144.15, 142.76, 142.69 (4C), 142.65, 142.28, 142.19, 142.13, 142.06, 141.93, 141.79, 140.42, 139.63, 137.72, 136.19, 134.13 (1C, aryl C), 122.44 (aryl C), 97.76 (1C,  $\text{sp}^3\text{-C}$  of  $\text{C}_{60}$ ), 91.91 (1C,  $\text{sp}^3\text{-C}$  of  $\text{C}_{60}$ ); FT-IR  $\nu/\text{cm}^{-1}$  (KBr) 1648, 1592, 1556, 1408, 1333, 1099, 991, 981, 930, 831, 773, 563, 526; UV-vis ( $\text{CHCl}_3$ )  $\lambda_{\text{max}}$  nm (log  $\epsilon$ ) 255 (5.04), 317 (4.58), 416 (3.49), 449 (3.26), 684 (2.39); MALDI-TOF MS  $m/z$  calcd for  $\text{C}_{66}\text{H}_4\text{N}_2\text{O}$  [ $\text{M}$ ] $^-$  840.0329, found 840.0315.

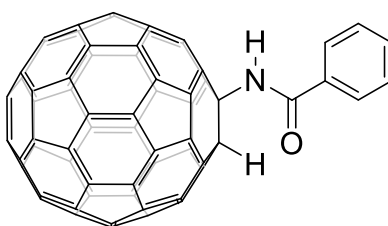

**3a**

**Synthesis and spectral data of 3a:** 16.8 mg (0.02 mmol) of **2a** was electroreduced by controlled potential electrolysis (CPE) at  $-1.07$  V vs saturated calomel electrode (SCE) in 15 mL of 1,2- $\text{C}_6\text{H}_4\text{Cl}_2$  containing 0.1 M *n*-butylammonium perchlorate (TBAP) under an argon atmosphere at  $0$  °C. CPE was carried out on a potentiostat/galvanostat using an “H” type cell which consisted of two platinum gauze electrodes (serving as working and counter electrodes, respectively) separated by a sintered glass frit. The SCE was used as reference electrode and separated from the bulk of the solution by a fritted-glass bridge of low porosity, which contained the solvent/supporting electrolyte mixture. The electrolysis was terminated when the theoretical number of coulombs required for a full conversion of **2a** to  $\mathbf{2a}^{2-}$  was reached. Then, the dianionic  $\mathbf{2a}^{2-}$  was reacted with trifluoroacetic acid (7.6  $\mu\text{L}$ , 0.10 mmol) at  $0$  °C for 10 min. The reaction mixture was filtered through a silica gel (200–300 mesh) plug with  $\text{CS}_2/\text{CH}_2\text{Cl}_2$  (1:1, v/v) to remove the supporting electrolyte and insoluble materials. After evaporation in vacuo, the residue was separated on a silica gel (300–400 mesh) column with  $\text{CS}_2/\text{CH}_2\text{Cl}_2$  (4:1, v/v) to afford product **3a** (8.5 mg, 50%) as an amorphous brown solid;  $^1\text{H}$  NMR (400 MHz,  $\text{CDCl}_2\text{CDCl}_2$ )  $\delta$  8.52 (s, 1H), 8.23–8.14 (m, 2H), 7.68–7.63 (m, 1H), 7.63–7.56 (m, 2H), 6.91 (s, 1H);  $^{13}\text{C}$  NMR (151 MHz, 2:1  $\text{CDCl}_2\text{CDCl}_2/\text{CS}_2$ , all 2C unless indicated)  $\delta$  166.99 (1C,  $\text{C}=\text{O}$ ), 151.84, 147.98, 146.90 (1C), 146.15 (1C), 145.59, 145.48, 145.23, 145.09, 145.06, 145.03, 144.64, 144.37, 144.24, 144.20 (4C), 143.88, 143.33, 142.05, 141.62, 141.51, 141.35, 141.17, 141.00, 140.81, 140.50, 140.17, 139.25, 138.74, 137.64, 135.45, 132.40 (1C, aryl C), 131.67 (1C, aryl C), 128.09 (aryl C), 126.47 (aryl C), 71.75 (1C,  $\text{sp}^3\text{-C}$  of  $\text{C}_{60}$ ), 59.53 (1C,  $\text{sp}^3\text{-C}$  of  $\text{C}_{60}$ ); FT-IR  $\nu/\text{cm}^{-1}$  (KBr) 3416, 1668, 1639, 1577, 1515, 1464, 1427, 1269, 1250, 707, 688, 551, 527; UV-vis ( $\text{CHCl}_3$ )  $\lambda_{\text{max}}$  nm (log  $\epsilon$ ) 258 (5.03), 328 (4.52), 405 (3.77), 431 (3.62), 697 (2.87); MALDI-TOF MS  $m/z$  calcd for  $\text{C}_{67}\text{H}_7\text{NO}$  [ $\text{M}$ ] $^-$  841.0533, found 841.0541.

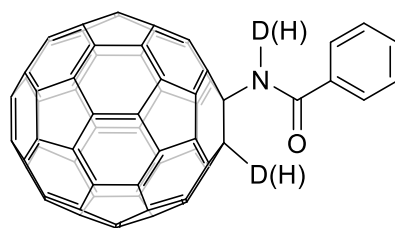

**3a-D**

**Synthesis and spectral data of 3a-D:** 8.4 mg (0.01 mmol) of **2a** was electroreduced by controlled potential electrolysis (CPE) at  $-1.07$  V vs saturated calomel electrode (SCE) in 15 mL of 1,2- $\text{C}_6\text{H}_4\text{Cl}_2$  containing 0.1 M *n*-butylammonium perchlorate (TBAP) under an argon atmosphere at  $0$  °C. The electrolysis was terminated when the theoretical number of coulombs required for a full conversion of **2a** to  $\text{2a}^{2-}$  was reached. Then, the dianionic  $\text{2a}^{2-}$  was reacted with  $\text{CF}_3\text{CO}_2\text{D}$  (73.2  $\mu\text{L}$ , 1.00 mmol) at  $0$  °C for 10 min. After removal of volatiles in vacuo, the residue was dissolved in  $\text{CS}_2$ . Subsequent filtration to remove TBAP and insoluble impurities. Evaporation of the resulting filtrate to remove  $\text{CS}_2$  and then washing with methanol provided product **3a-D** along with decomposition product  $\text{C}_{60}$  as an amorphous brown solid (Figure S1);  $^1\text{H}$  NMR (500 MHz,  $\text{CDCl}_2\text{CDCl}_2$ )  $\delta$  8.54 (s, 0.85H), 8.20 (d,  $J = 7.6$  Hz, 2H), 7.69–7.64 (m, 1H), 7.64–7.57 (m, 2H), 6.91 (s, 0.44H). The  $^1\text{H}$  NMR spectrum of **3a-D** showed all expected signals of **3a** except that the fullereryl proton at 6.91 ppm had an integral of 0.44 and the amide proton at 8.54 ppm had an integral of 0.85, hinting partial H-D exchange during the workup process.

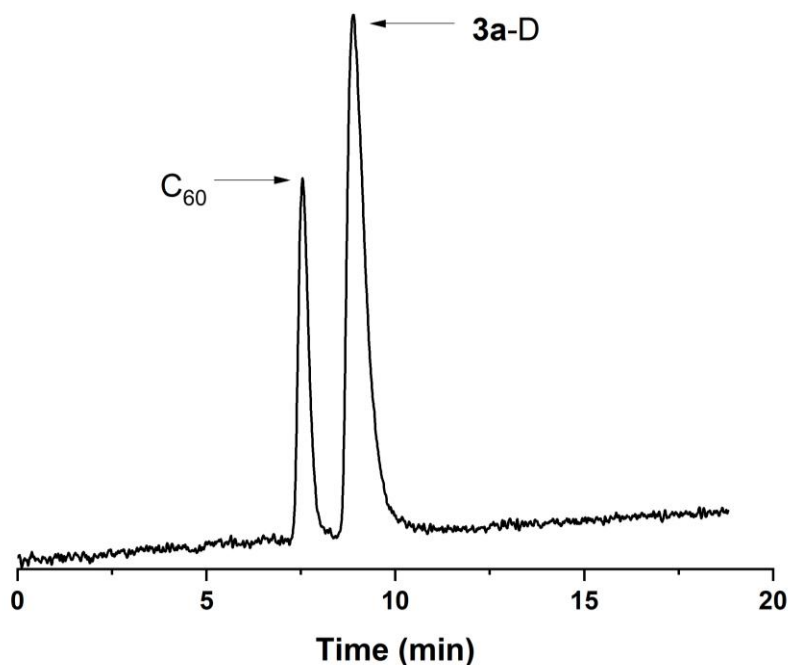

**Figure S1.** Reaction of  $\text{2a}^{2-}$  and  $\text{CF}_3\text{COOD}$ .

#### 4. Attempted reaction of $2a^{2-}$ with MeI or D<sub>2</sub>O

**Attempted reaction of  $2a^{2-}$  with MeI:** 8.4 mg (0.01 mmol) of **2a** was electroreduced by controlled potential electrolysis (CPE) at  $-1.07$  V vs saturated calomel electrode (SCE) in 15 mL of 1,2- $C_6H_4Cl_2$  containing 0.1 M *n*-butylammonium perchlorate (TBAP) under an argon atmosphere at 0 °C. The electrolysis was terminated when the theoretical number of coulombs required for a full conversion of **2a** to  $2a^{2-}$  was reached. Then, the dianionic  $2a^{2-}$  was reacted with MeI (32.0  $\mu$ L, 0.50 mmol) at 0 °C for 6 h. It was found that **2a** was partially decomposed to  $C_{60}$  (Figure S2).

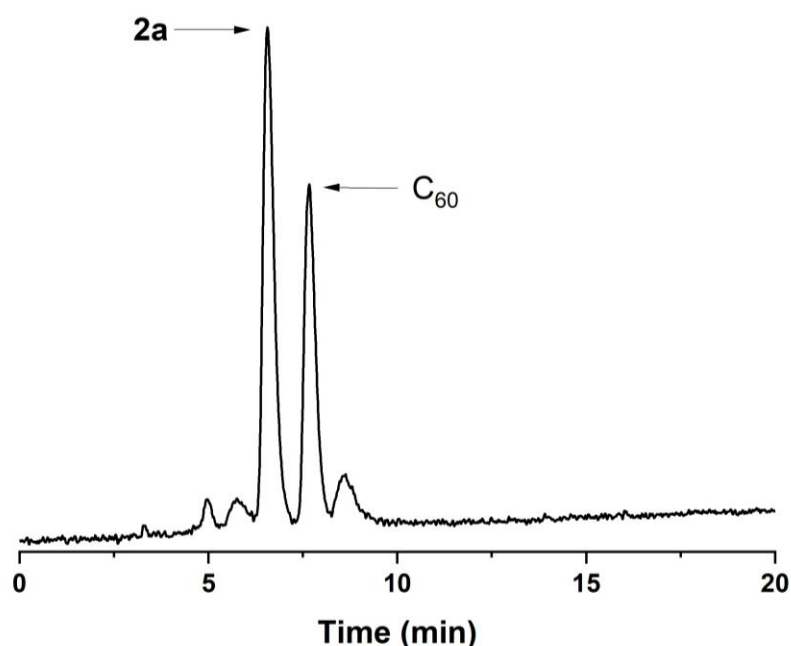

**Figure S2.** Reaction of  $2a^{2-}$  and MeI.

**Attempted reaction of  $2a^{2-}$  with D<sub>2</sub>O:** 8.4 mg (0.01 mmol) of **2a** was electroreduced by controlled potential electrolysis (CPE) at  $-1.07$  V vs saturated calomel electrode (SCE) in 15 mL of 1,2- $C_6H_4Cl_2$  containing 0.1 M *n*-butylammonium perchlorate (TBAP) under an argon atmosphere at 0 °C. The electrolysis was terminated when the theoretical number of coulombs required for a full conversion of **2a** to  $2a^{2-}$  was reached. Then, the dianionic  $2a^{2-}$  was reacted with D<sub>2</sub>O (10.0  $\mu$ L, 0.50 mmol) at 0 °C for 6 h. It was found that **2a** was partially decomposed to  $C_{60}$  (Figure S3).

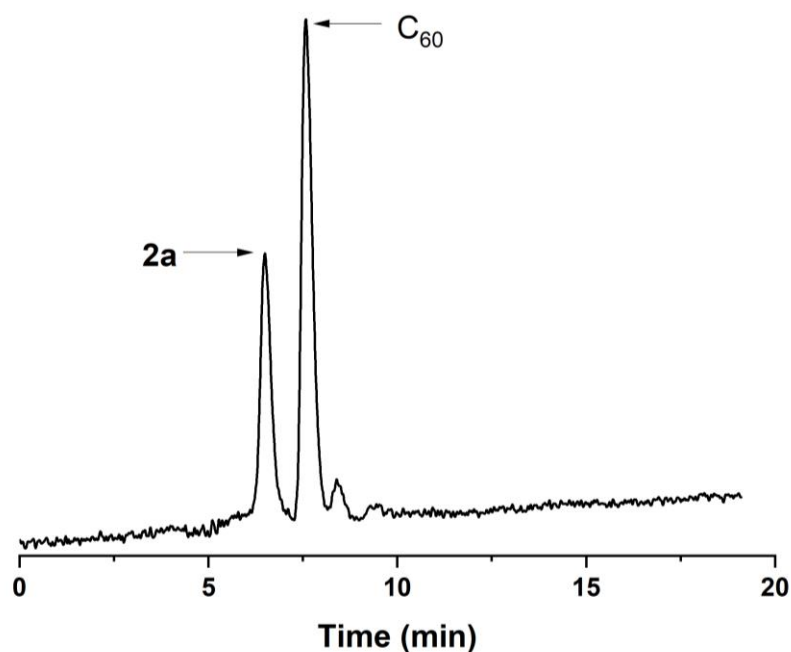

**Figure S3.** Reaction of  $2a^{2-}$  and  $D_2O$ .

### 5. Control experiments

A mixture of  $C_{60}$  (36.1 mg, 0.05 mmol), **1a** (21.8 mg, 0.15 mmol) and  $CuBr_2$  (11.4 mg, 0.05 mmol),  $Na_2HPO_4$  (14.4 mg, 0.10 mmol) and TEMPO (3.9 mg, 0.025 mmol) was completely dissolved in 1,2- $C_6H_4Cl_2$ . After being stirred in an oil bath at 150 °C for 1 h, the resulting solution was evaporated in vacuo and subsequently separated on a silica gel column (300–400 mesh) with  $CS_2$  as the eluent to give recovered  $C_{60}$  (24.5 mg, 68%) and the product **2a** (4.4 mg, 10%). While adding 1 equiv. of TEMPO (7.8 mg, 0.05 mmol), there was no desired product, and the radical coupling product **4** between TEMPO and **1a** radical was successfully detected by ESI-MS. ESI-MS  $m/z$  calcd for  $C_{17}H_{24}N_3O [M+H]^+$  286.1914, found 286.1919.

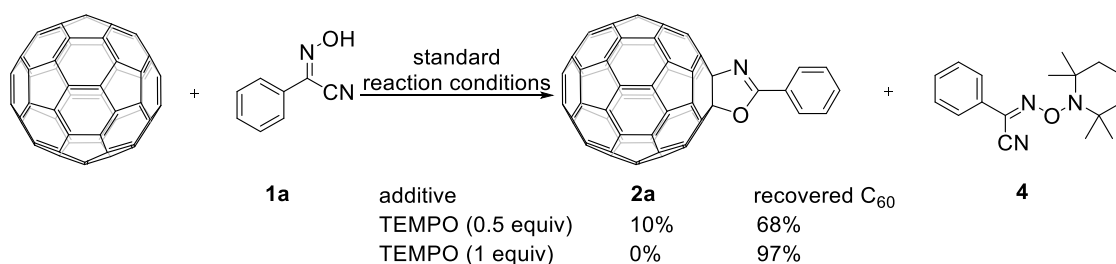

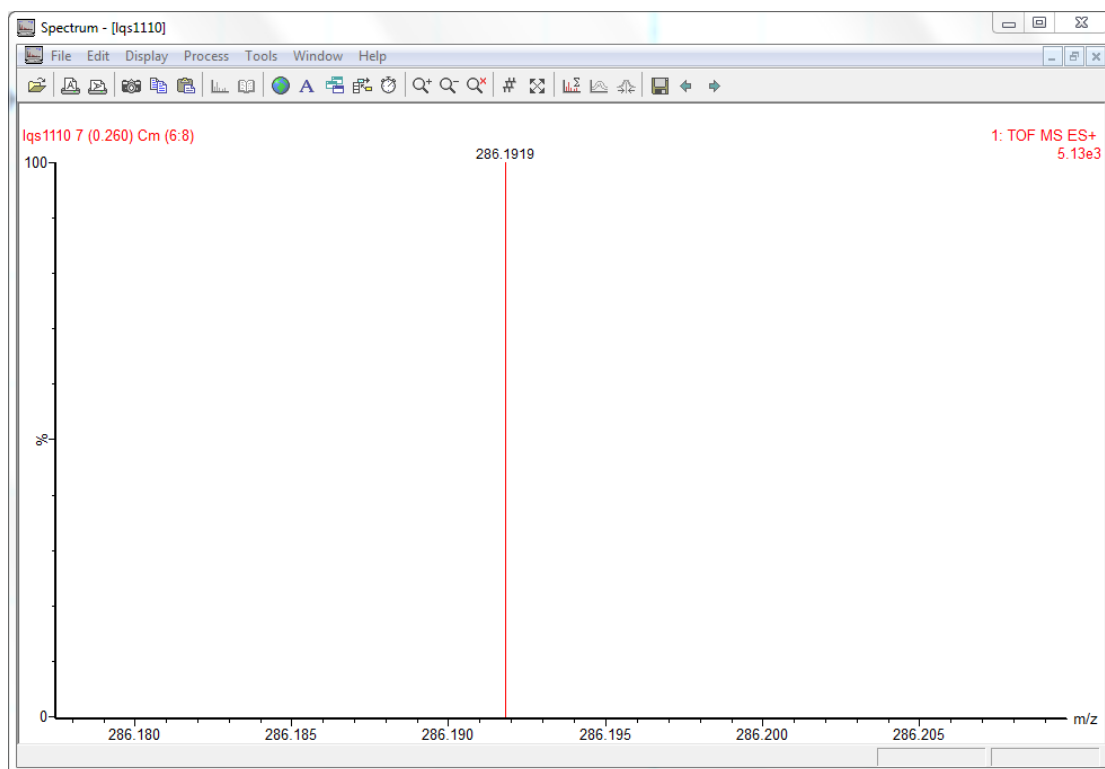

**Figure S4.** HRMS of product 4.

## 6. Reaction mechanism leading to fulleroisoxazoles

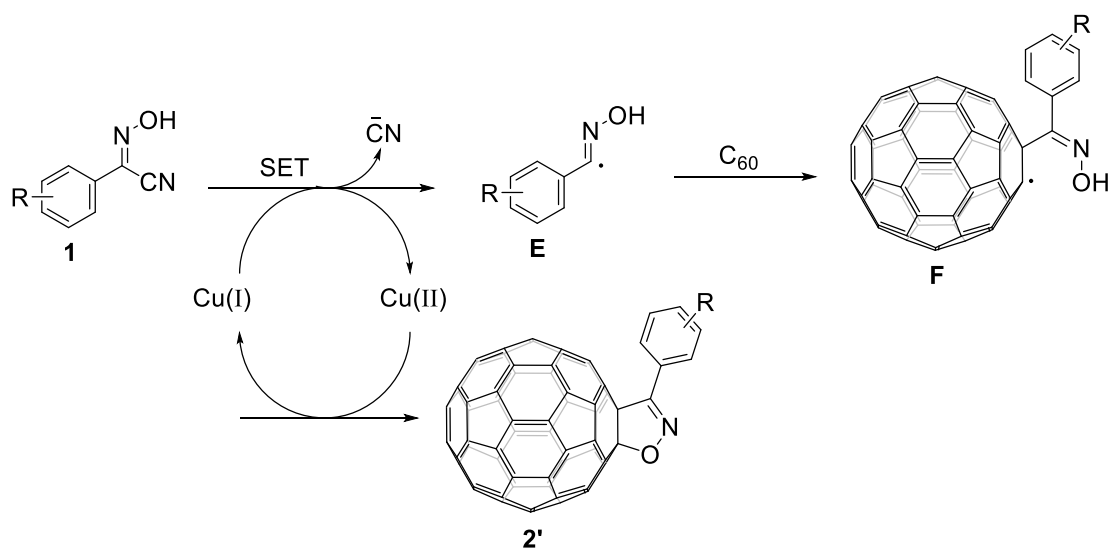

**Scheme S1.** Reaction mechanism for the formation of fulleroisoxazoles **2'**.

## 7. References

- 1 A. J. Neel and R. Zhao, *Org. Lett.*, 2018, **20**, 2024–2027.
- 2 (a) F.-B. Li, T.-X. Liu and G.-W. Wang, *J. Org. Chem.*, 2008, **73**, 6417–6420; (b) Y. Takeda, S. Enokijima, T. Nagamachi, K. Nakayama and S. Minakata, *Asian J. Org. Chem.*, 2013, **2**, 91–97; (c) H.-T. Yang, W.-L. Ren, C.-P. Dong, Y. Yang, X.-Q. Sun and C.-B. Miao, *Tetrahedron Lett.*, 2013, **54**, 6799–6803; (d) H.-T. Yang, X.-C. Liang, Y.-H. Wang, Y. Yang, X.-Q. Sun and C.-B. Miao, *Org. Lett.*, 2013, **15**, 4650–4653; (e) T.-X. Liu, Y. Liu, D. Chao, P. Zhang, Q. Liu, L. Shi, Z. Zhang and G. Zhang, *J. Org. Chem.*, 2014, **79**, 11084–11090; (f) X.-F. Zhang, F.-B. Li, J.-L. Shi, J. Wu and L. Liu, *New J. Chem.*, 2016, **40**, 1626–1632.

## 8. NMR spectra of compounds 2a–r and 3a

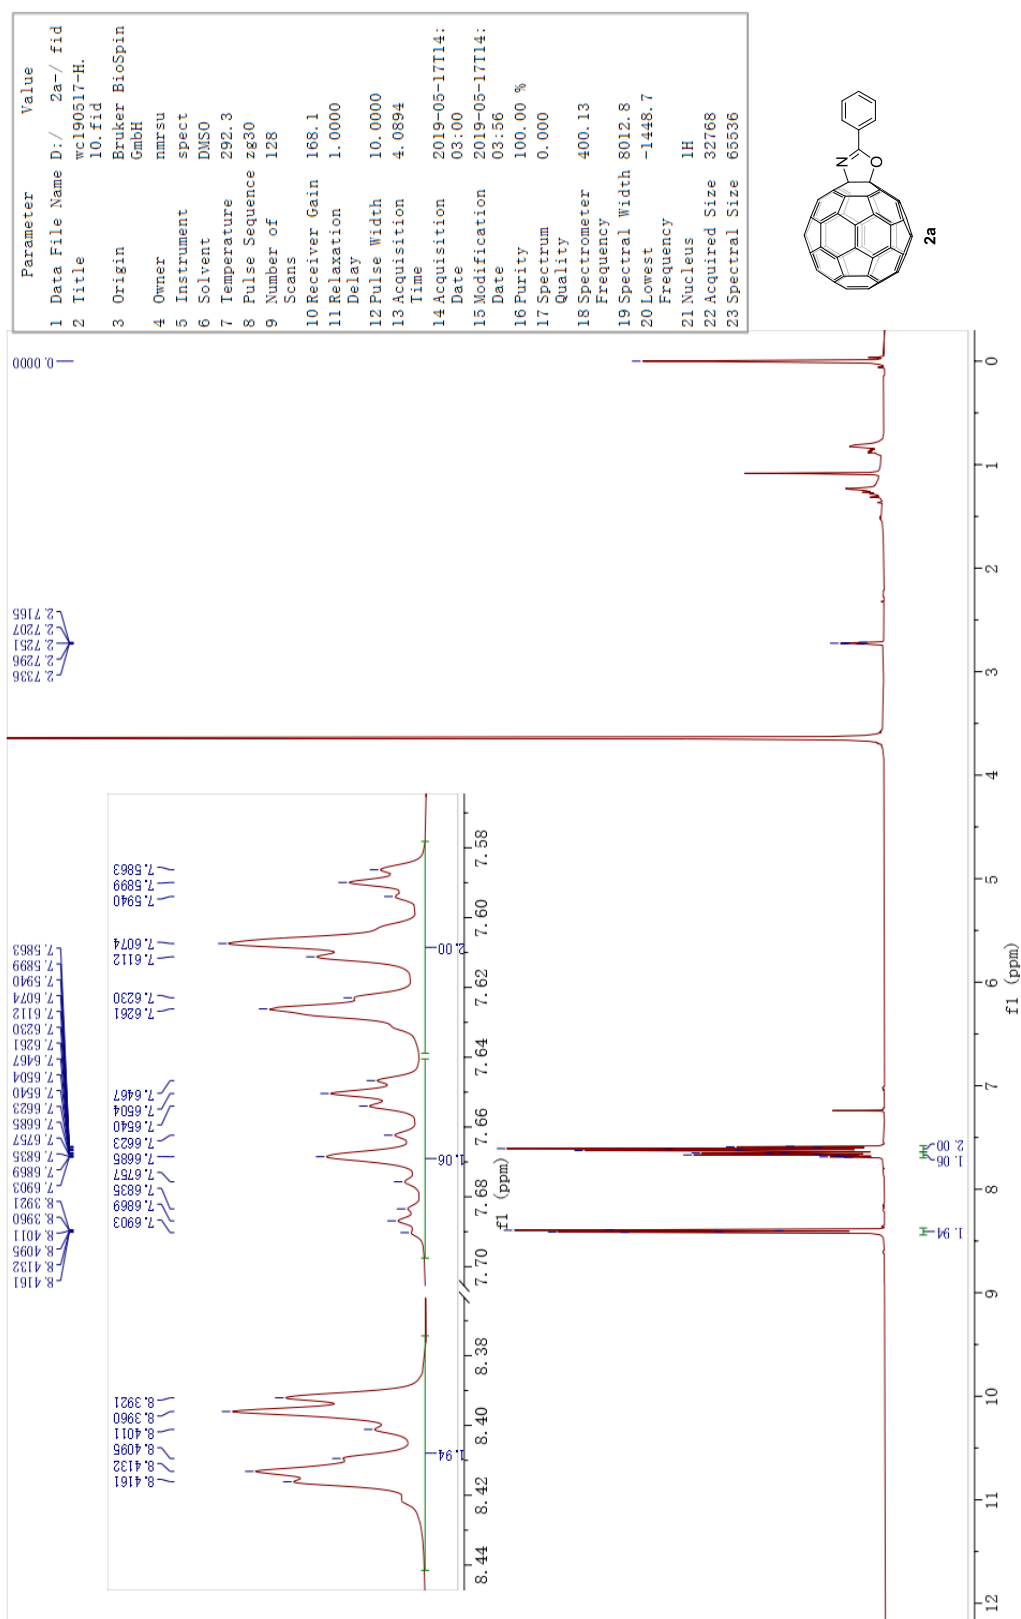

Figure S5. <sup>1</sup>H NMR (400 MHz, CS<sub>2</sub>/DMSO-*d*<sub>6</sub>) of 2a.



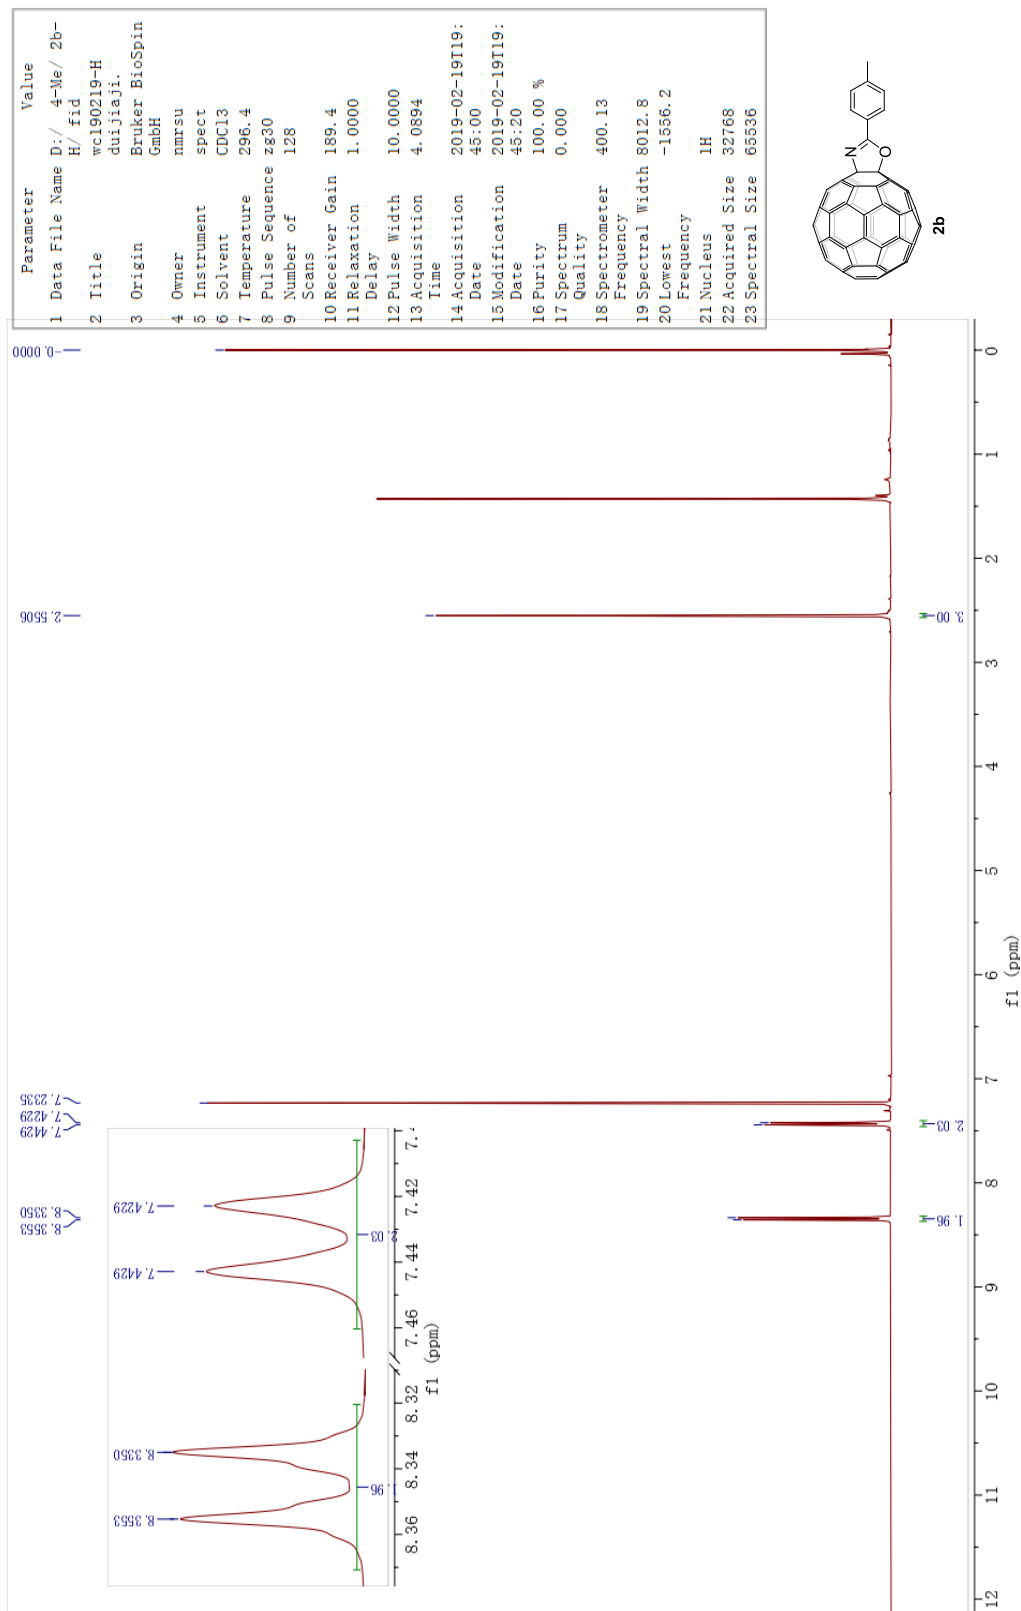

**Figure S6.**  $^1\text{H}$  NMR (400 MHz, 1:1  $\text{CS}_2/\text{CDCl}_3$ ) of **2b**.

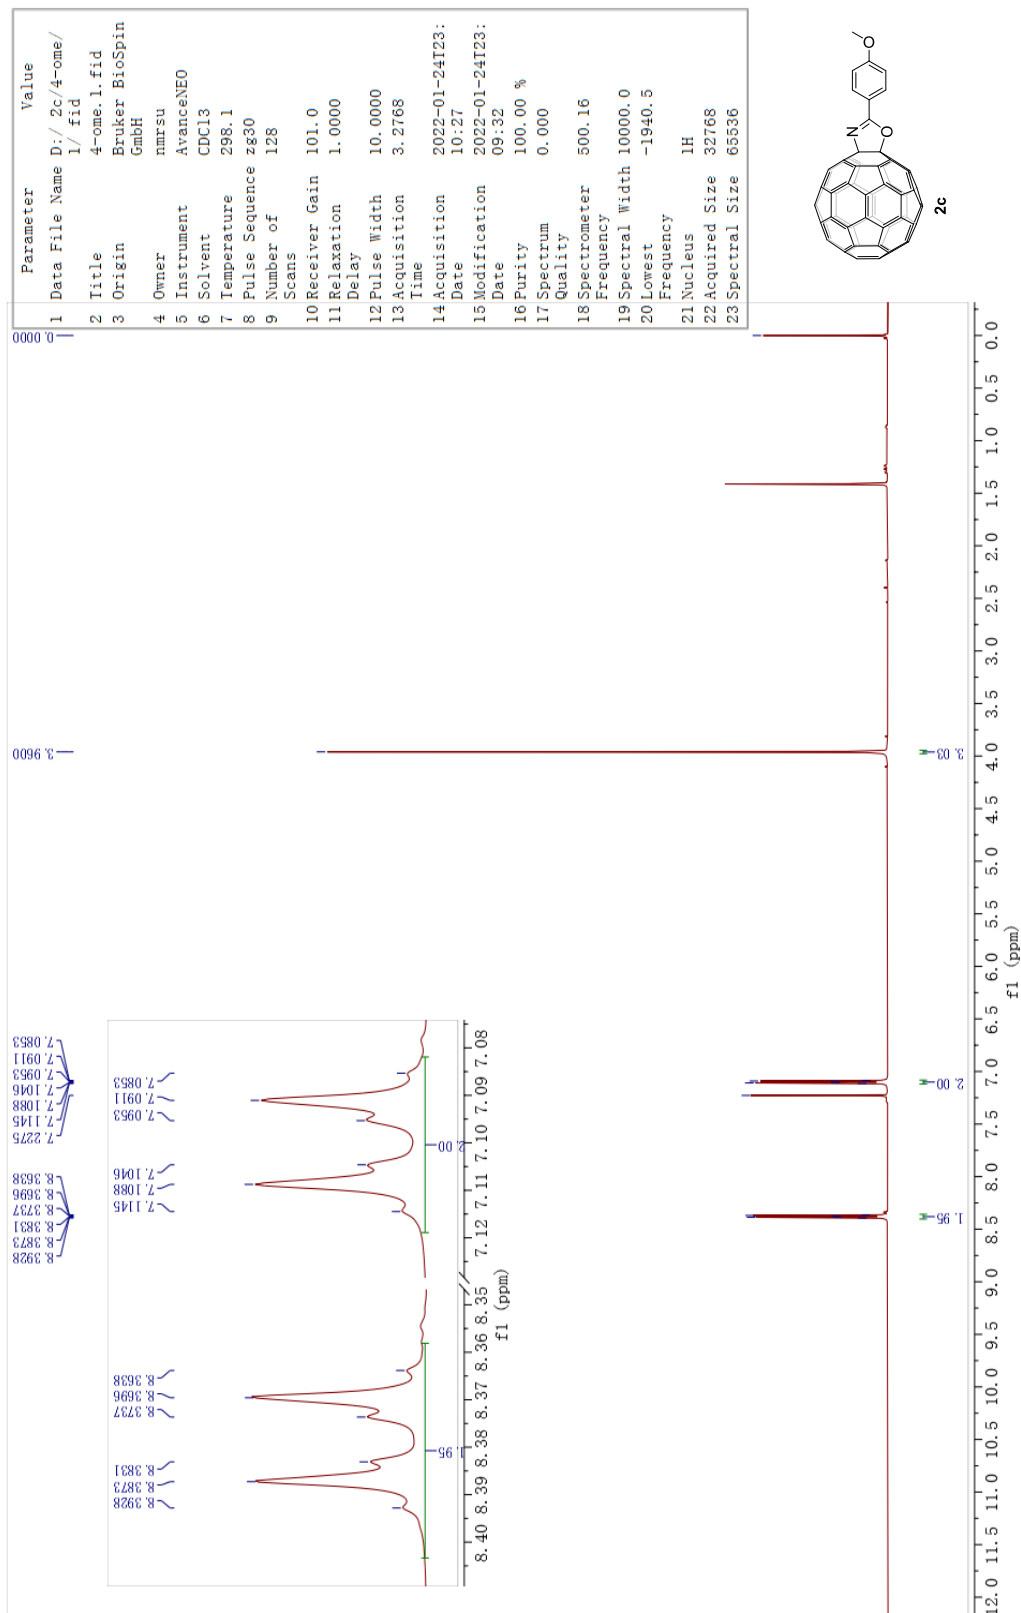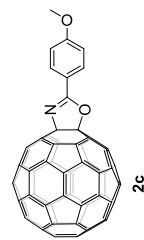

**Figure S7.**  $^1\text{H}$  NMR (500 MHz, 1:1  $\text{CS}_2/\text{CDCl}_3$ ) of **2c**.

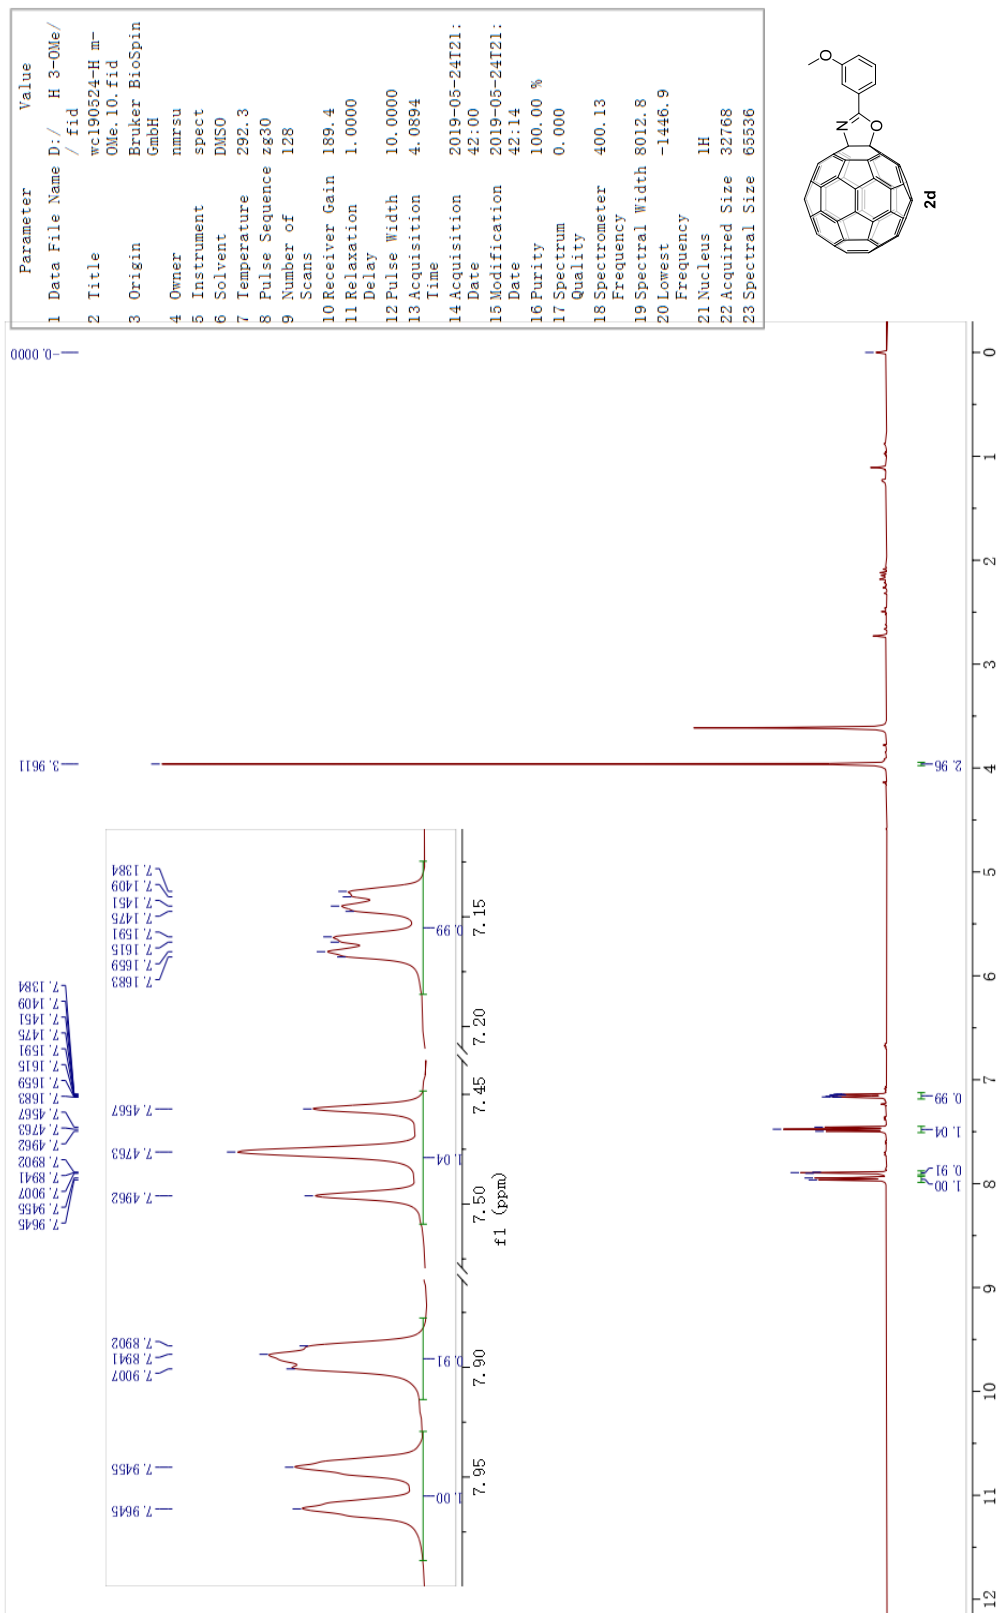

**Figure S8.** <sup>1</sup>H NMR (400 MHz, CS<sub>2</sub>/DMSO-*d*<sub>6</sub>) of **2d**.

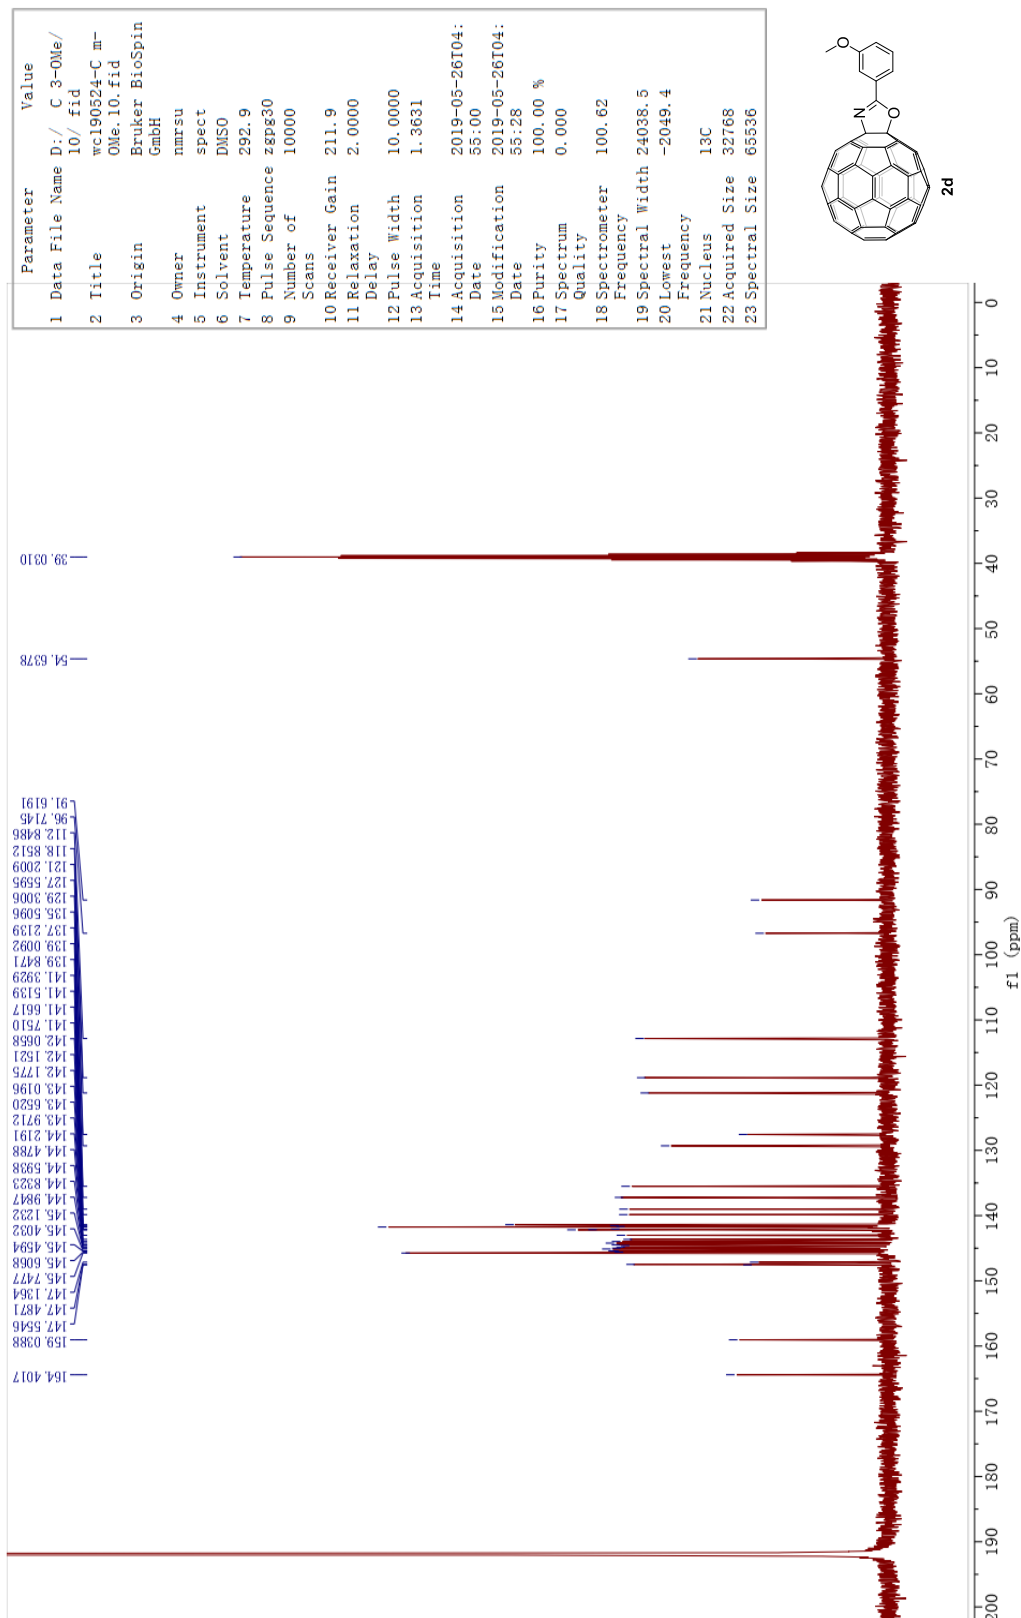

**Figure S9.**  $^{13}\text{C}$  NMR (101 MHz,  $\text{CS}_2/\text{DMSO}-d_6$ ) of **2d**.

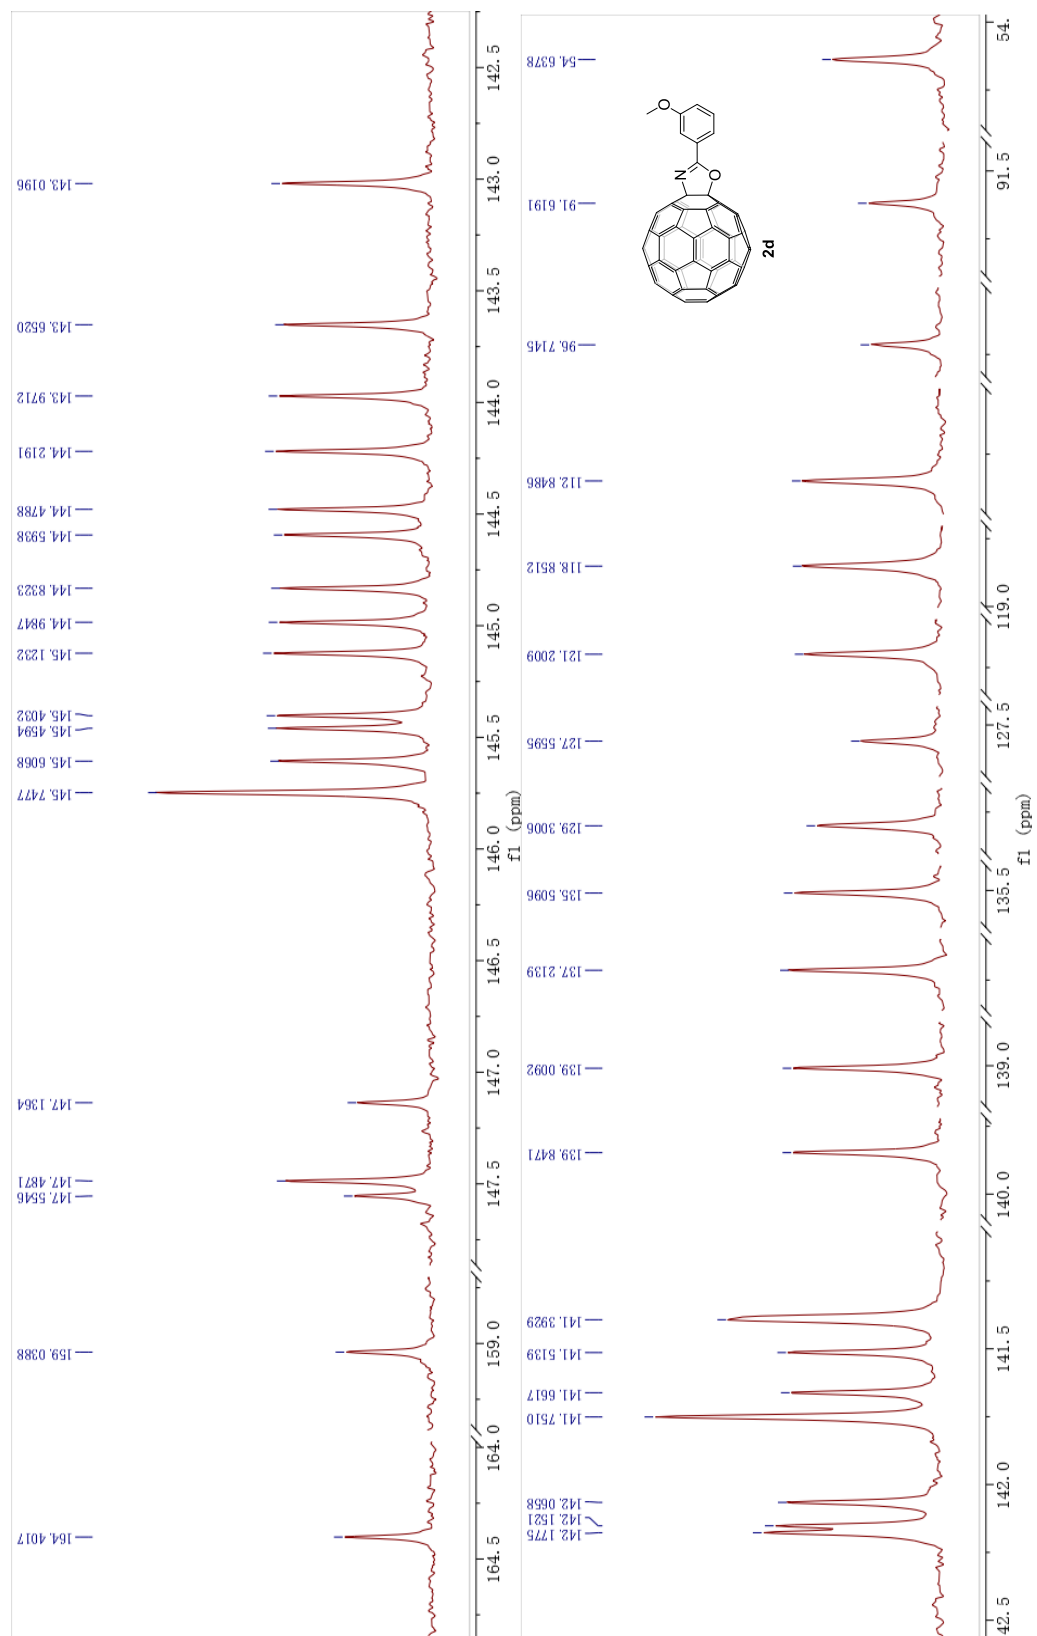

**Figure S10.** Expanded  $^{13}\text{C}$  NMR (101 MHz,  $\text{CS}_2/\text{DMSO-}d_6$ ) of **2d**.

| Parameter            | Value               |
|----------------------|---------------------|
| 1 Data File Name     | D:/4-tBu-H/fid      |
| 2 Title              | wc190429-H.         |
| 3 Origin             | Bruker BioSpin GmbH |
| 4 Owner              | nmrsu               |
| 5 Instrument         | spect               |
| 6 Solvent            | DMSO                |
| 7 Temperature        | 292.0               |
| 8 Pulse Sequence     | zg30                |
| 9 Number of Scans    | 128                 |
| 10 Receiver Gain     | 168.1               |
| 11 Relaxation Delay  | 1.0000              |
| 12 Pulse Width       | 10.0000             |
| 13 Acquisition Time  | 4.0894              |
| 14 Acquisition Date  | 2019-04-30T08:18:00 |
| 15 Modification Date | 2019-04-30T08:18:18 |
| 16 Furity            | 100.00 %            |
| 17 Spectrum Quality  | 0.000               |
| 18 Spectrometer      | 400.13              |
| 19 Spectral Width    | 8012.8              |
| 20 Lowest Frequency  | -1447.9             |
| 21 Nucleus           | <sup>1</sup> H      |
| 22 Acquired Size     | 32768               |
| 23 Spectral Size     | 65536               |

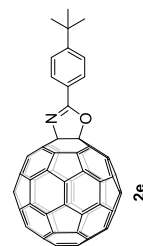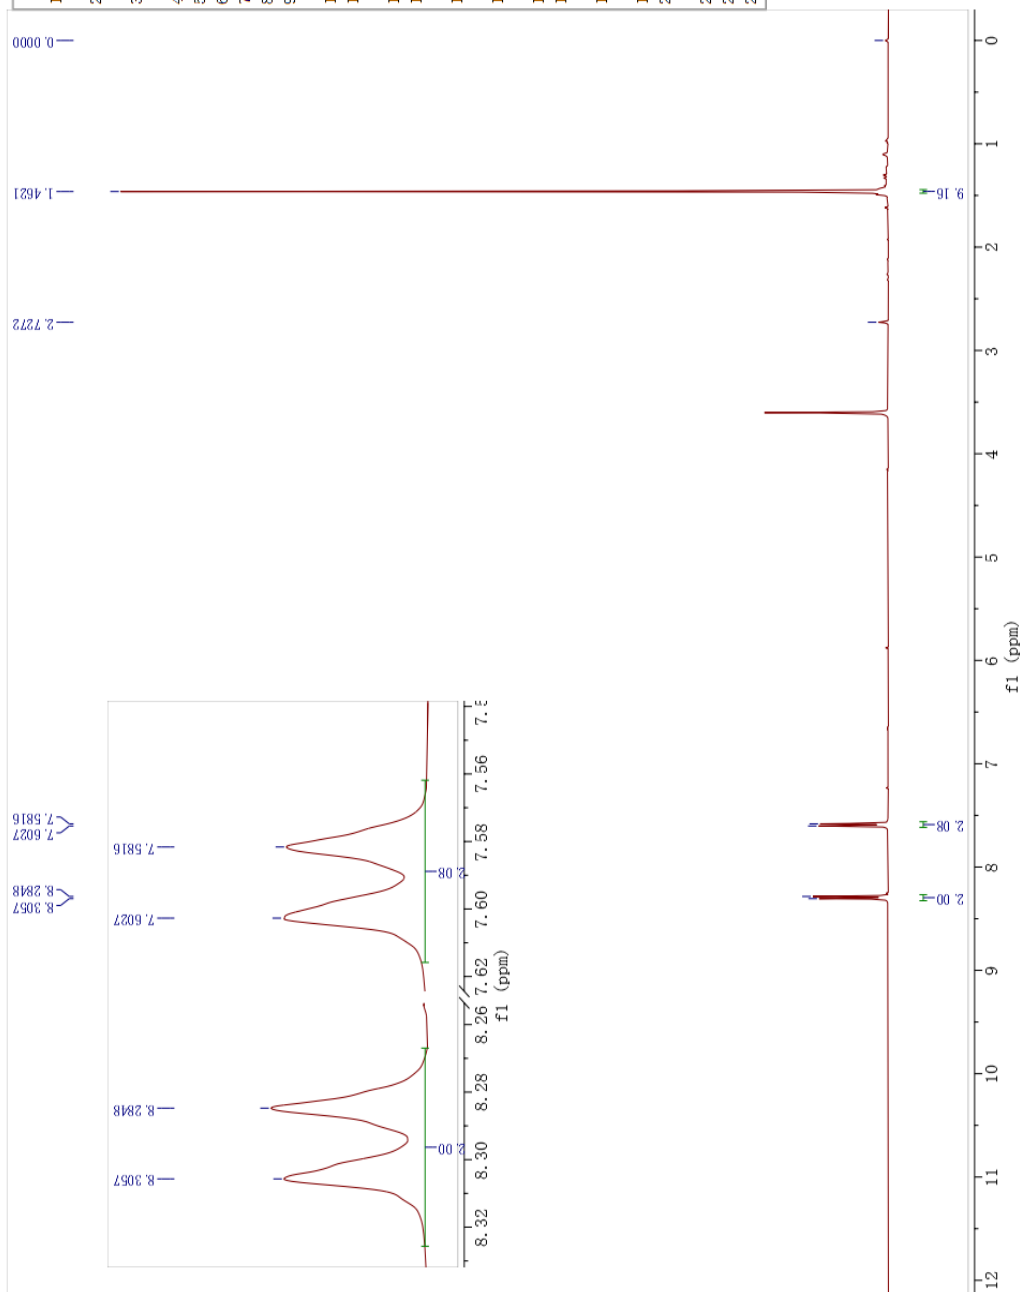

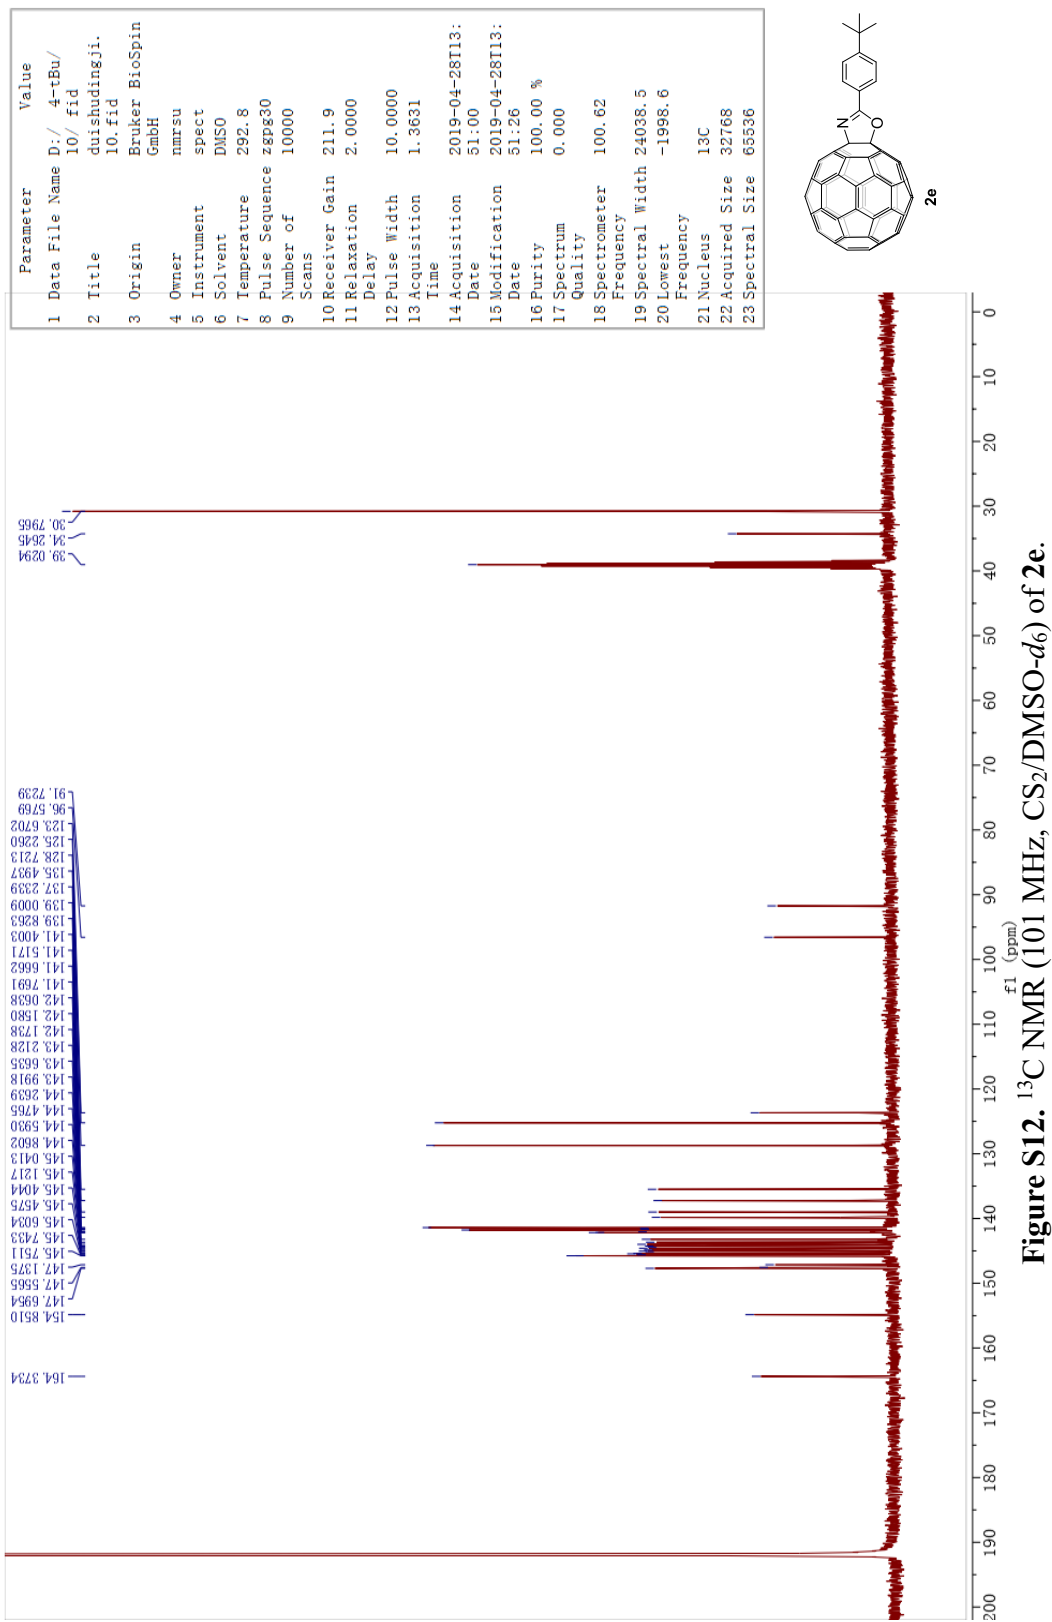

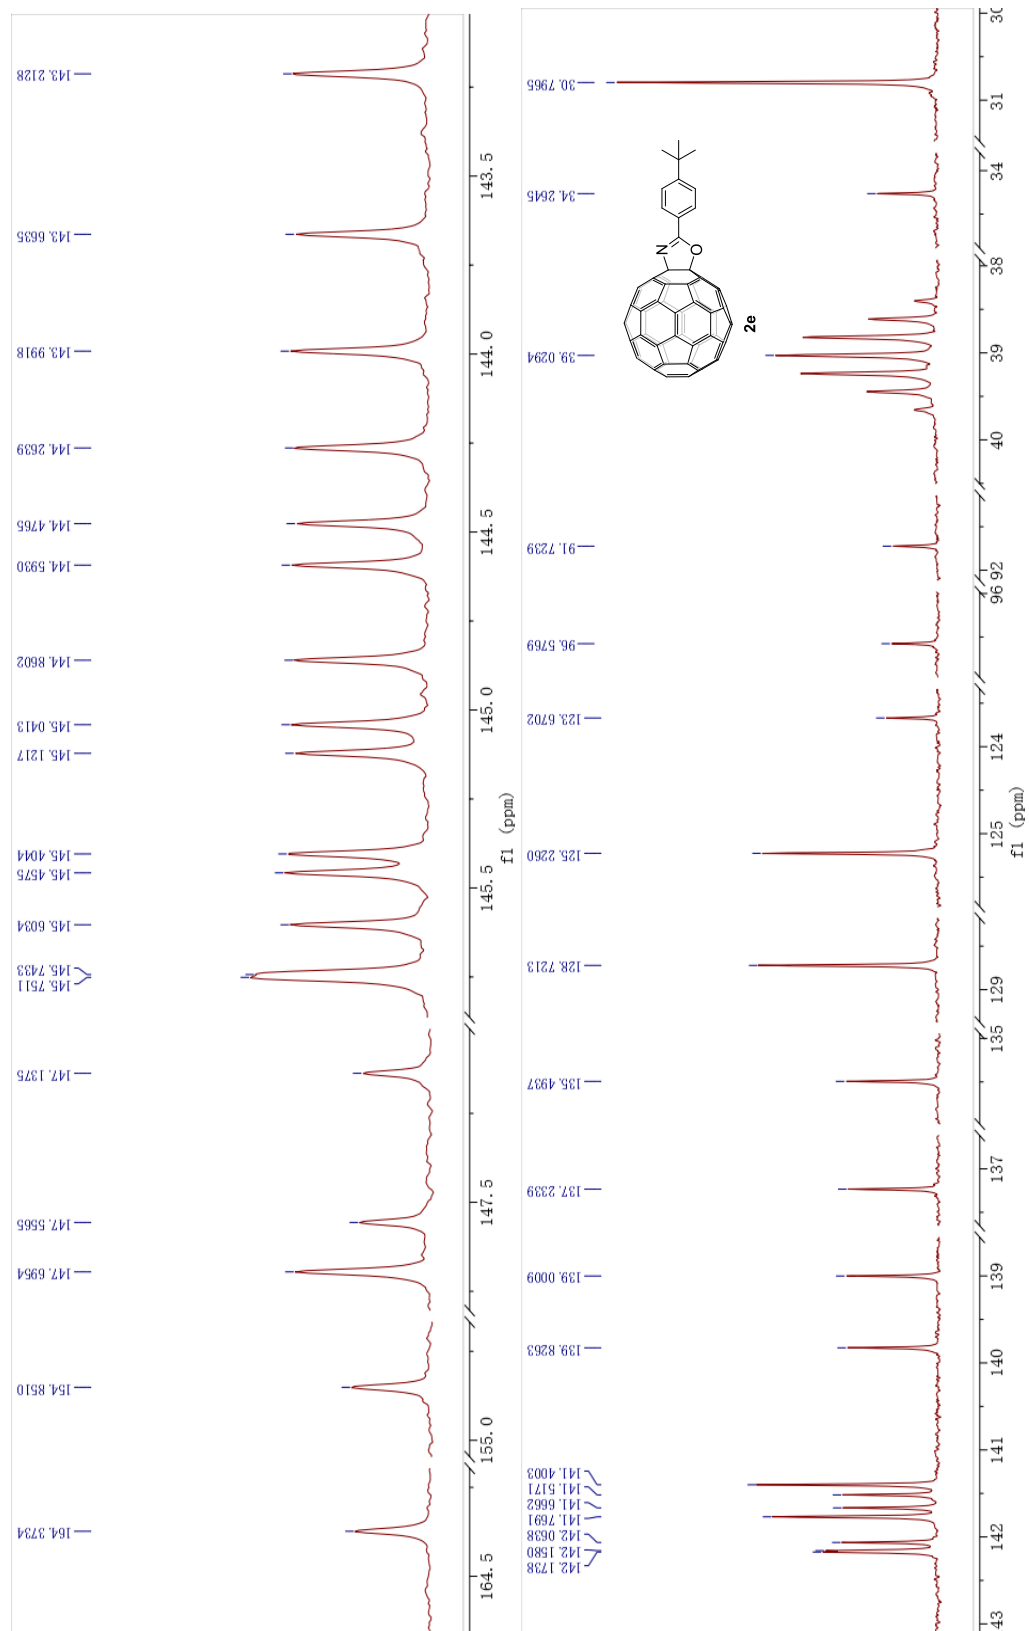

**Figure S13.** Expanded <sup>13</sup>C NMR (101 MHz, CS<sub>2</sub>/DMSO-*d*<sub>6</sub>) of **2e**.





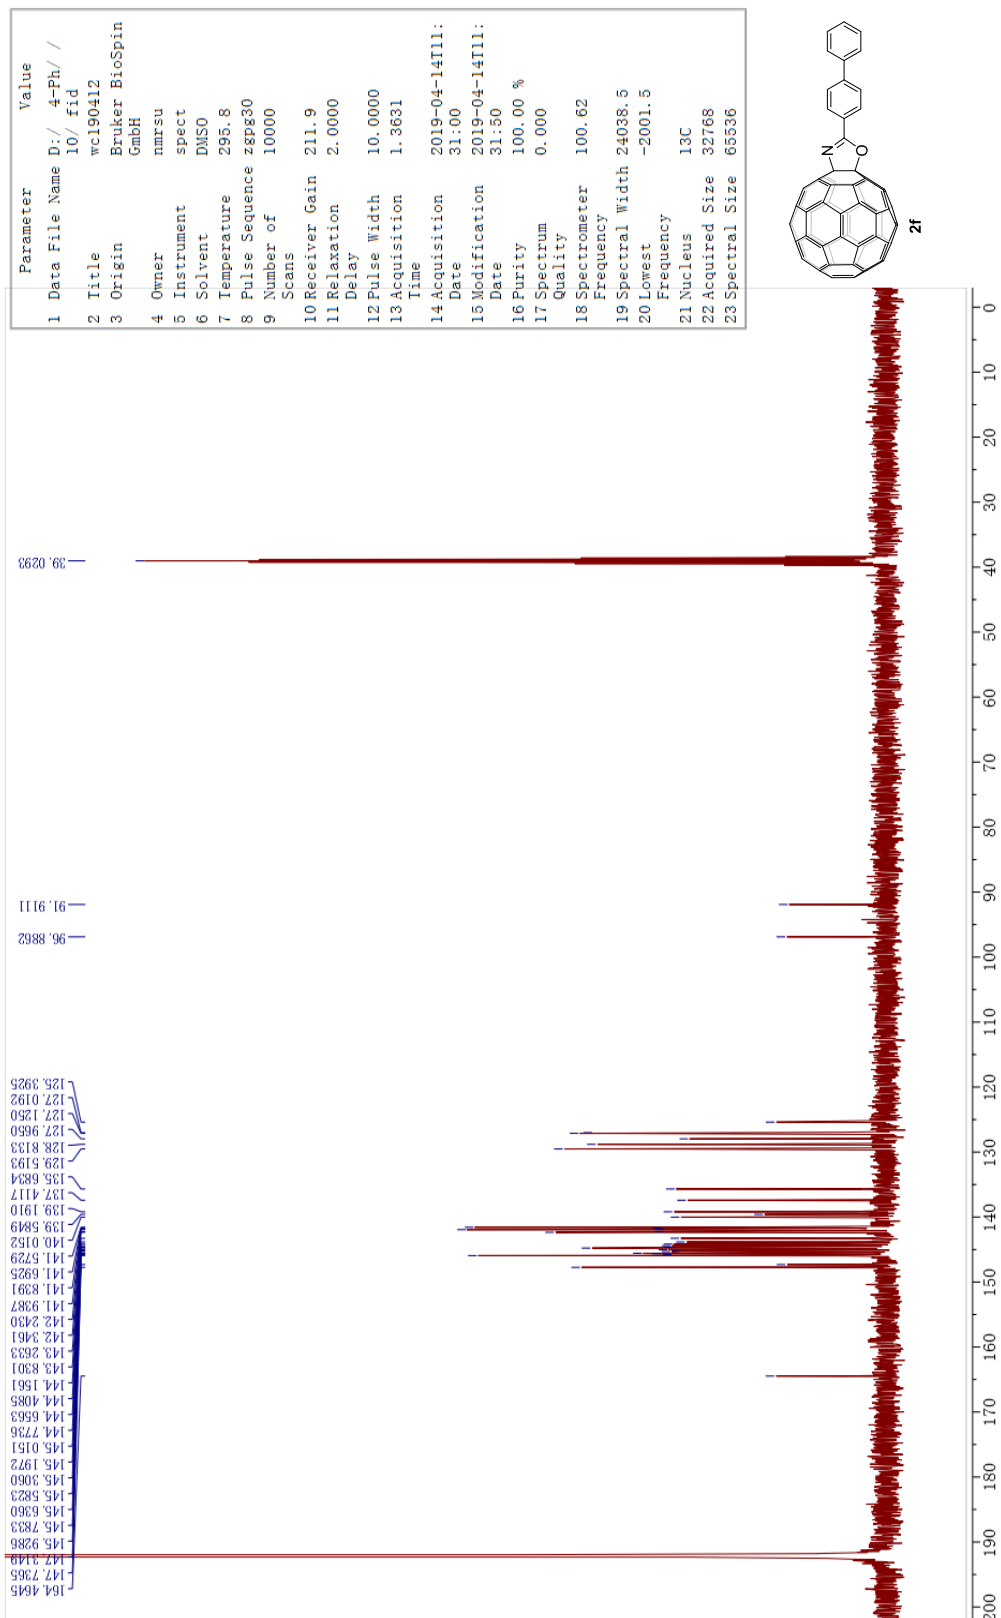

**Figure S15.**  $^{13}\text{C}$  NMR (101 MHz,  $\text{CS}_2/\text{DMSO}-d_6$ ) of **2f**.

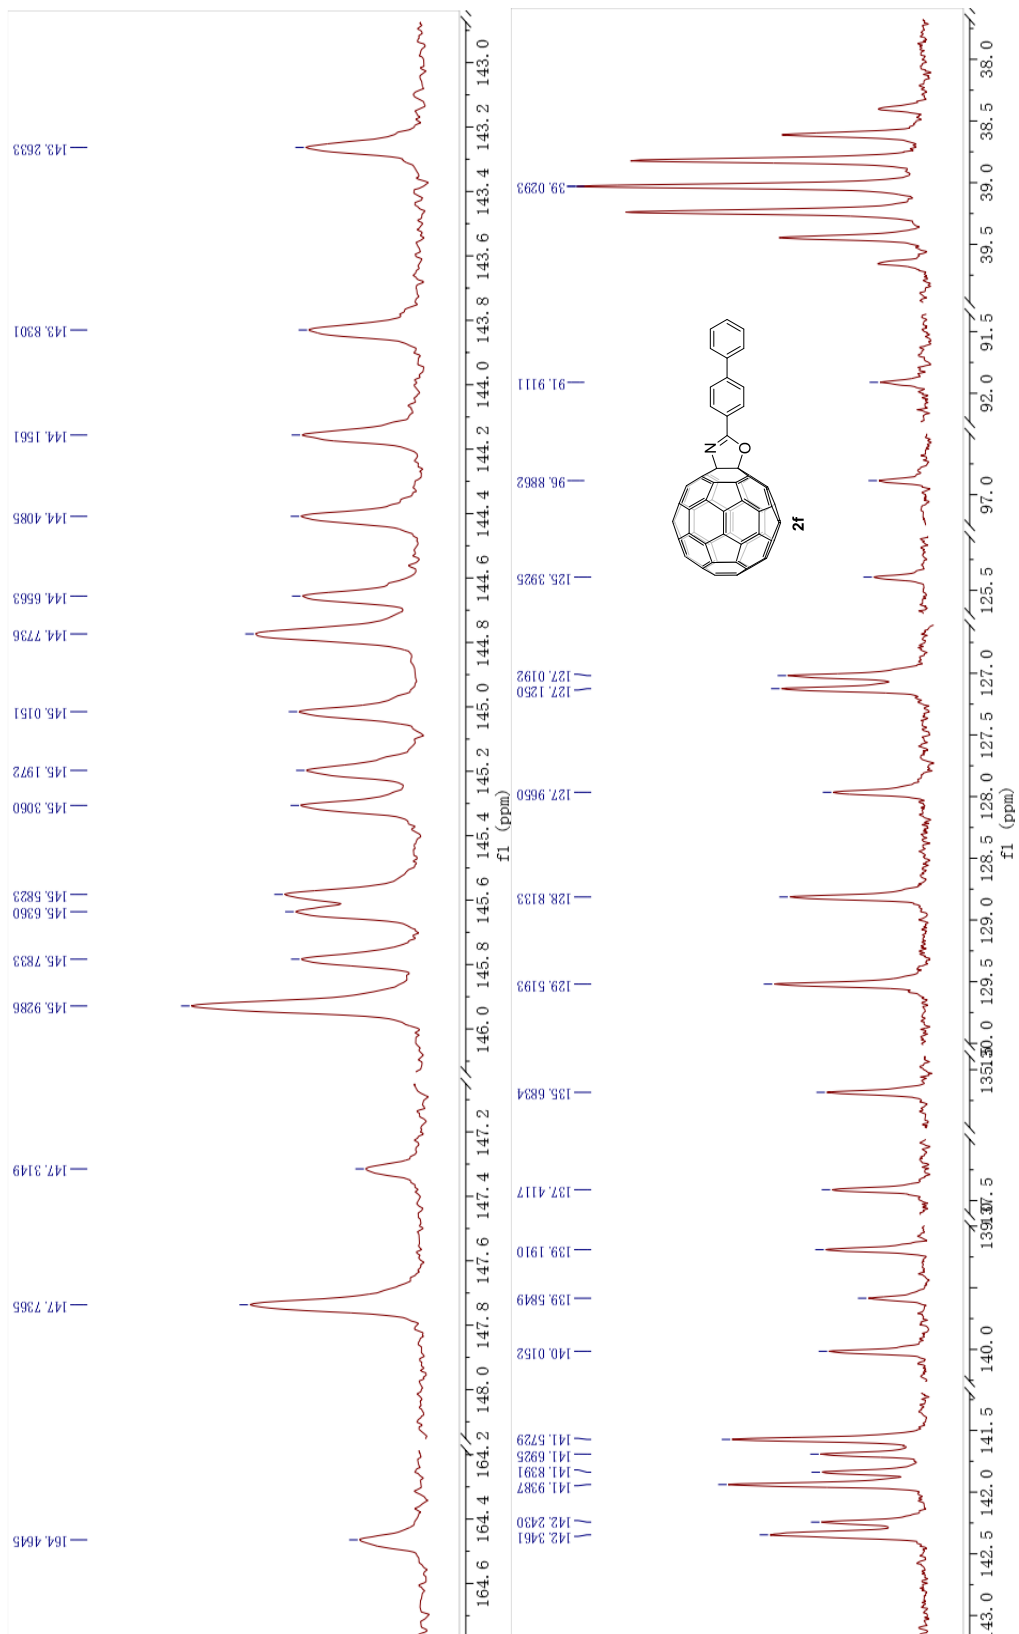

**Figure S16.** Expanded  $^{13}\text{C}$  NMR (101 MHz,  $\text{CS}_2/\text{DMSO}-d_6$ ) of **2f**.

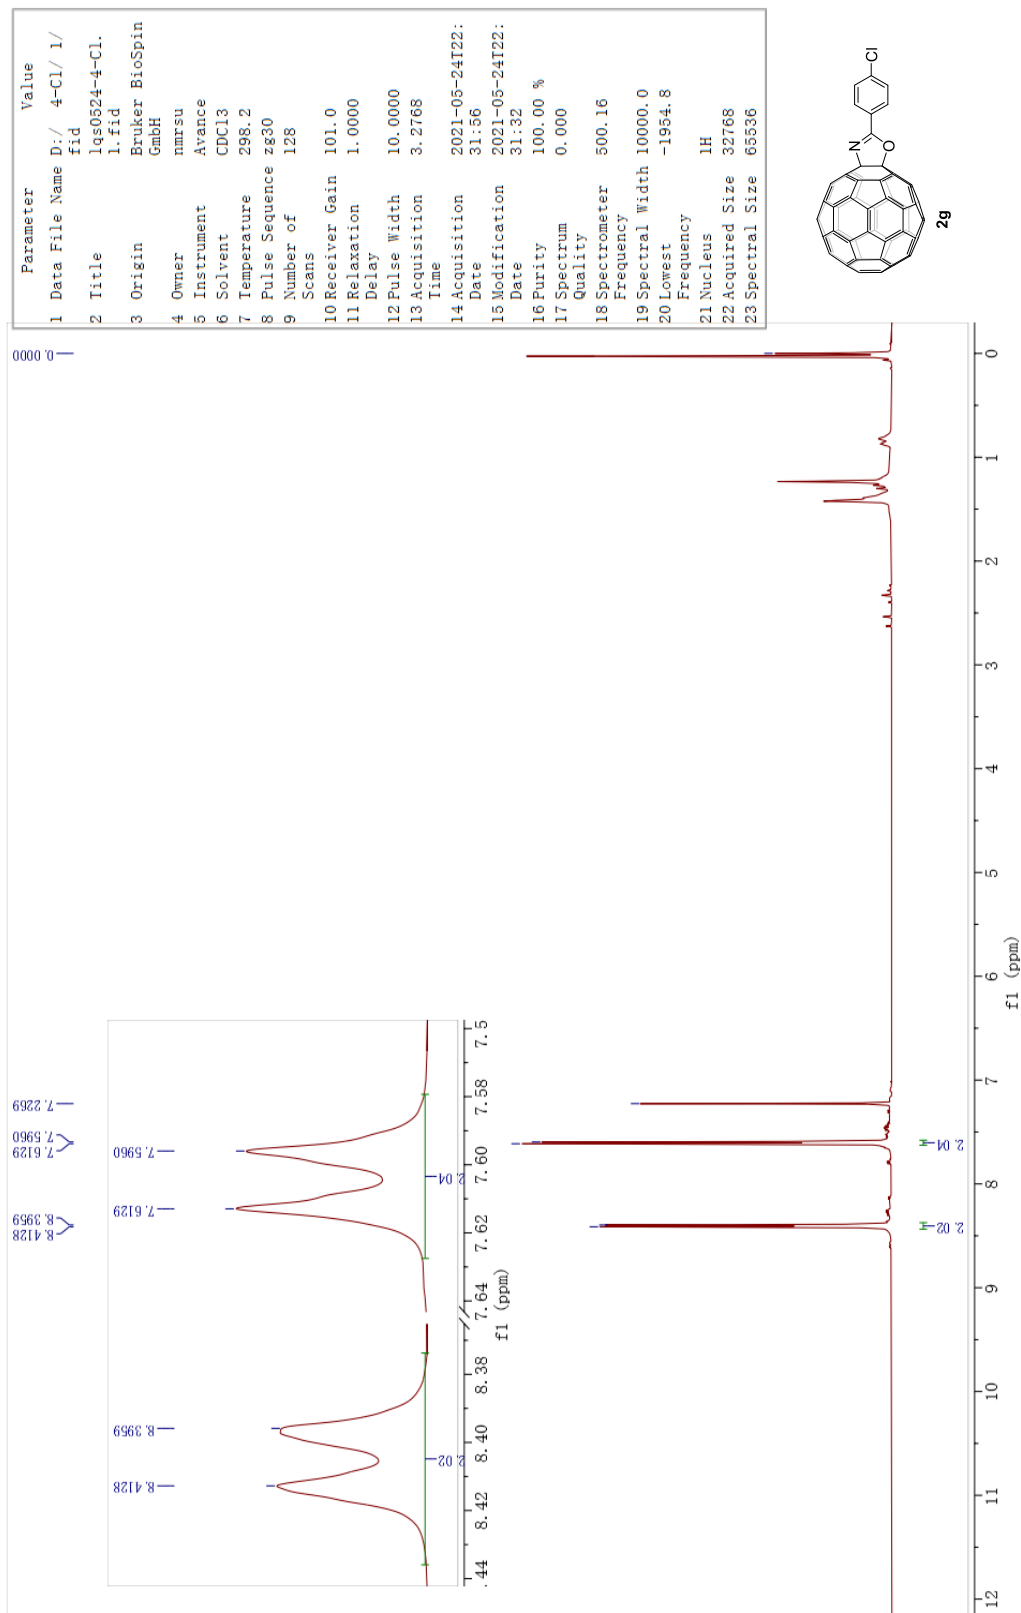

**Figure S17.**  $^1\text{H}$  NMR (500 MHz, 1:1  $\text{CS}_2/\text{CDCl}_3$ ) of **2g**.

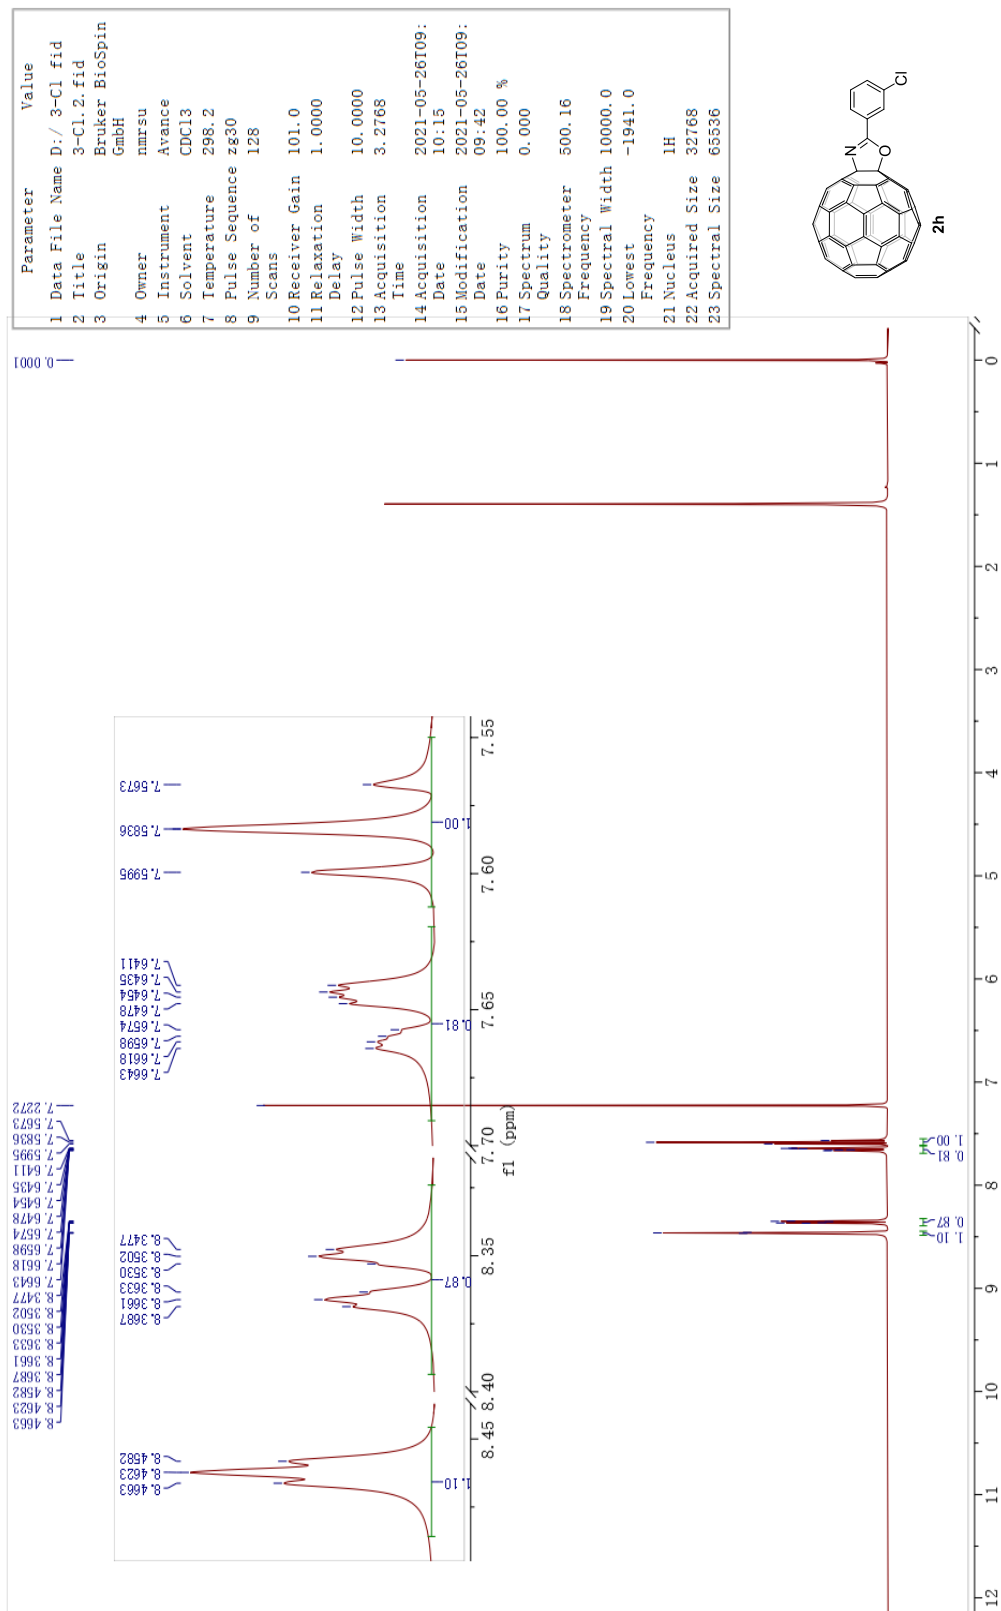

**Figure S18.** <sup>1</sup>H NMR (500 MHz, 1:1 CS<sub>2</sub>/CDCl<sub>3</sub>) of **2h**.

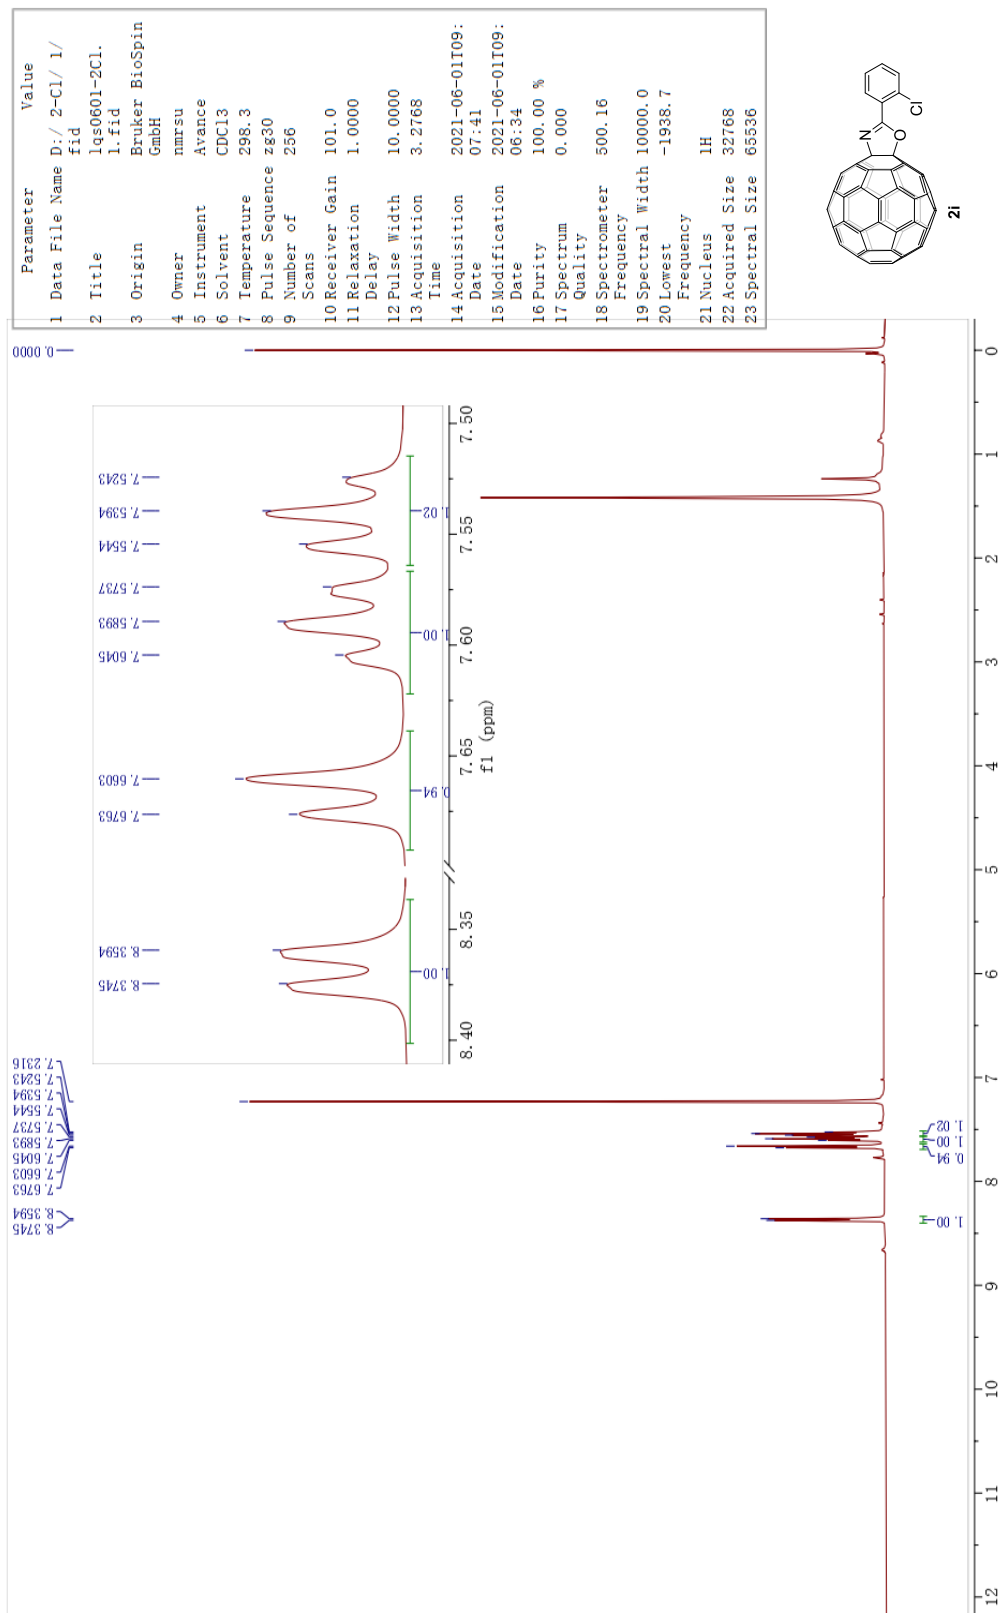

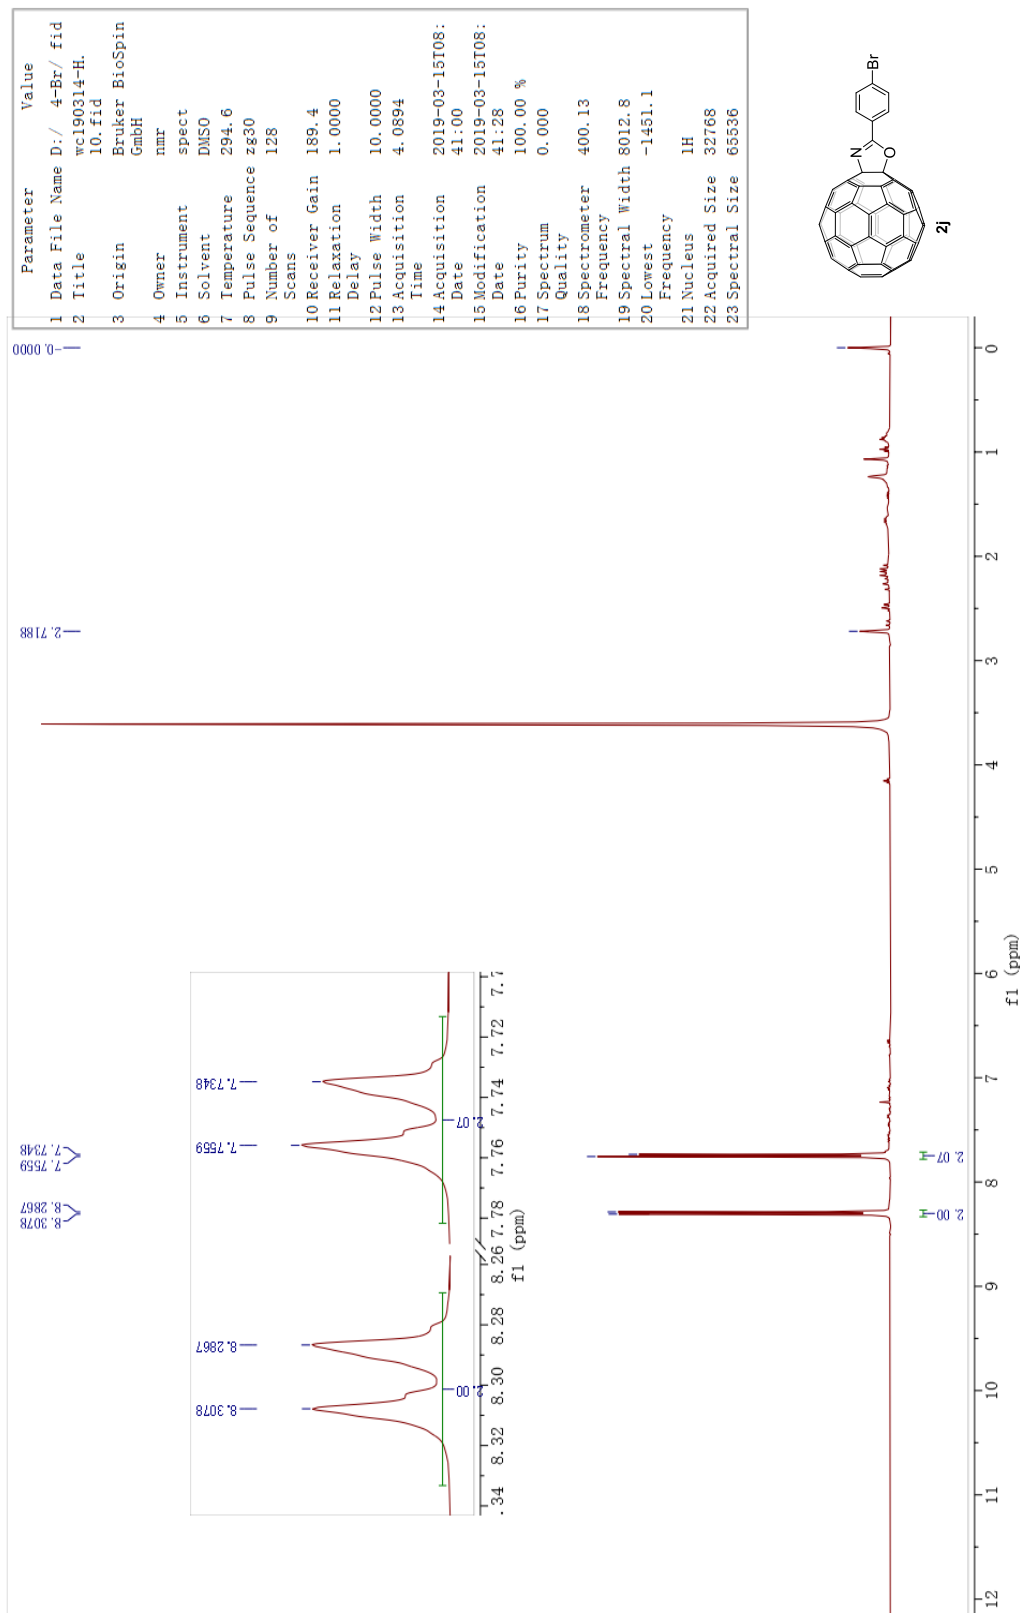

**Figure S20.**  $^1\text{H}$  NMR (400 MHz,  $\text{CS}_2/\text{DMSO-}d_6$ ) of **2j**.

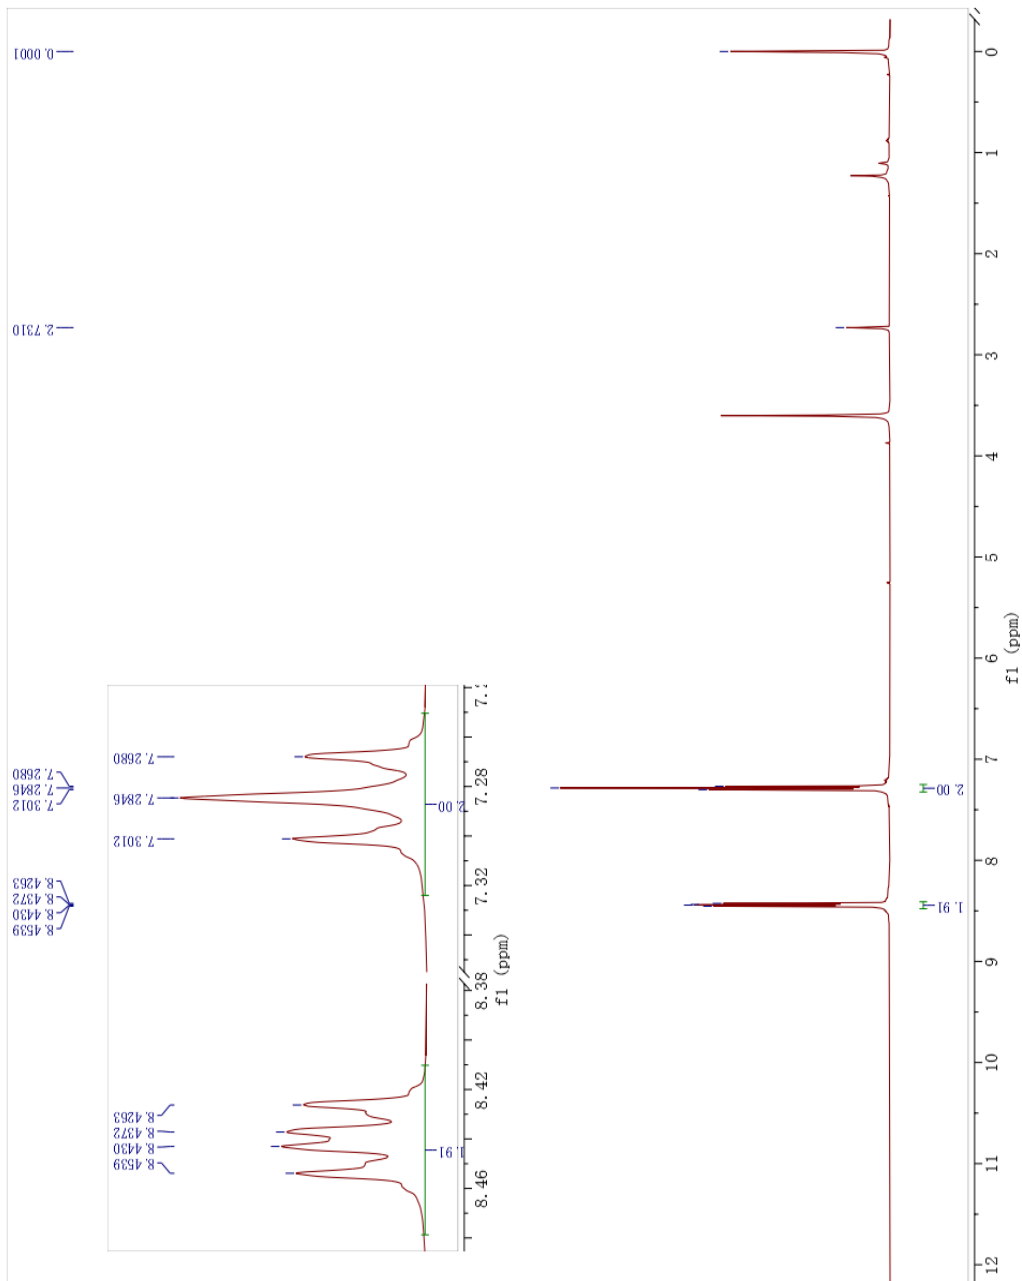

| Parameter                    | Value                   |
|------------------------------|-------------------------|
| 1 Data File Name             | D:/ 4-F/ 4-F-<br>H/ fid |
| 2 Title                      | lqs-20201006.1<br>.fid  |
| 3 Origin                     | Bruker BioSpin<br>GmbH  |
| 4 Owner                      | nmrsu                   |
| 5 Instrument                 | AvanceNEO               |
| 6 Solvent                    | DMSO                    |
| 7 Temperature                | 294.3                   |
| 8 Pulse Sequence             | zg30                    |
| 9 Number of<br>Scans         | 64                      |
| 10 Receiver Gain             | 101.0                   |
| 11 Relaxation<br>Delay       | 1.0000                  |
| 12 Pulse Width               | 10.0000                 |
| 13 Acquisition<br>Time       | 3.2768                  |
| 14 Acquisition<br>Date       | 2020-11-07T22:<br>59:51 |
| 15 Modification<br>Date      | 2020-11-07T22:<br>59:22 |
| 16 Purity                    | 100.00 %                |
| 17 Spectrum<br>Quality       | 0.000                   |
| 18 Spectrometer<br>Frequency | 500.16                  |
| 19 Spectral Width            | 10000.0                 |
| 20 Lowest<br>Frequency       | -1800.4                 |
| 21 Nucleus                   | 1H                      |
| 22 Acquired Size             | 32768                   |
| 23 Spectral Size             | 65536                   |

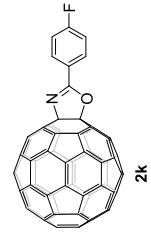

**Figure S21.** <sup>1</sup>H NMR (500 MHz, CS<sub>2</sub>/DMSO-*d*<sub>6</sub>) of **2k**.



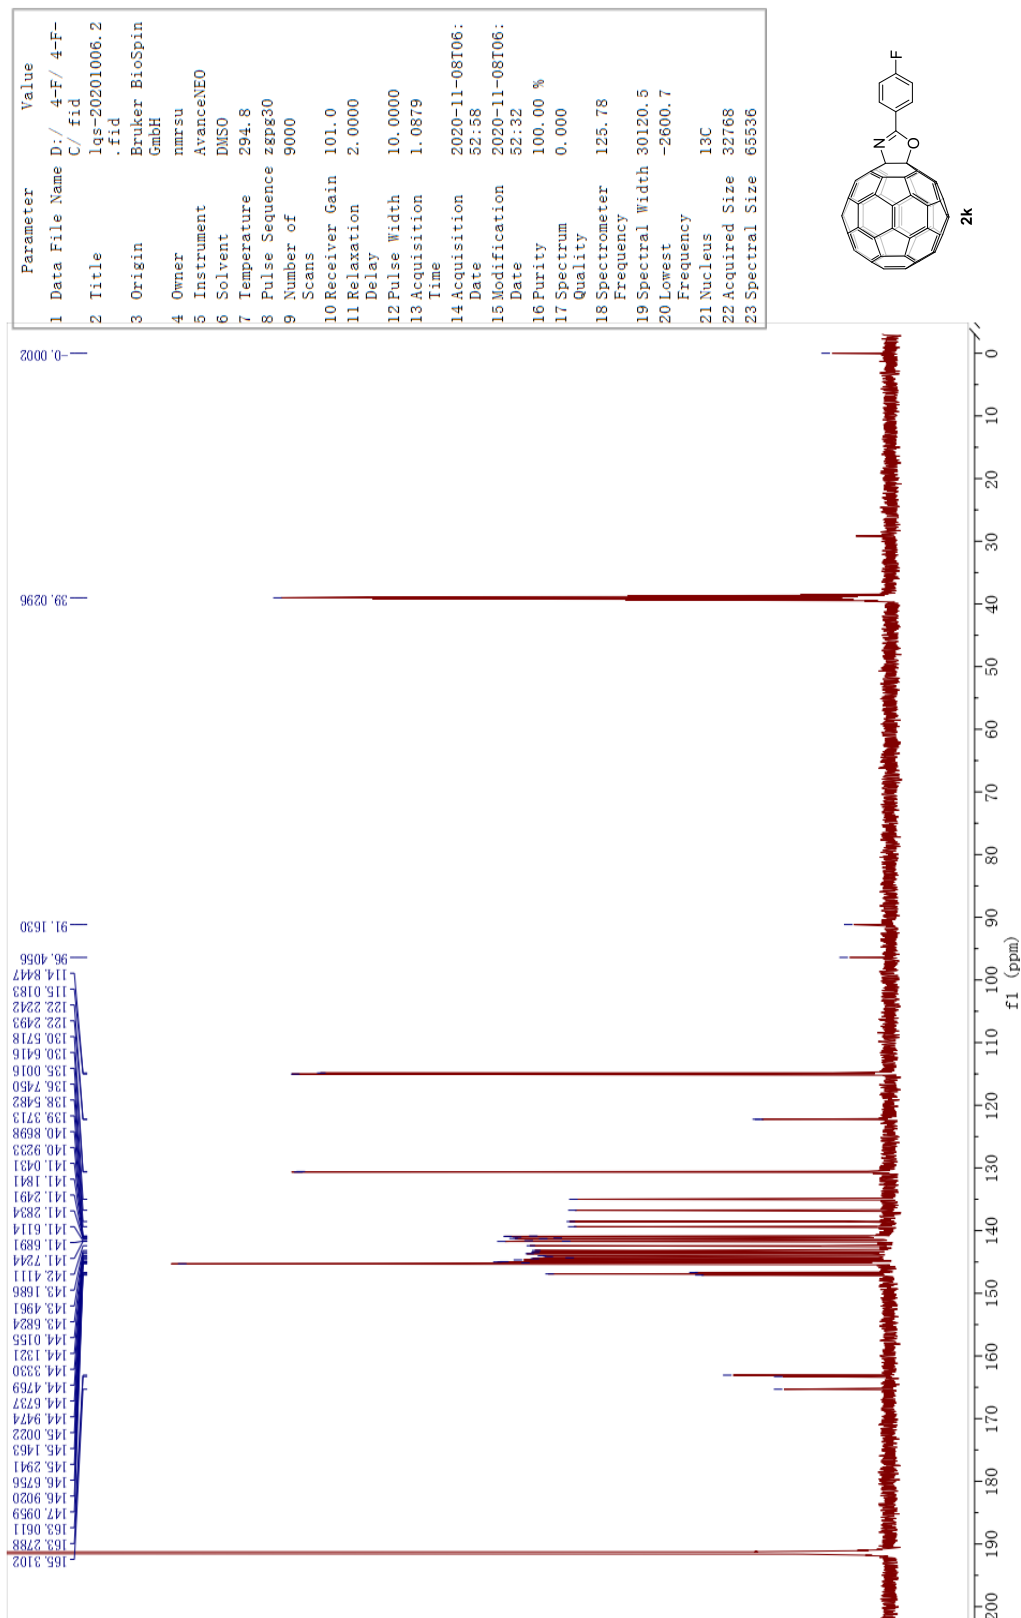

**Figure S22.**  $^{13}\text{C}$  NMR (126 MHz,  $\text{CS}_2/\text{DMSO}-d_6$ ) of **2k**.

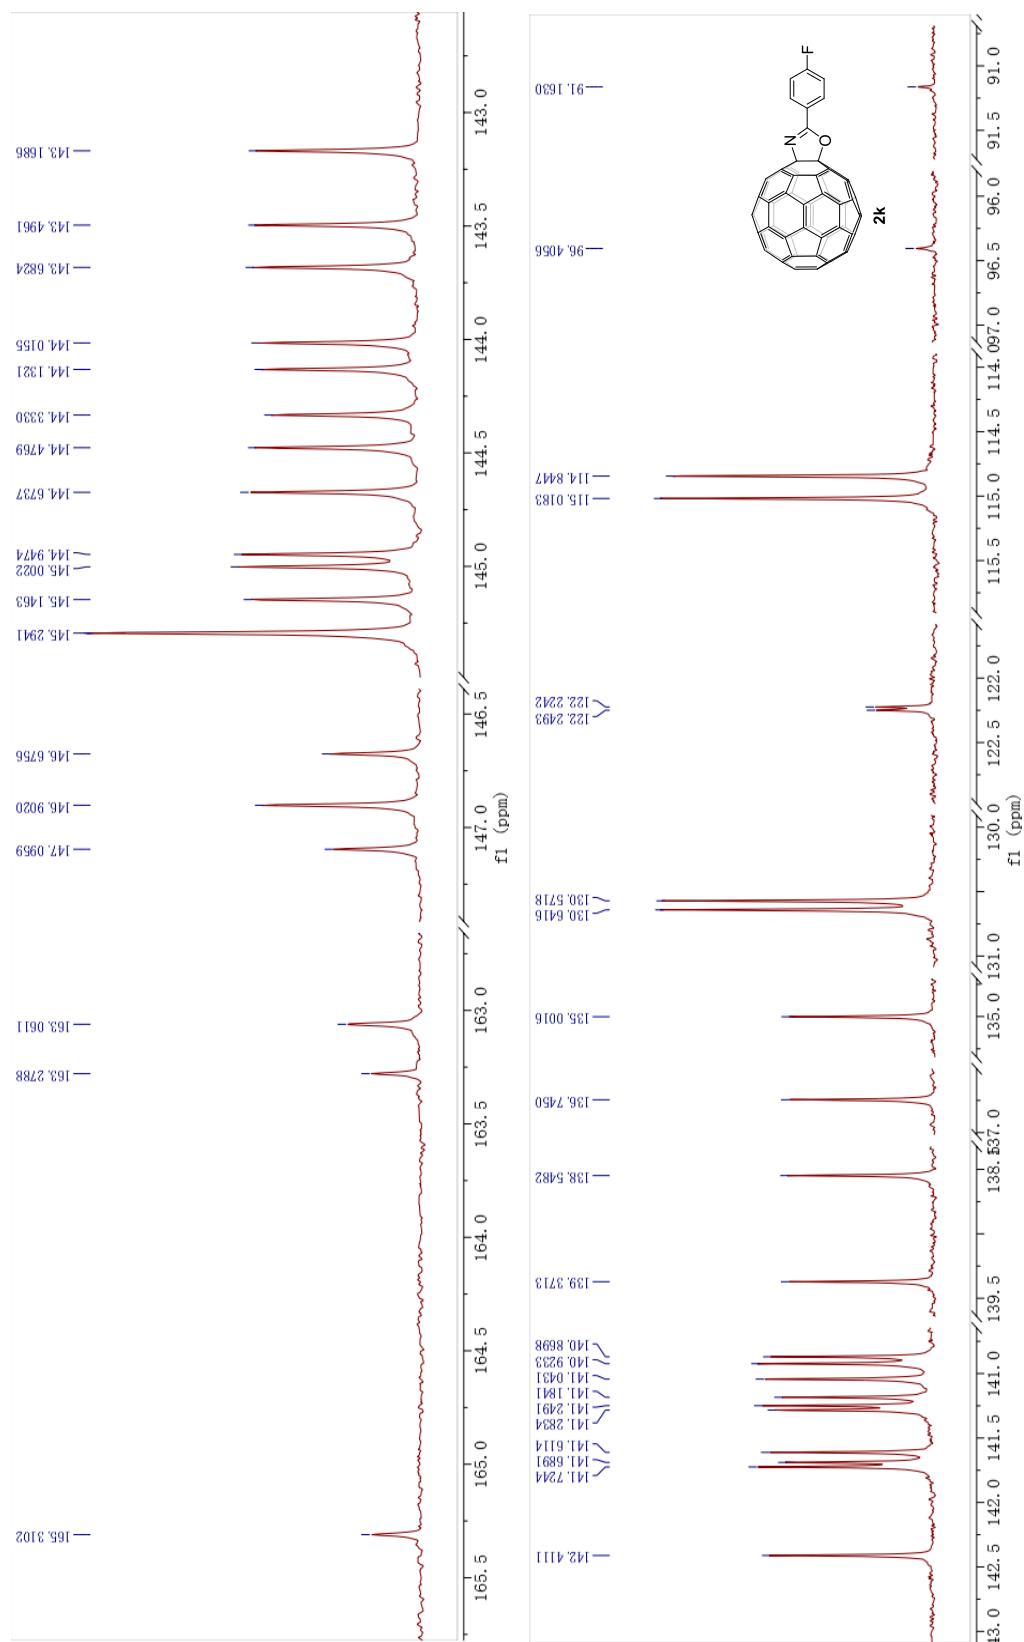

**Figure S23.** Expanded  $^{13}\text{C}$  NMR (126 MHz,  $\text{CS}_2/\text{DMSO-}d_6$ ) of **2k**.

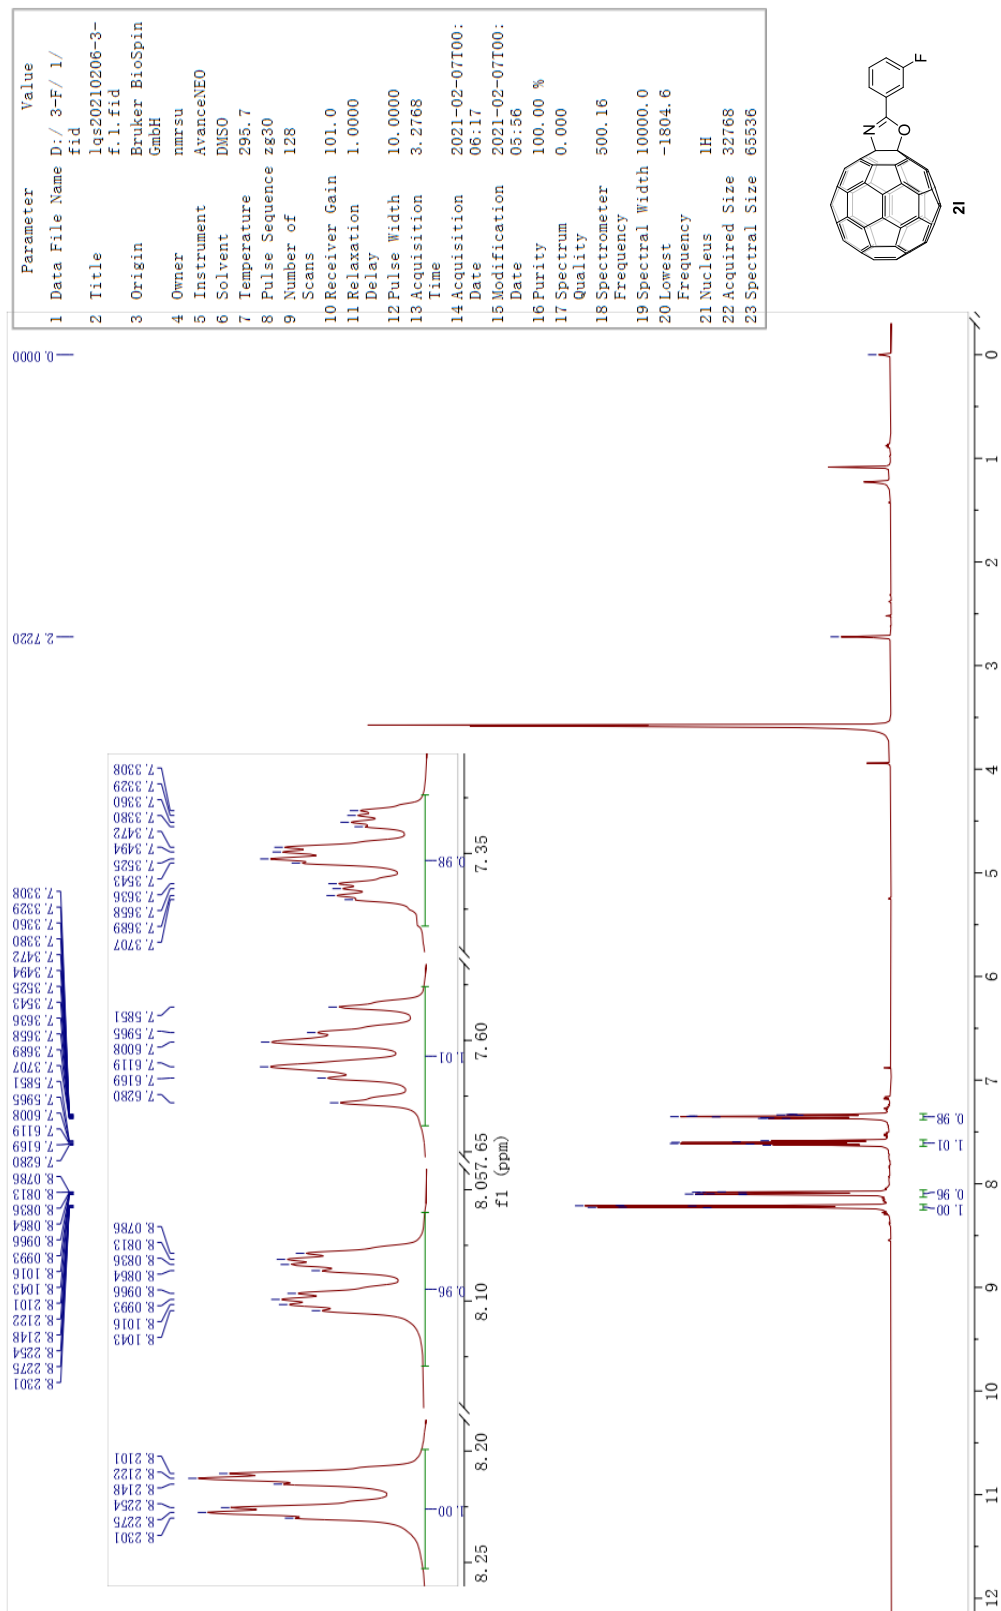

**Figure S24.** <sup>1</sup>H NMR (500 MHz, CS<sub>2</sub>/DMSO-*d*<sub>6</sub>) of **21**.

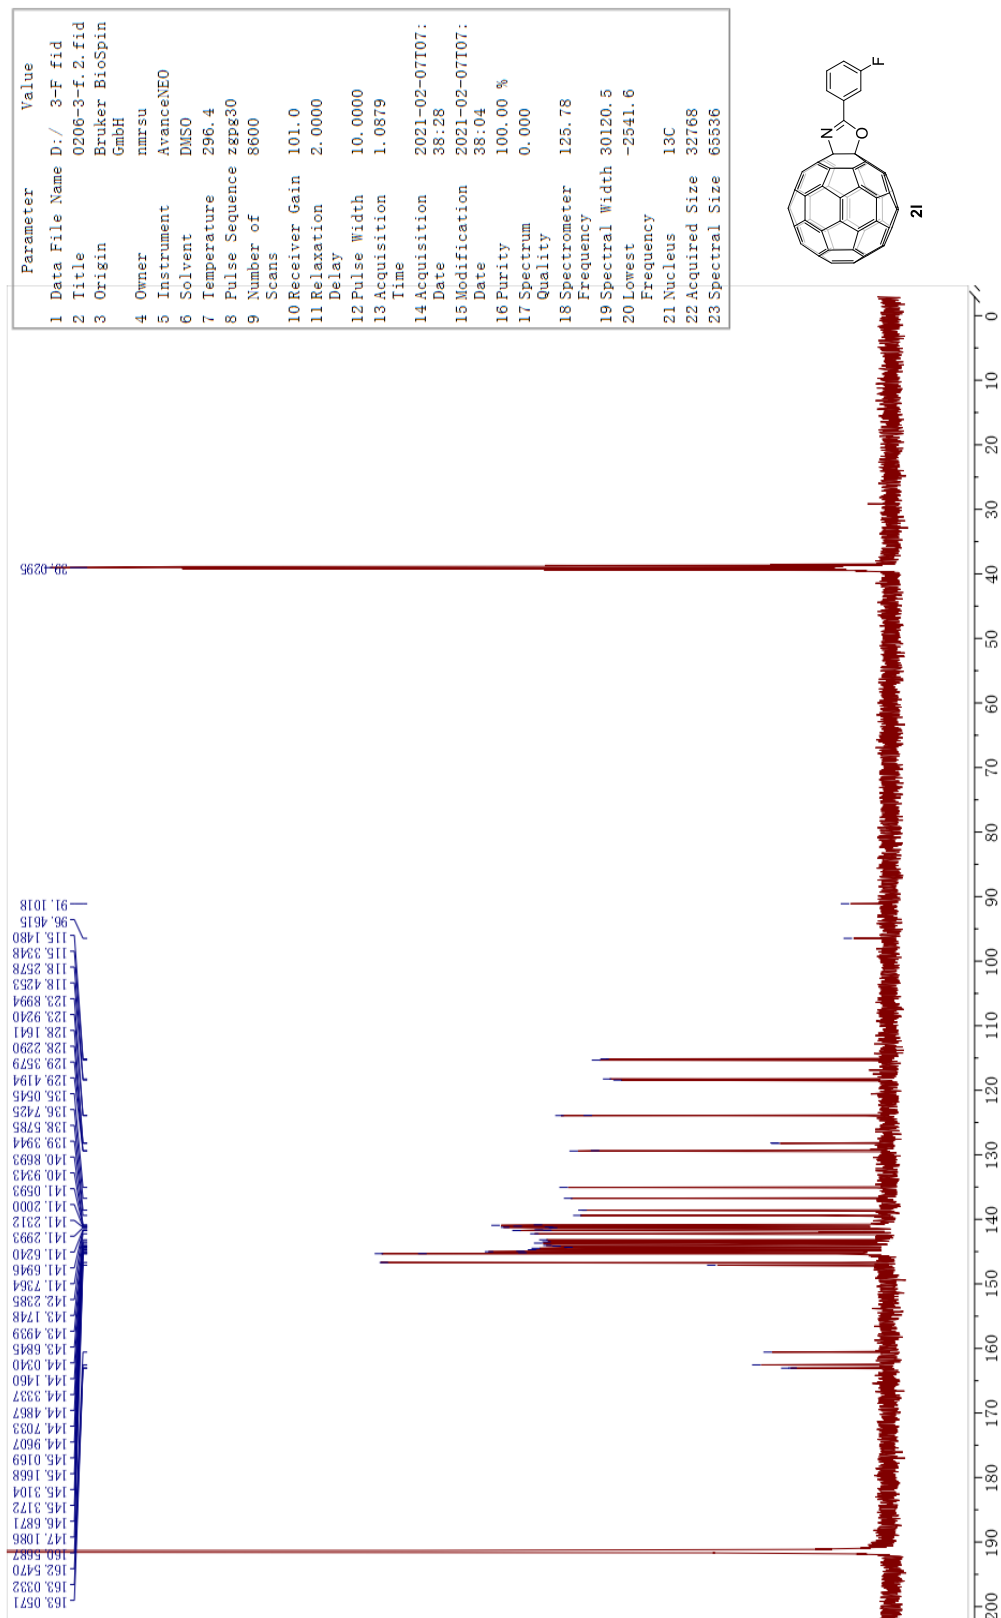

Figure S25. <sup>13</sup>C NMR (126 MHz, CS<sub>2</sub>/DMSO-*d*<sub>6</sub>) of 21.

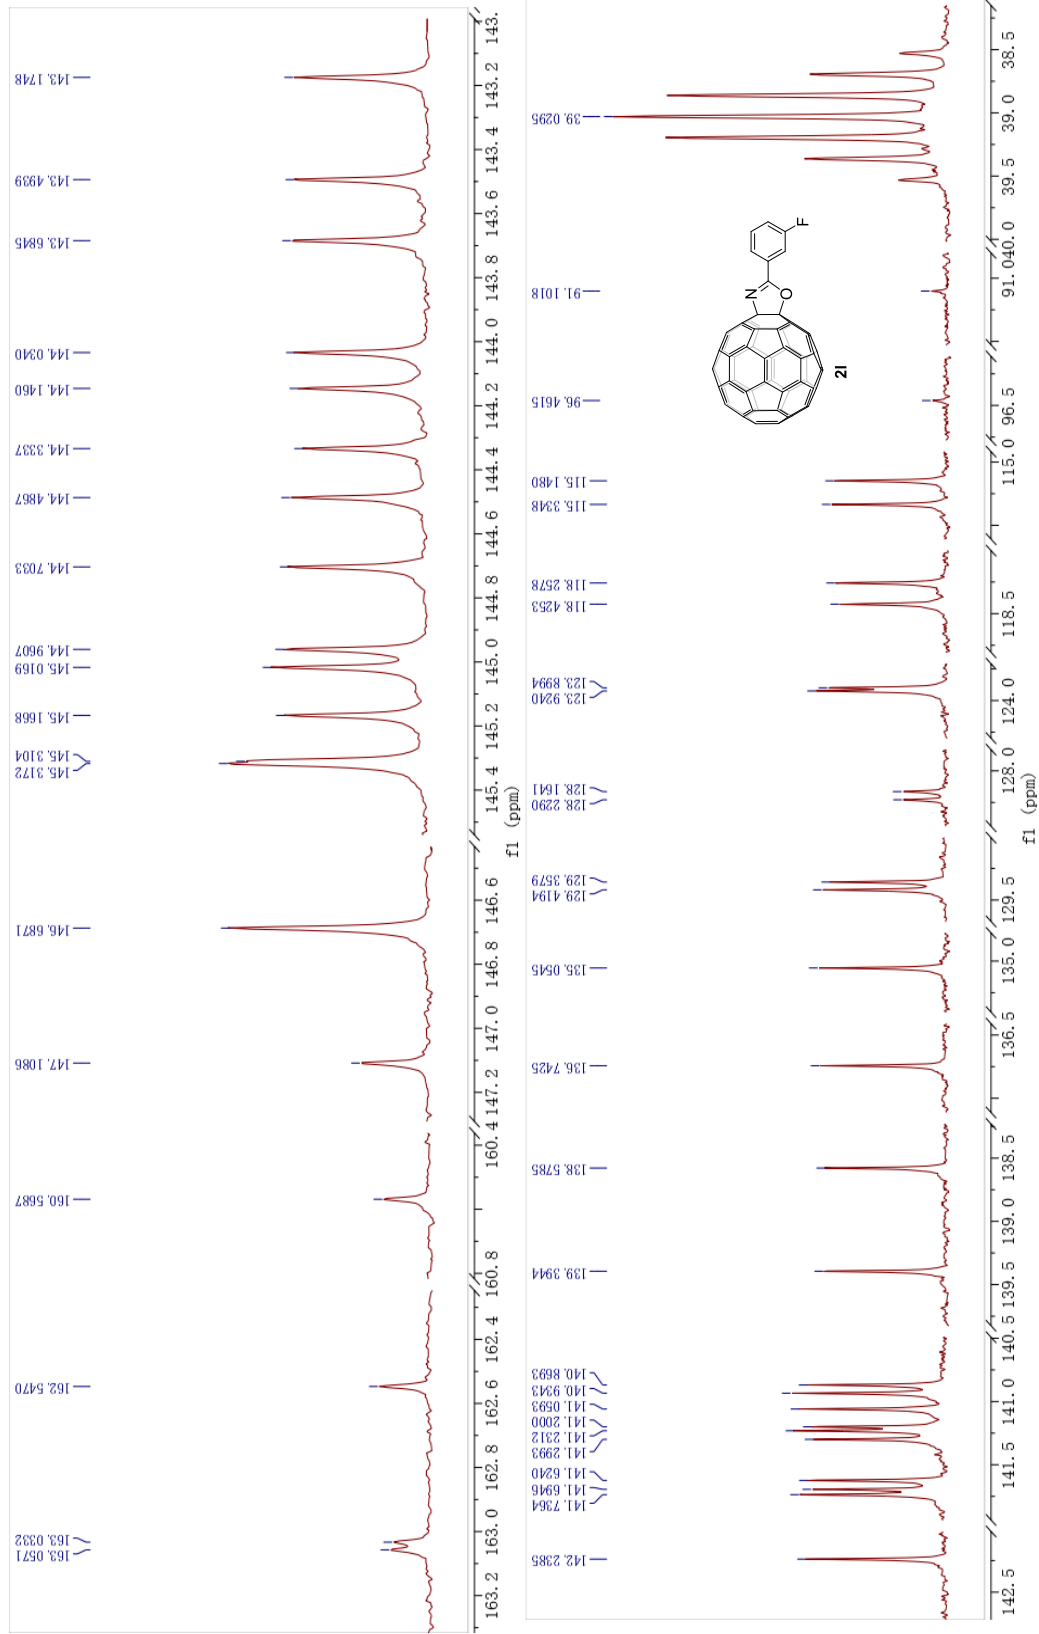

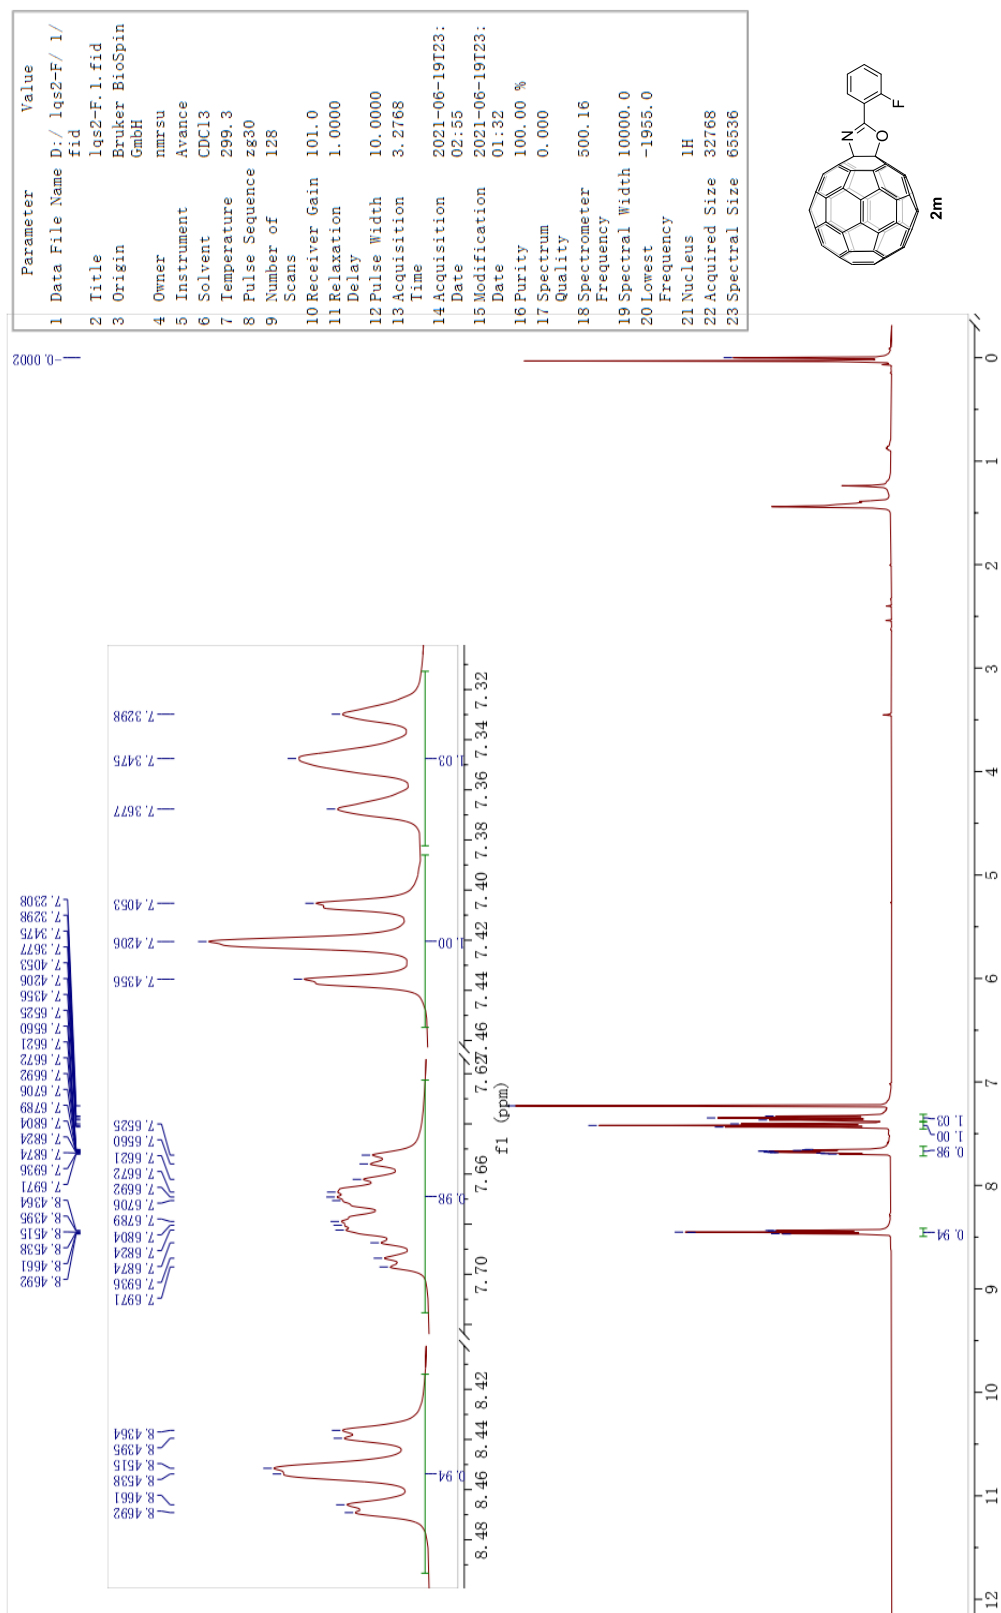

**Figure S27.**  $^1\text{H}$  NMR (500 MHz, 1:1  $\text{CS}_2/\text{CDCl}_3$ ) of **2m**.

| Parameter                 | Value               |
|---------------------------|---------------------|
| 1 Data File Name          | D:\lqs2-F\4\fid     |
| 2 Title                   | lqs2-F. 4.fid       |
| 3 Origin                  | Bruker BioSpin GmbH |
| 4 Owner                   | nmrsu               |
| 5 Instrument              | Avance              |
| 6 Solvent                 | CDCl3               |
| 7 Temperature             | 299.4               |
| 8 Pulse Sequence          | zgpg30              |
| 9 Number of Scans         | 8600                |
| 10 Receiver Gain          | 101.0               |
| 11 Relaxation Delay       | 2.0000              |
| 12 Pulse Width            | 10.0000             |
| 13 Acquisition Time       | 1.0879              |
| 14 Acquisition Date       | 2021-06-28T06:44:47 |
| 15 Modification Date      | 2021-06-28T06:44:38 |
| 16 Purity                 | 100.00 %            |
| 17 Spectrum Quality       | 0.000               |
| 18 Spectrometer Frequency | 125.78              |
| 19 Spectral Width         | 30120.5             |
| 20 Lowest Frequency       | -2505.1             |
| 21 Nucleus                | 13C                 |
| 22 Acquired Size          | 32768               |
| 23 Spectral Size          | 65536               |

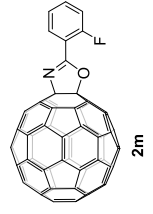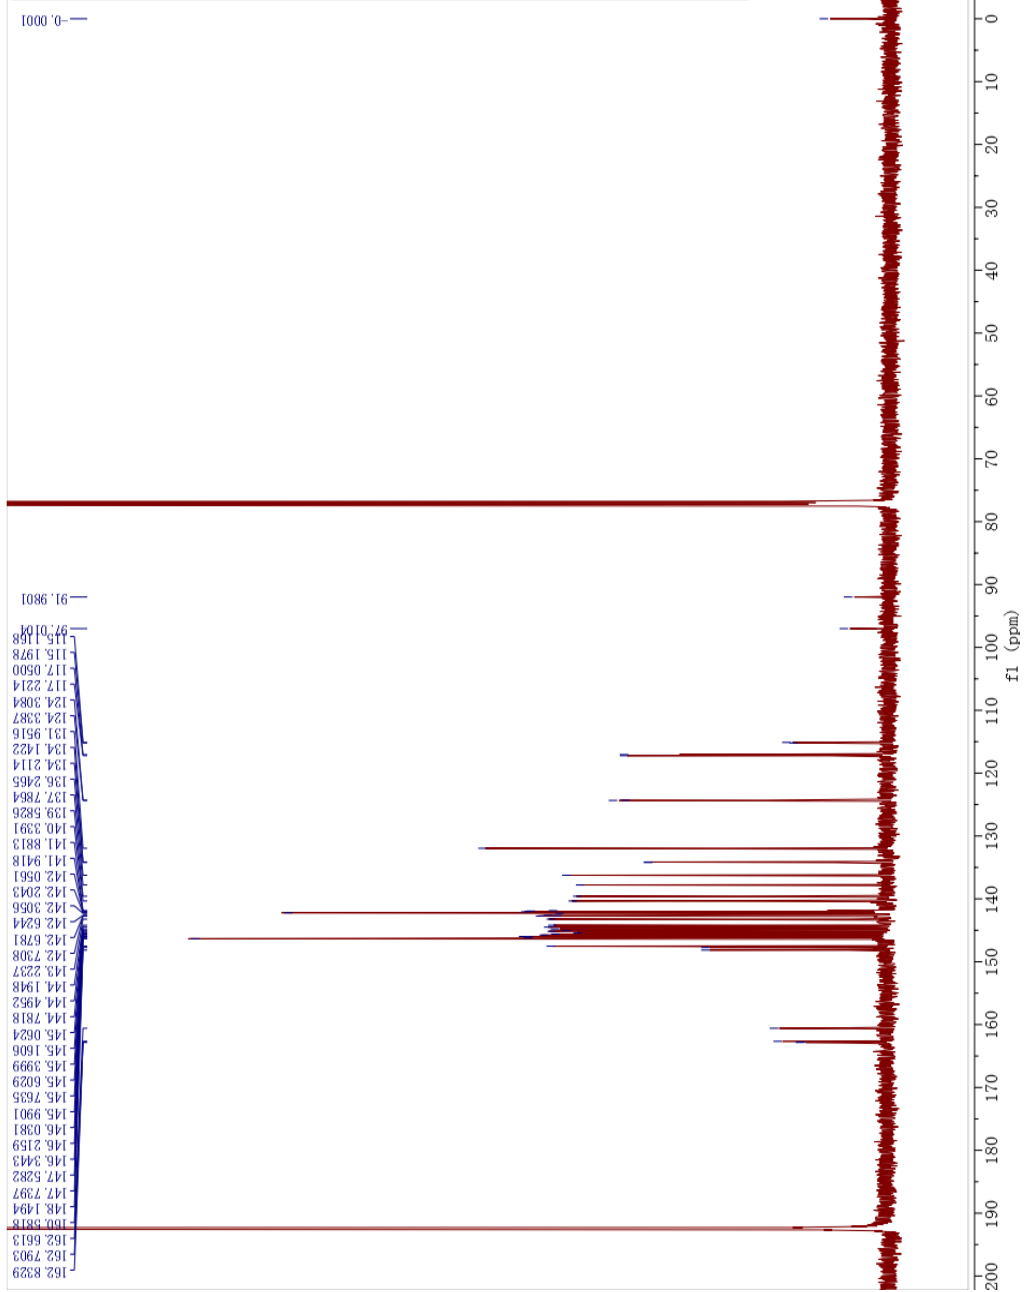

**Figure S28.** <sup>13</sup>C NMR (126 MHz, 1:1 CS<sub>2</sub>/CDCl<sub>3</sub>) of **2m**.

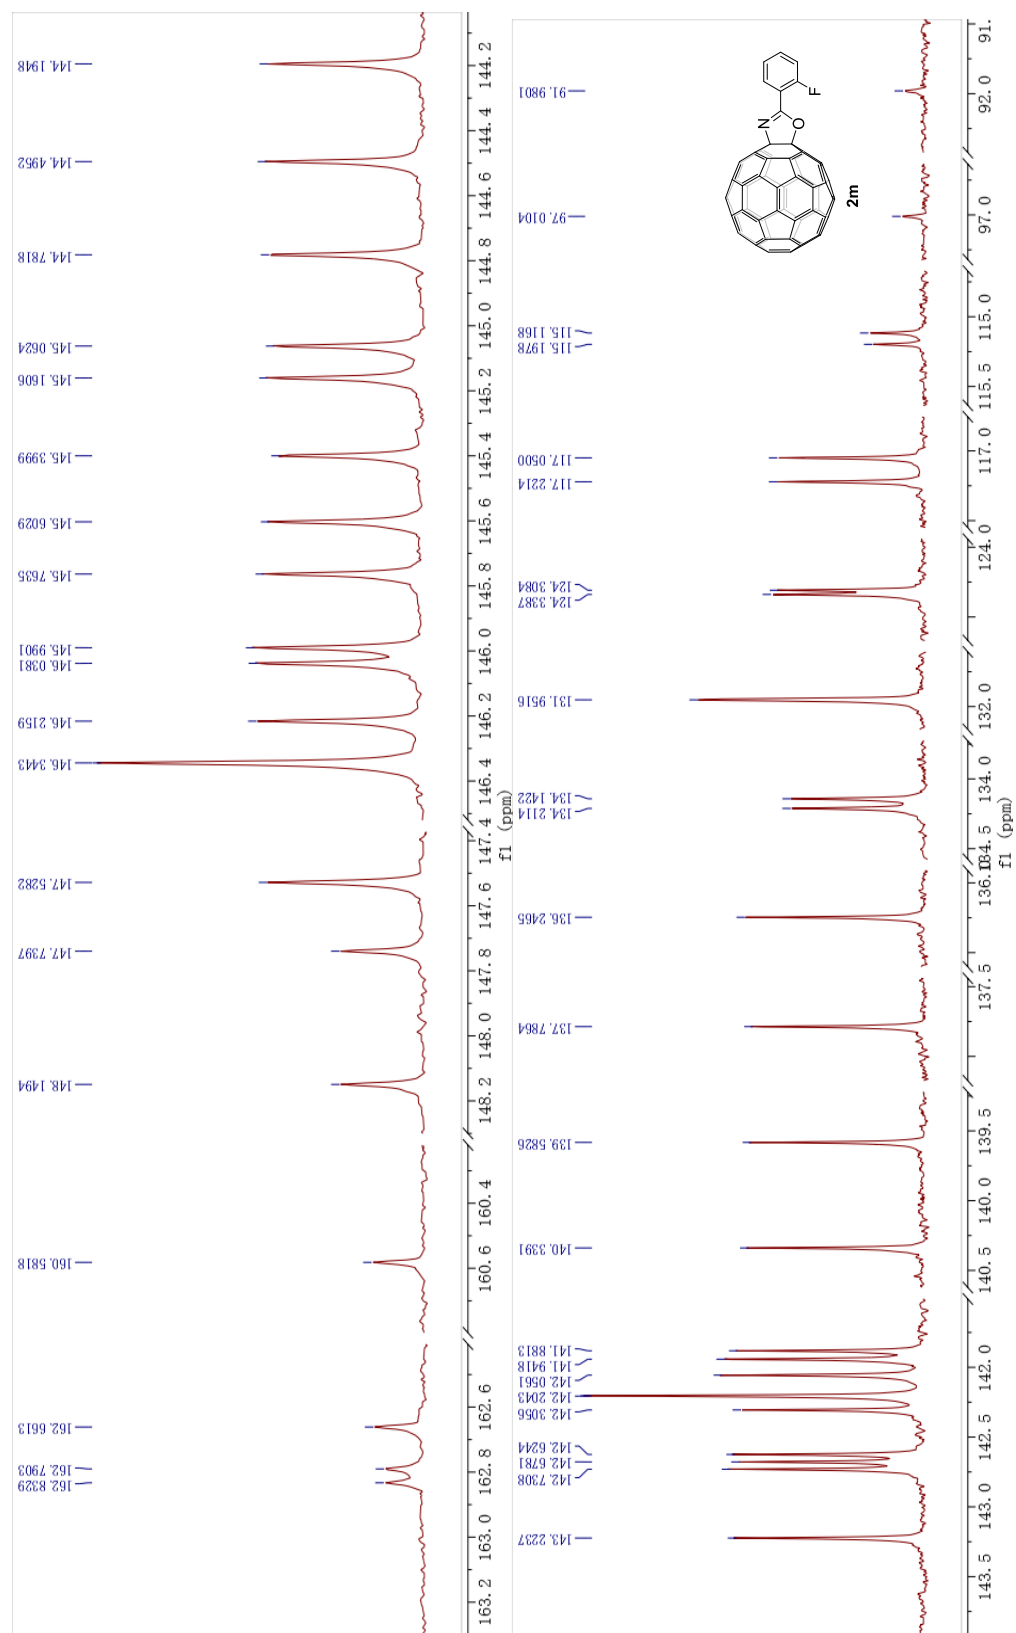

**Figure S29.** Expanded  $^{13}\text{C}$  NMR (126 MHz, 1:1  $\text{CS}_2/\text{CDCl}_3$ ) of **2m**.



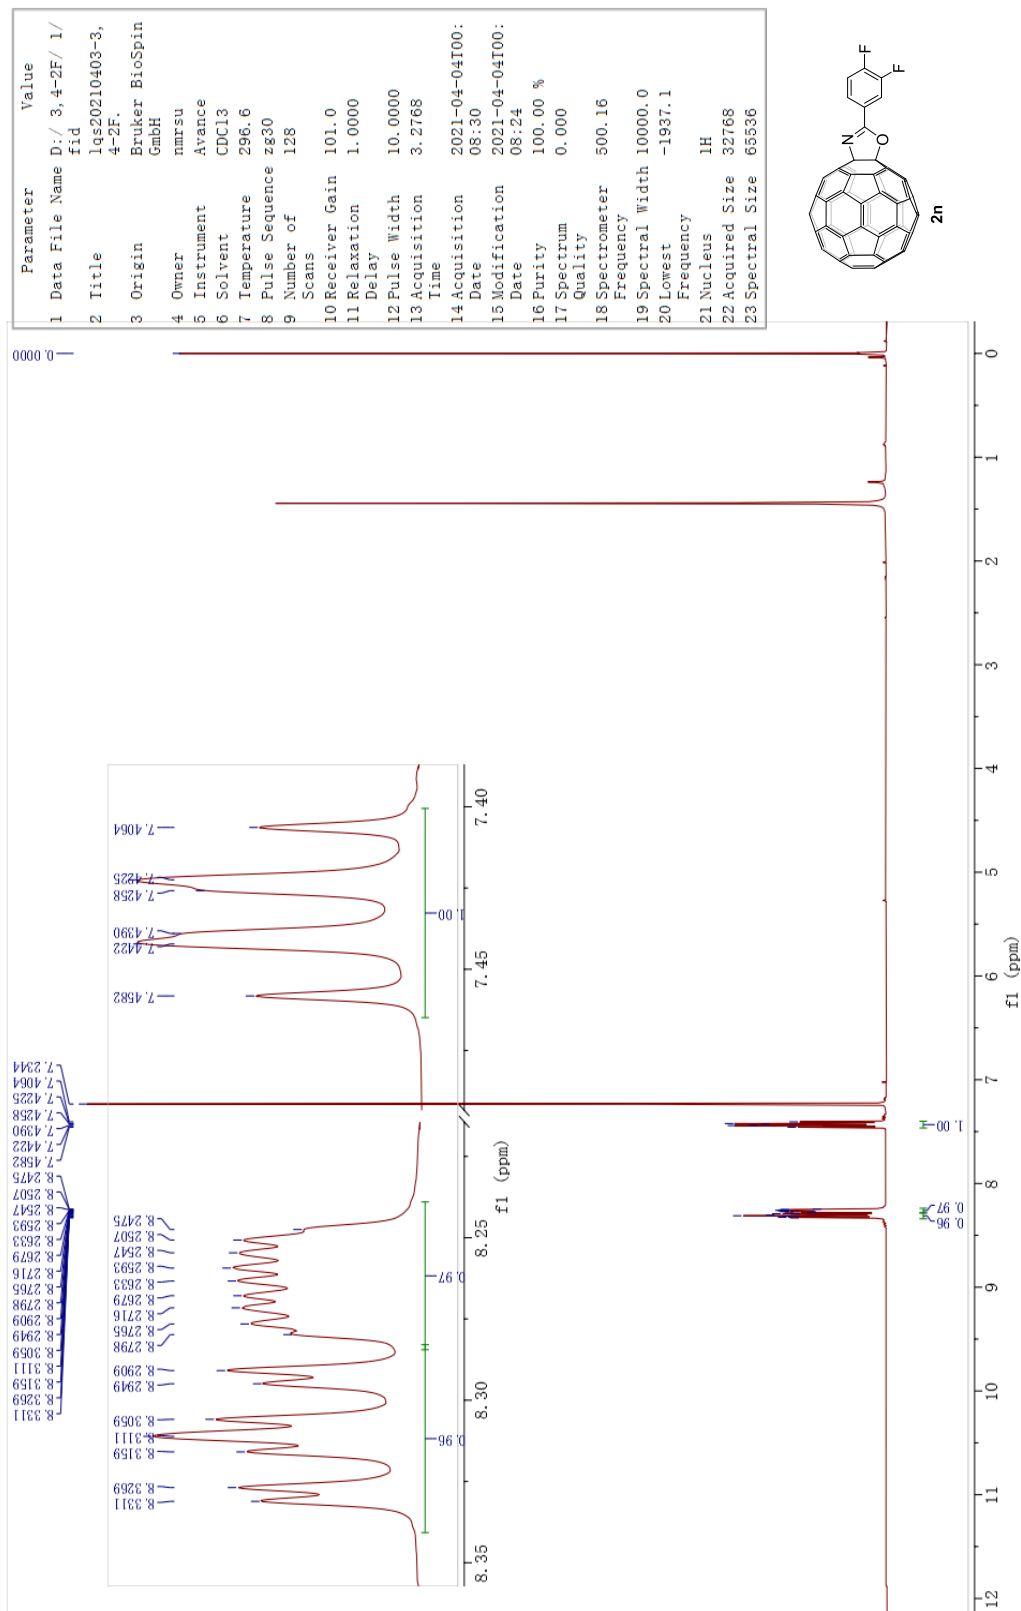

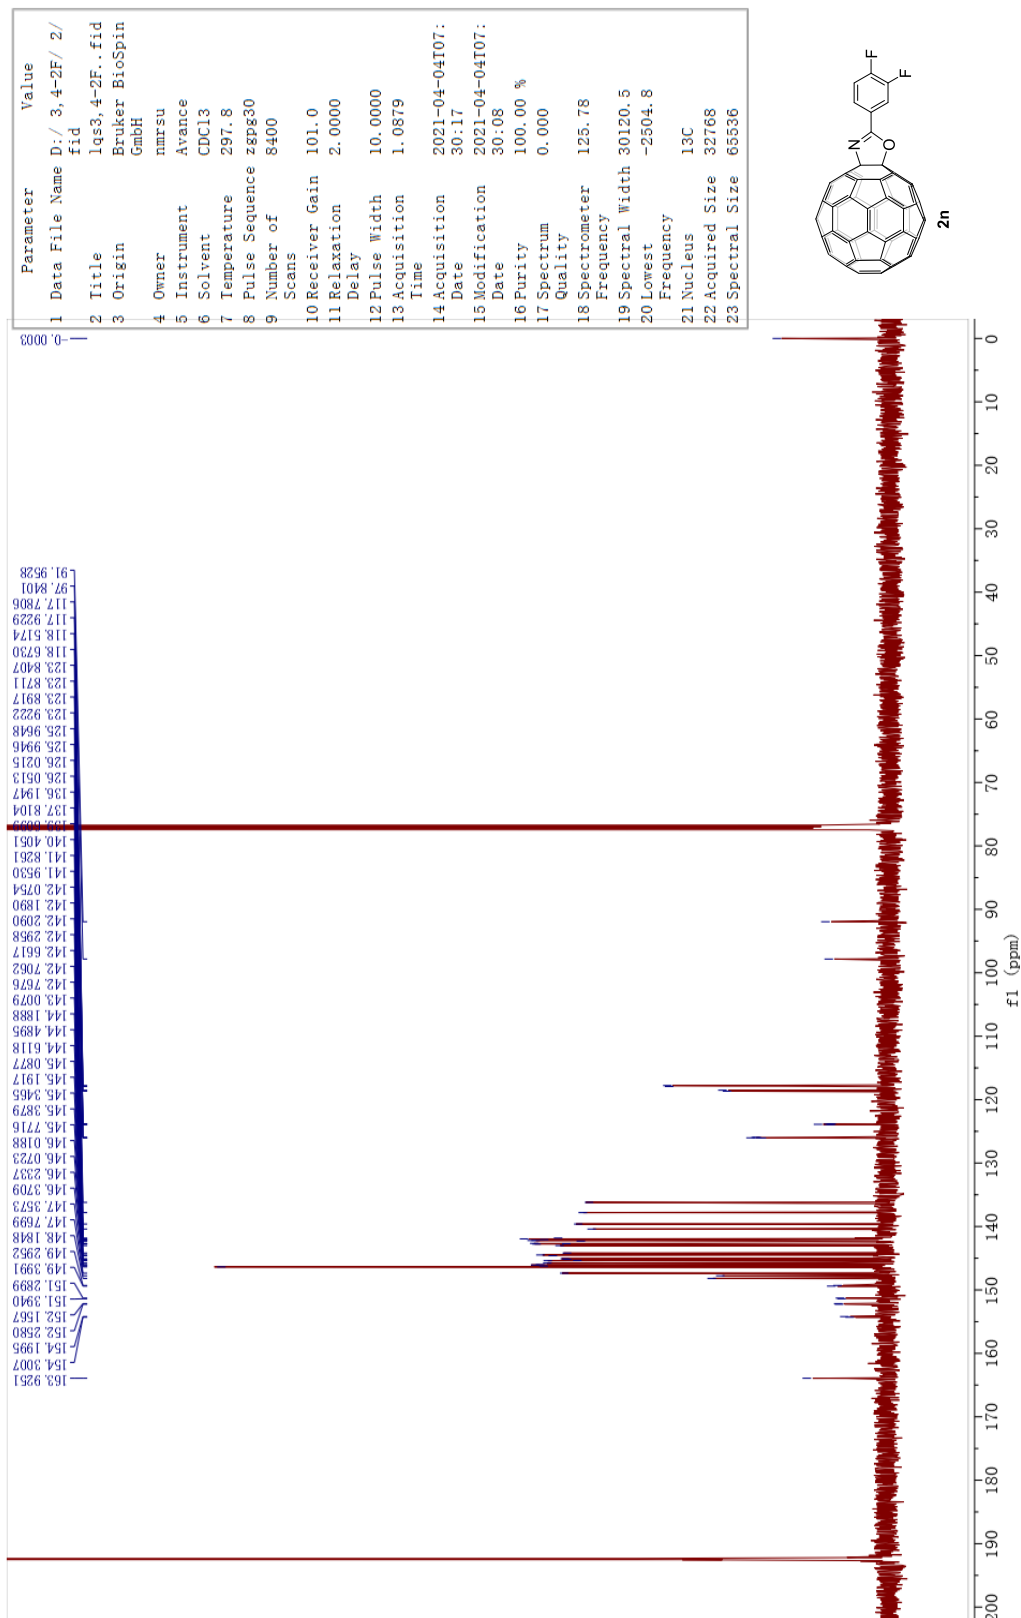

**Figure S31.**  $^{13}\text{C}$  NMR (126 MHz, 1:1  $\text{CS}_2/\text{CDCl}_3$ ) of **2n**.

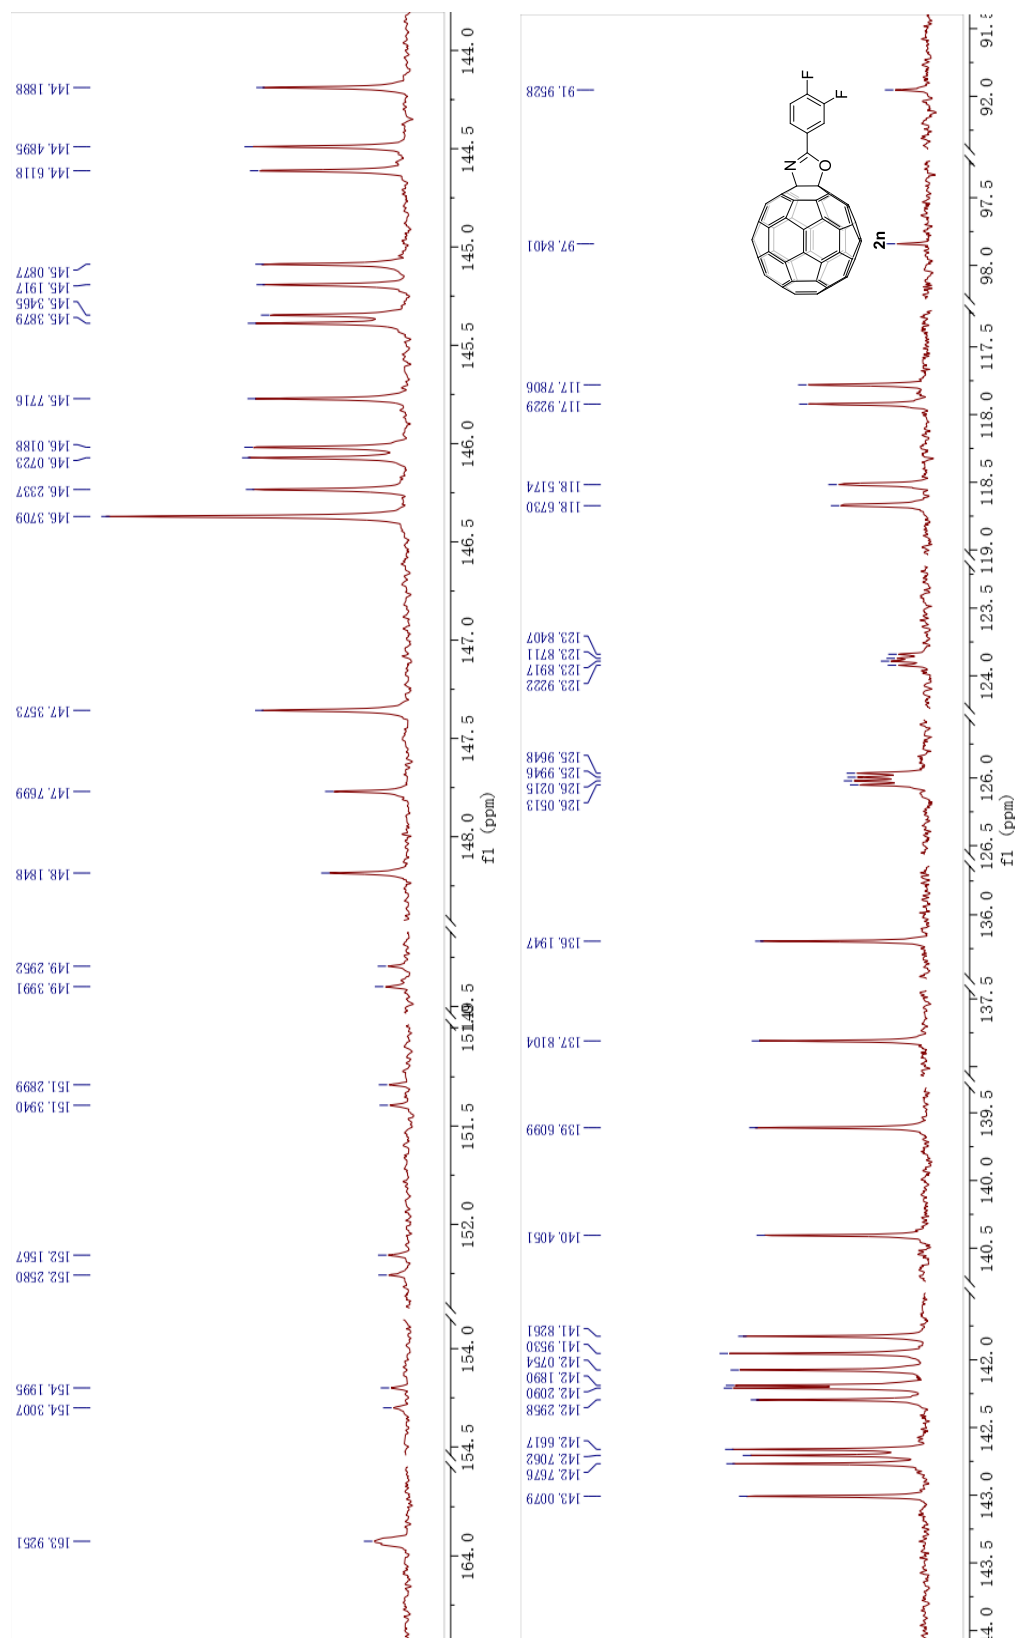

**Figure S32.** Expanded <sup>13</sup>C NMR (126 MHz, 1:1 CS<sub>2</sub>/CDCl<sub>3</sub>) of **2n**.

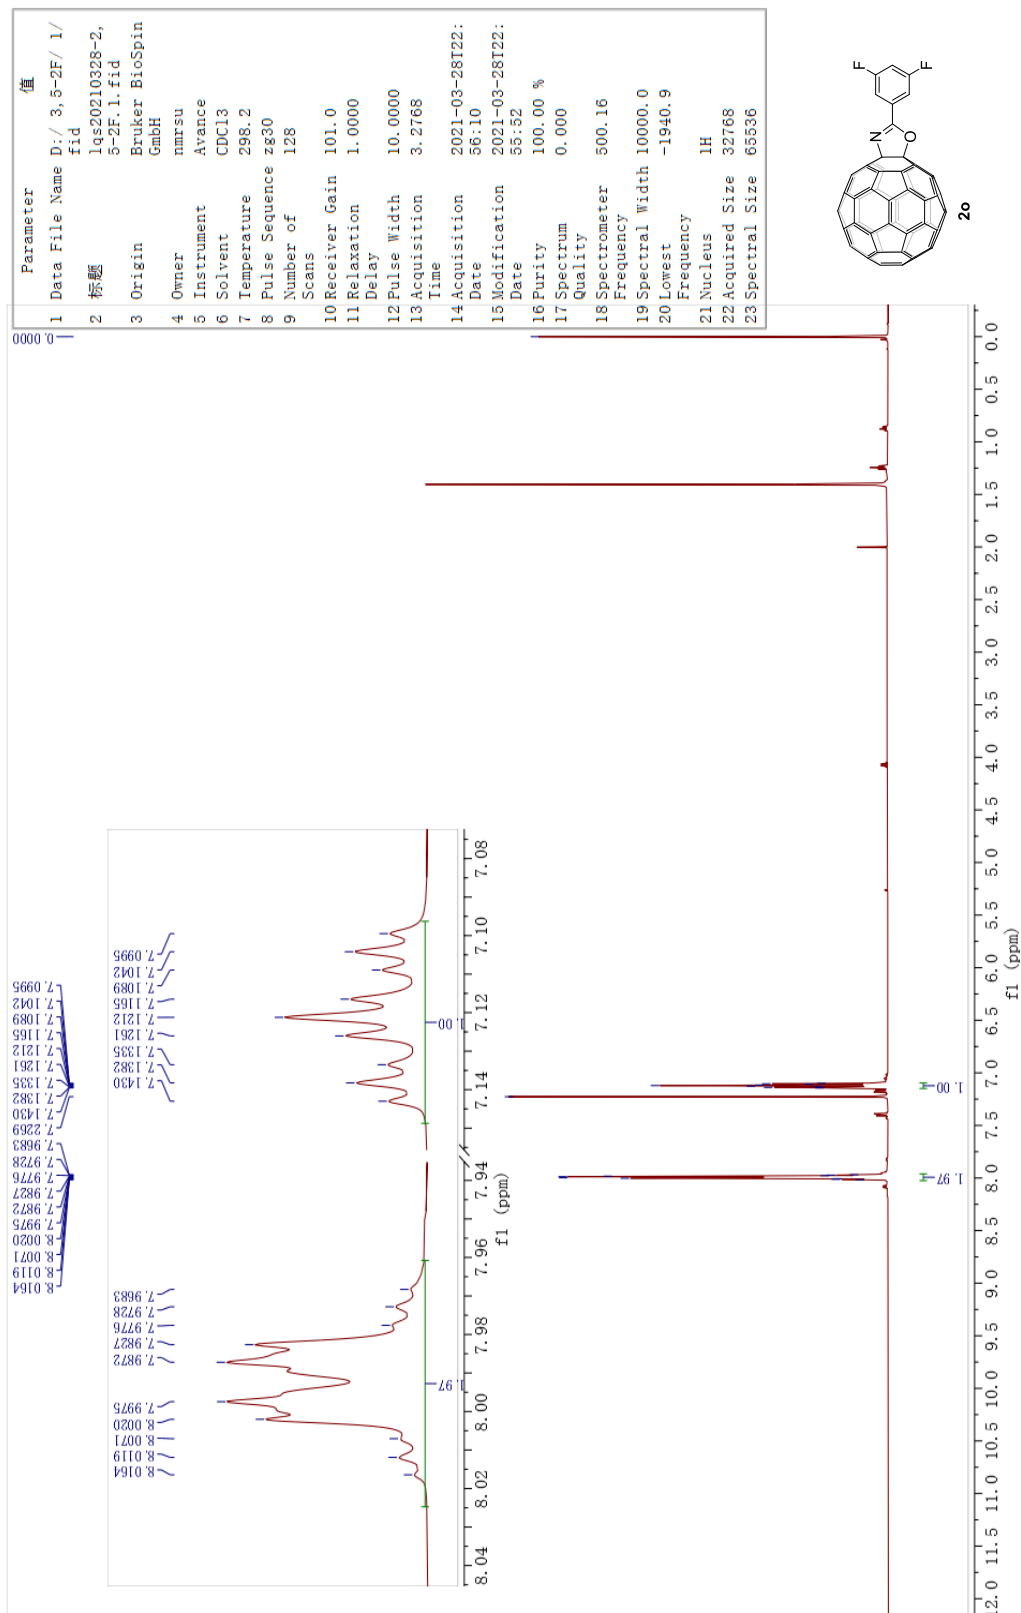

**Figure S33.**  $^1\text{H}$  NMR (500 MHz, 1:1  $\text{CS}_2/\text{CDCl}_3$ ) of **20**.

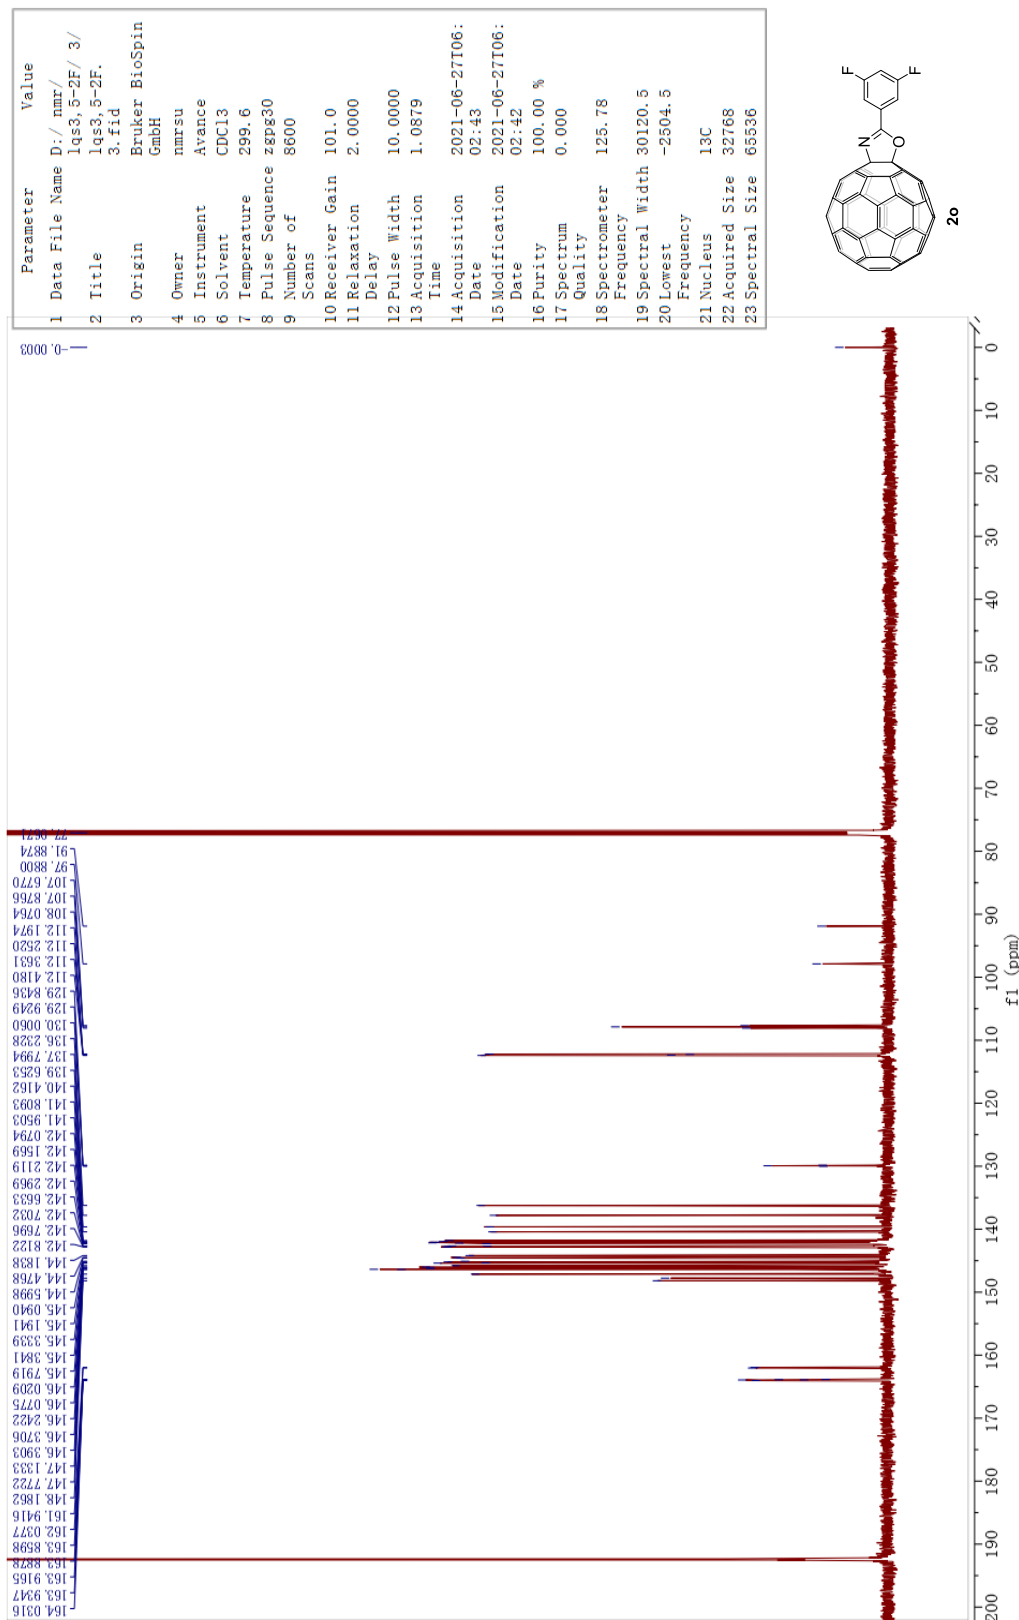

**Figure S34.**  $^{13}\text{C}$  NMR (126 MHz, 1:1  $\text{CS}_2/\text{CDCl}_3$ ) of **2o**.

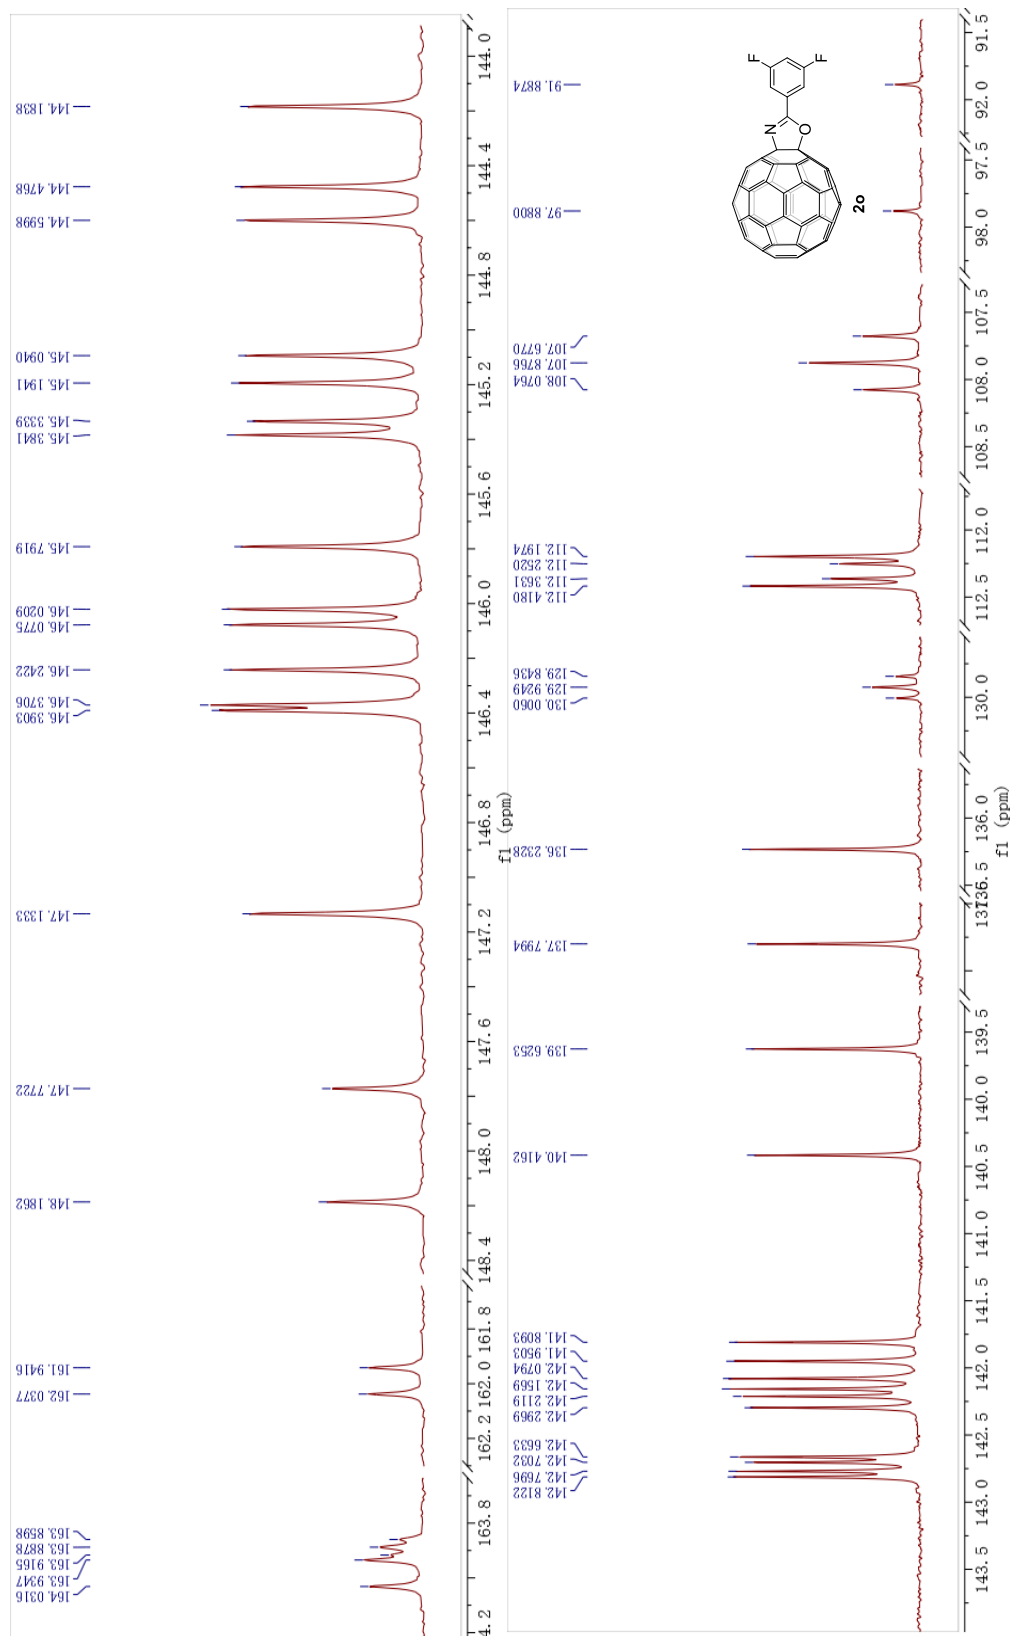

**Figure S35.** Expanded  $^{13}\text{C}$  NMR (126 MHz, 1:1  $\text{CS}_2/\text{CDCl}_3$ ) of **2o**.

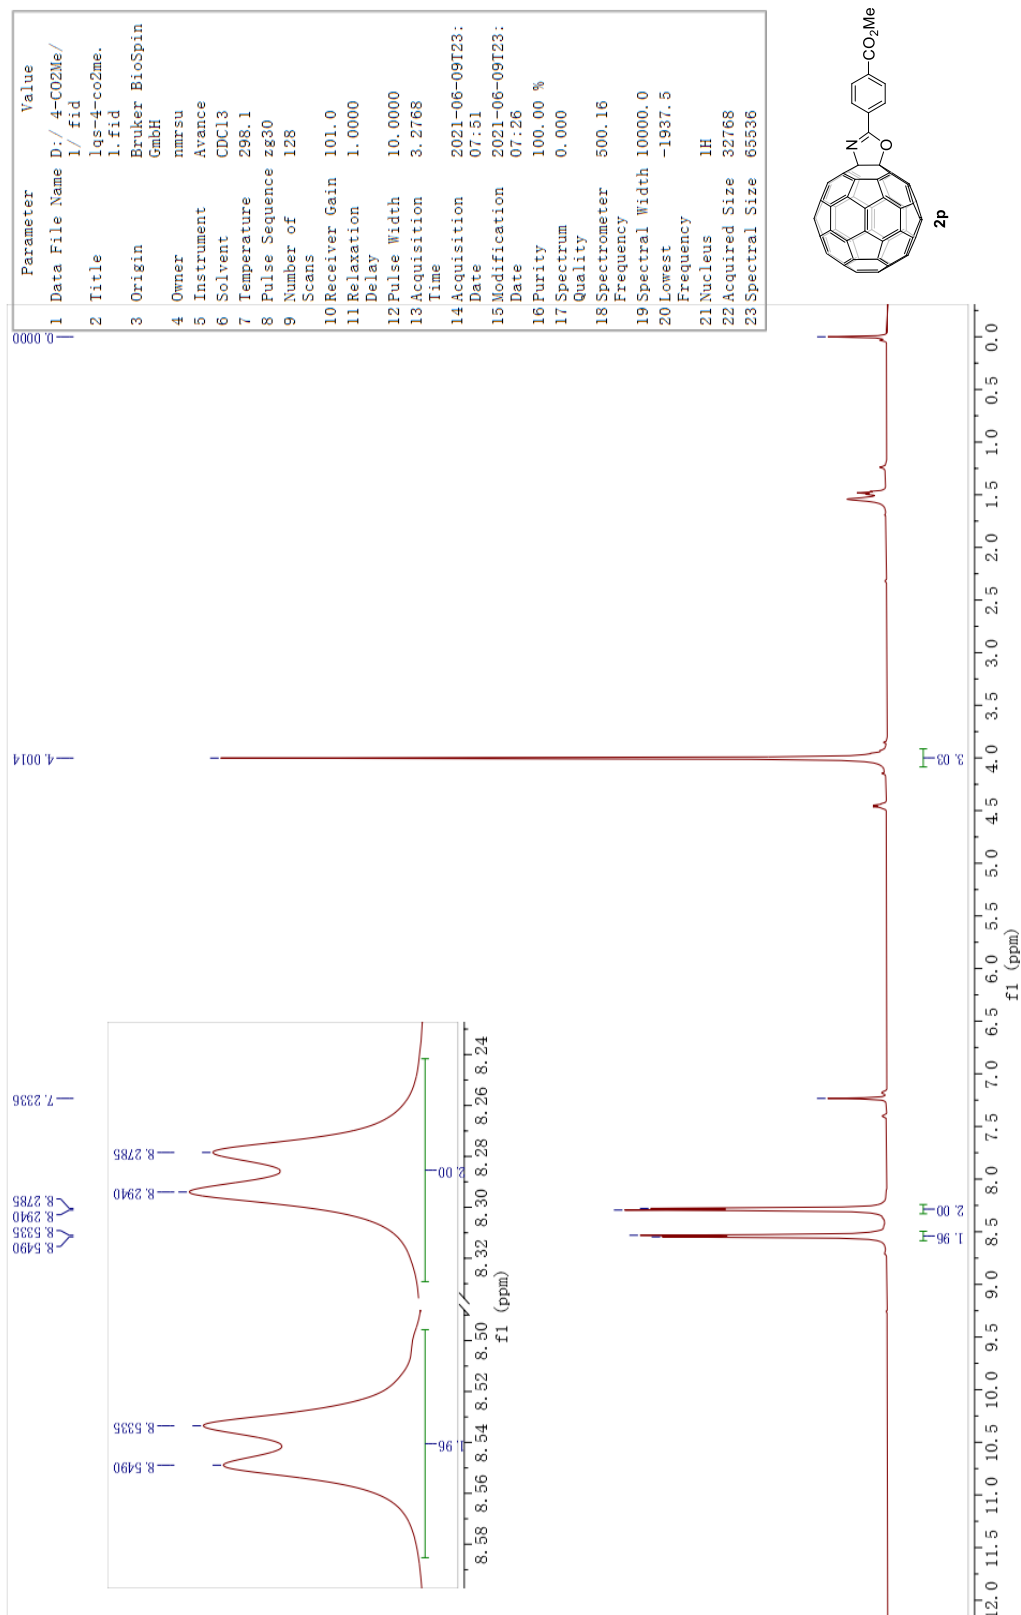

**Figure S36.**  $^1\text{H}$  NMR (500 MHz, 1:1  $\text{CS}_2/\text{CDCl}_3$ ) of **2p**.

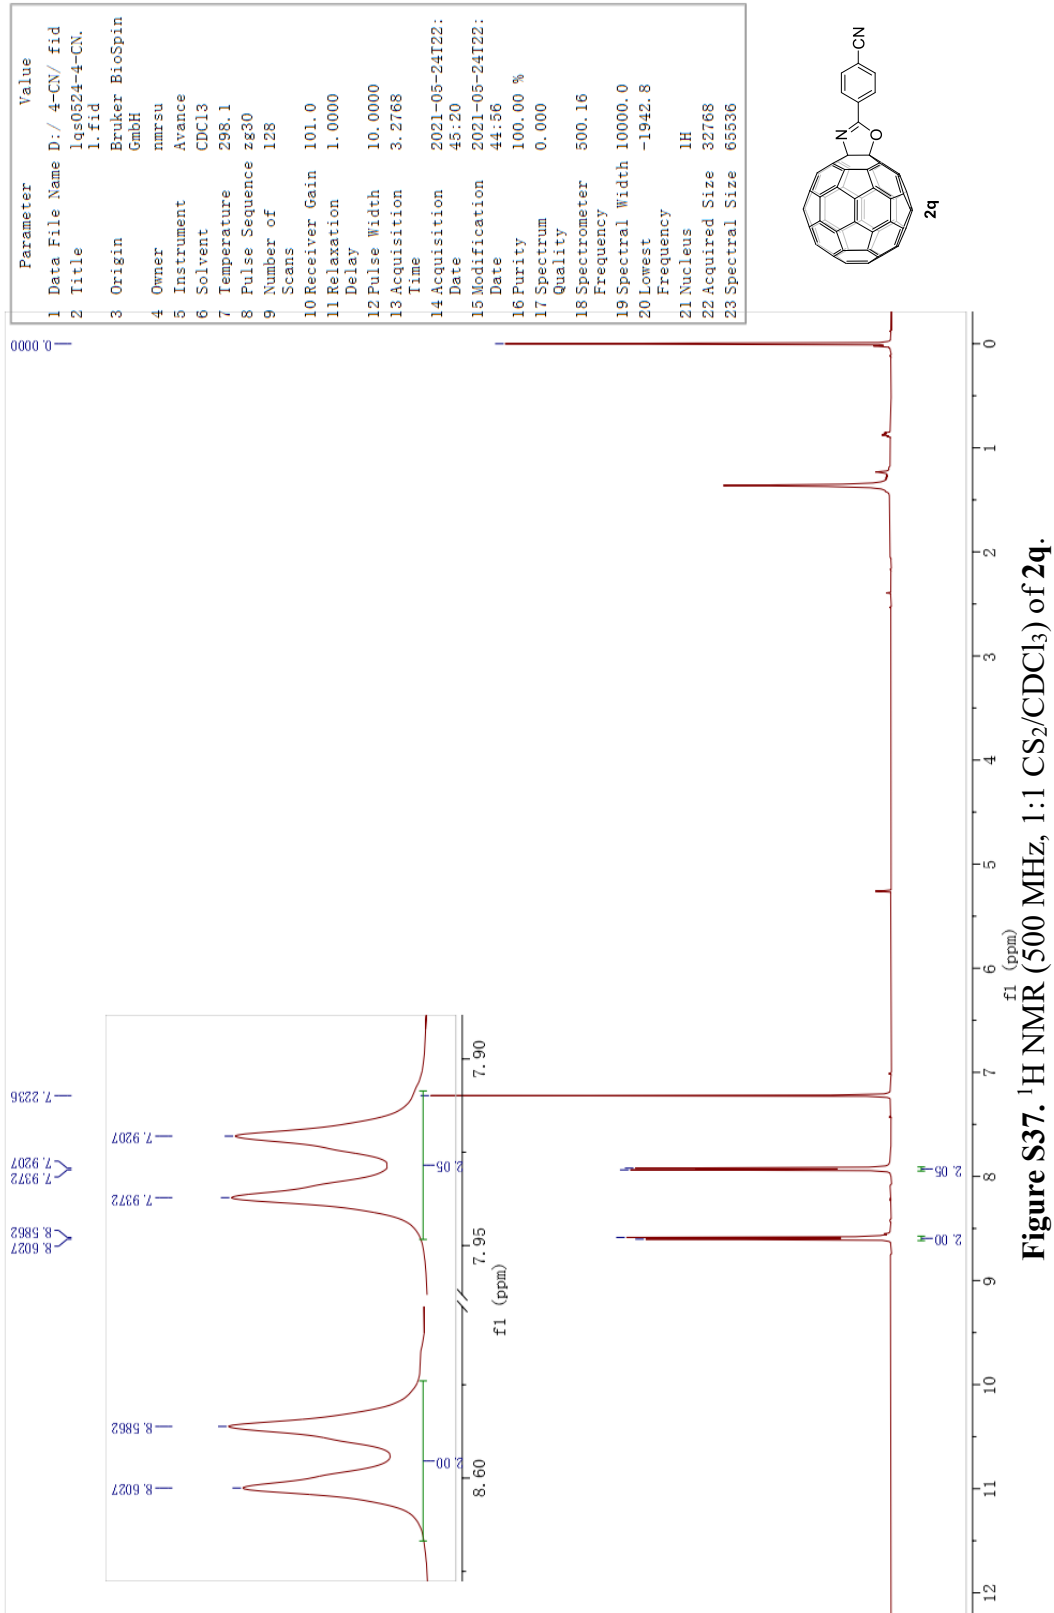

**Figure S37.**  $^1\text{H}$  NMR (500 MHz, 1:1  $\text{CS}_2/\text{CDCl}_3$ ) of **2q**.



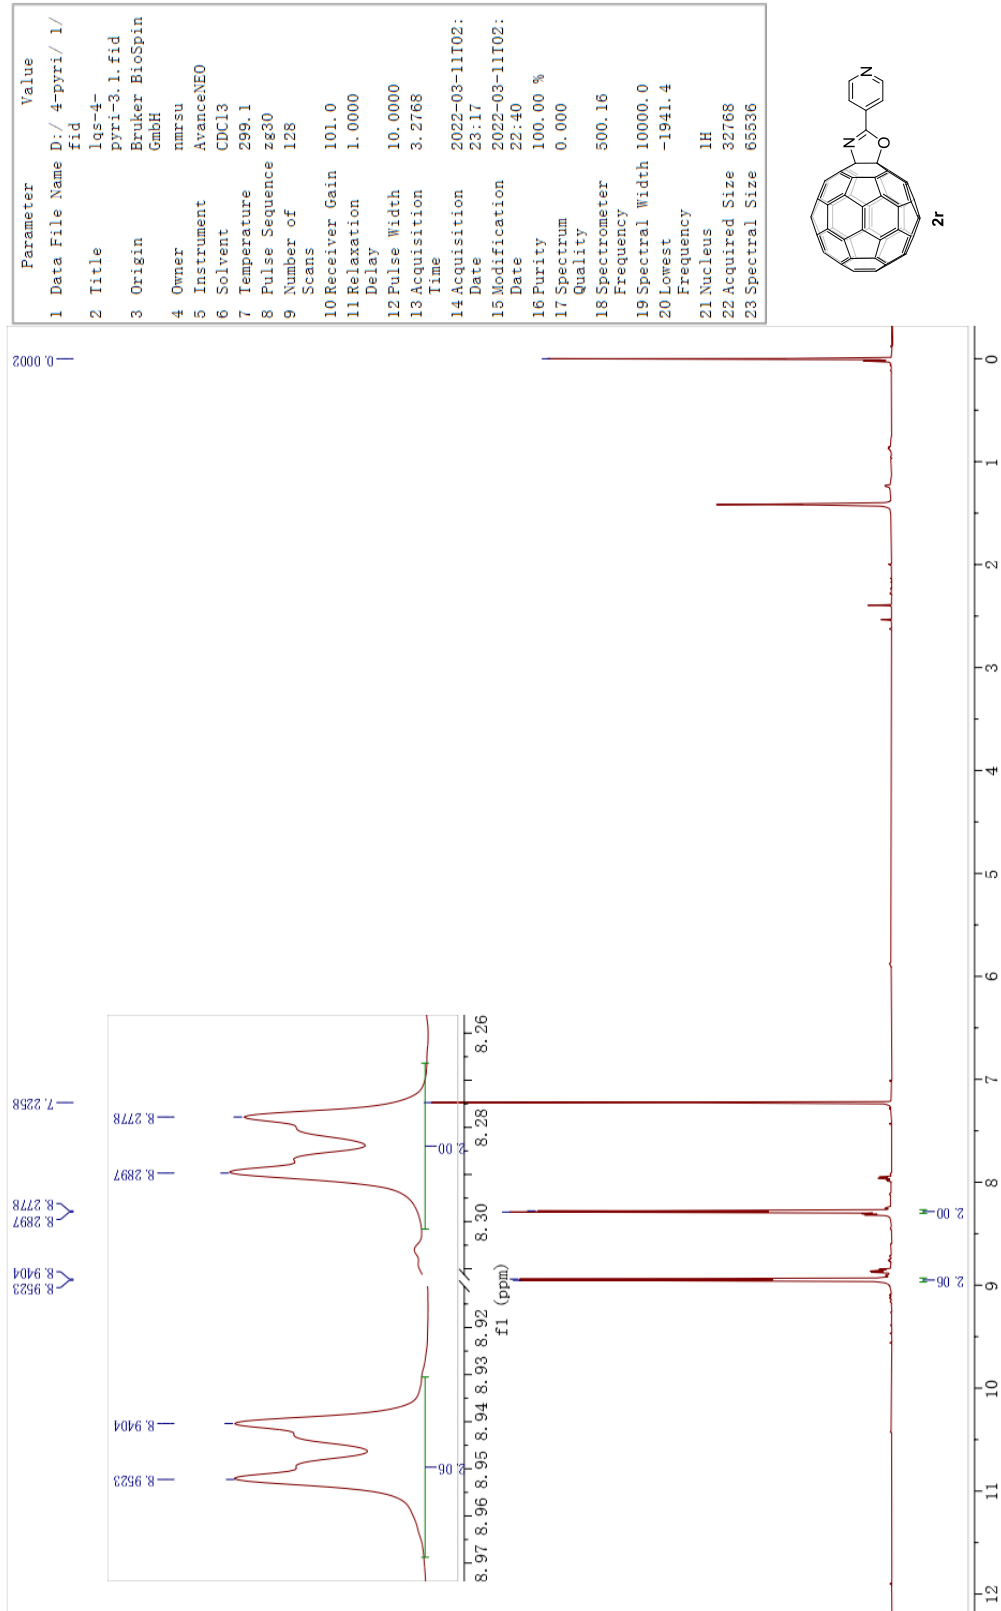

**Figure S38.**  $^1\text{H}$  NMR (500 MHz, 1:1  $\text{CS}_2/\text{CDCl}_3$ ) of **2r**.

| Parameter                 | Value                                  |
|---------------------------|----------------------------------------|
| 1 Data File Name          | D:/1-2.jdf                             |
| 2 Title                   | lqs20220314-C                          |
| 3 Comment                 | single pulse<br>decoupled<br>gated NOE |
| 4 Origin                  | JEOL                                   |
| 5 Instrument              | ECA                                    |
| 6 Solvent                 | CHLOROFORM-D                           |
| 7 Temperature             | 23.9                                   |
| 8 Pulse Sequence          | carbon.jxp                             |
| 9 Experiment              | 1D                                     |
| 10 Probe                  | 3450                                   |
| 11 Number of Scans        | 10000                                  |
| 12 Receiver Gain          | 50.0                                   |
| 13 Relaxation Delay       | 2.0000                                 |
| 14 Pulse Width            | 3.6000                                 |
| 15 Acquisition Time       | 0.6921                                 |
| 16 Acquisition Date       | 2022-03-14T14:59:34                    |
| 17 Modification Date      | 2022-03-15T09:42:00                    |
| 18 Class                  |                                        |
| 19 Spectrometer Frequency | 150.91                                 |
| 20 Spectral Width         | 37876.8                                |
| 21 Lowest Frequency       | -3890.6                                |
| 22 Nucleus                | <sup>13</sup> C                        |
| 23 Acquired Size          | 32768                                  |
| 24 Spectral Size          | 26214                                  |
| 25 Digital Resolution     | 1.44                                   |

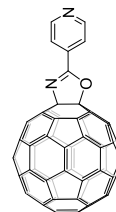

2r

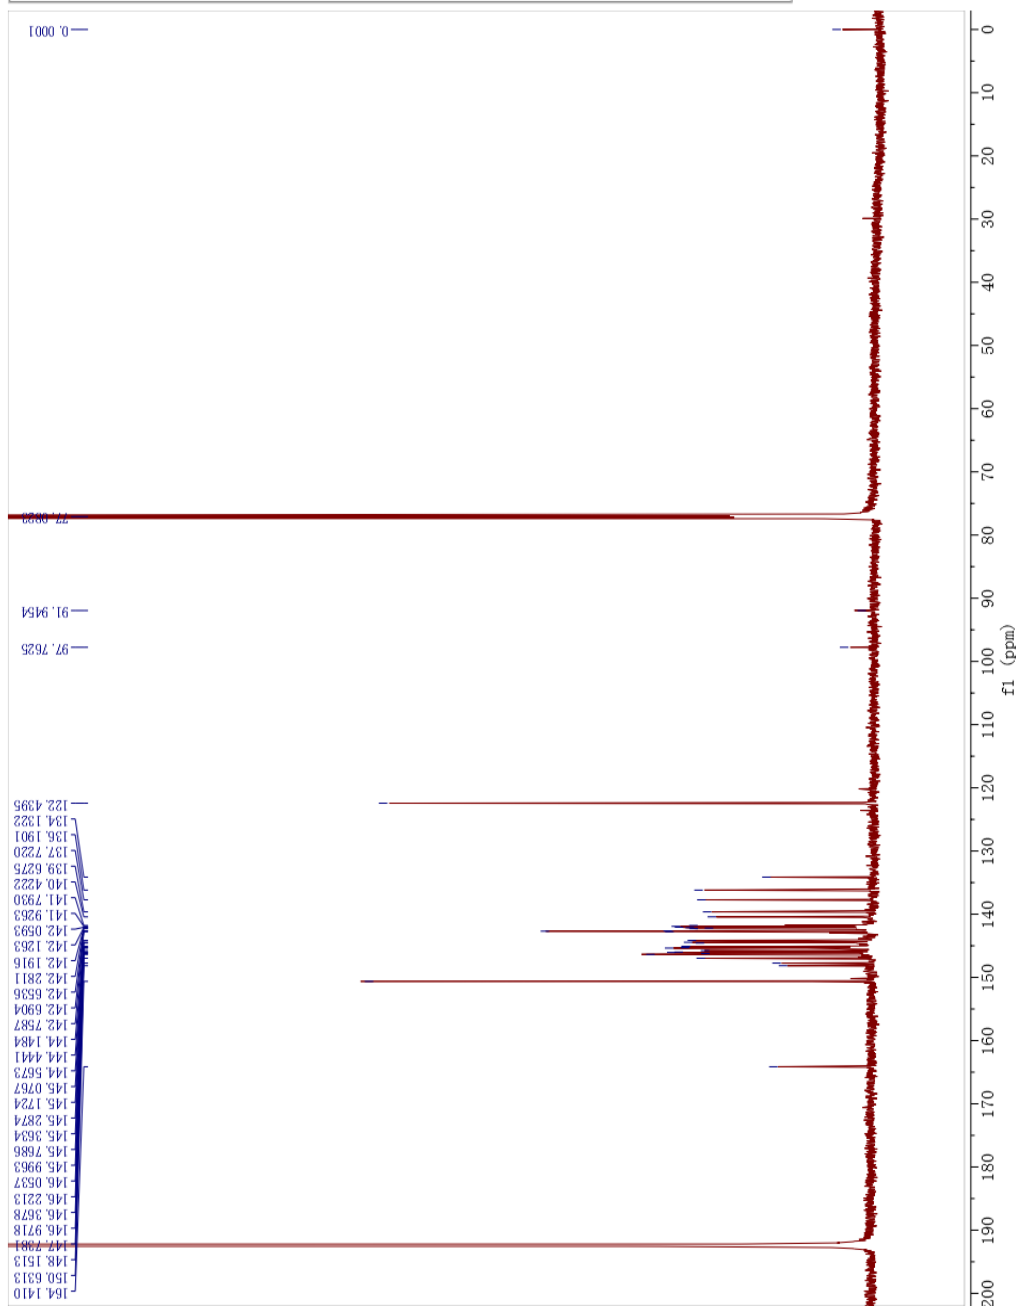

Figure S39. <sup>13</sup>C NMR (151 MHz, 1:1 CS<sub>2</sub>/CDCl<sub>3</sub>) of 2r.

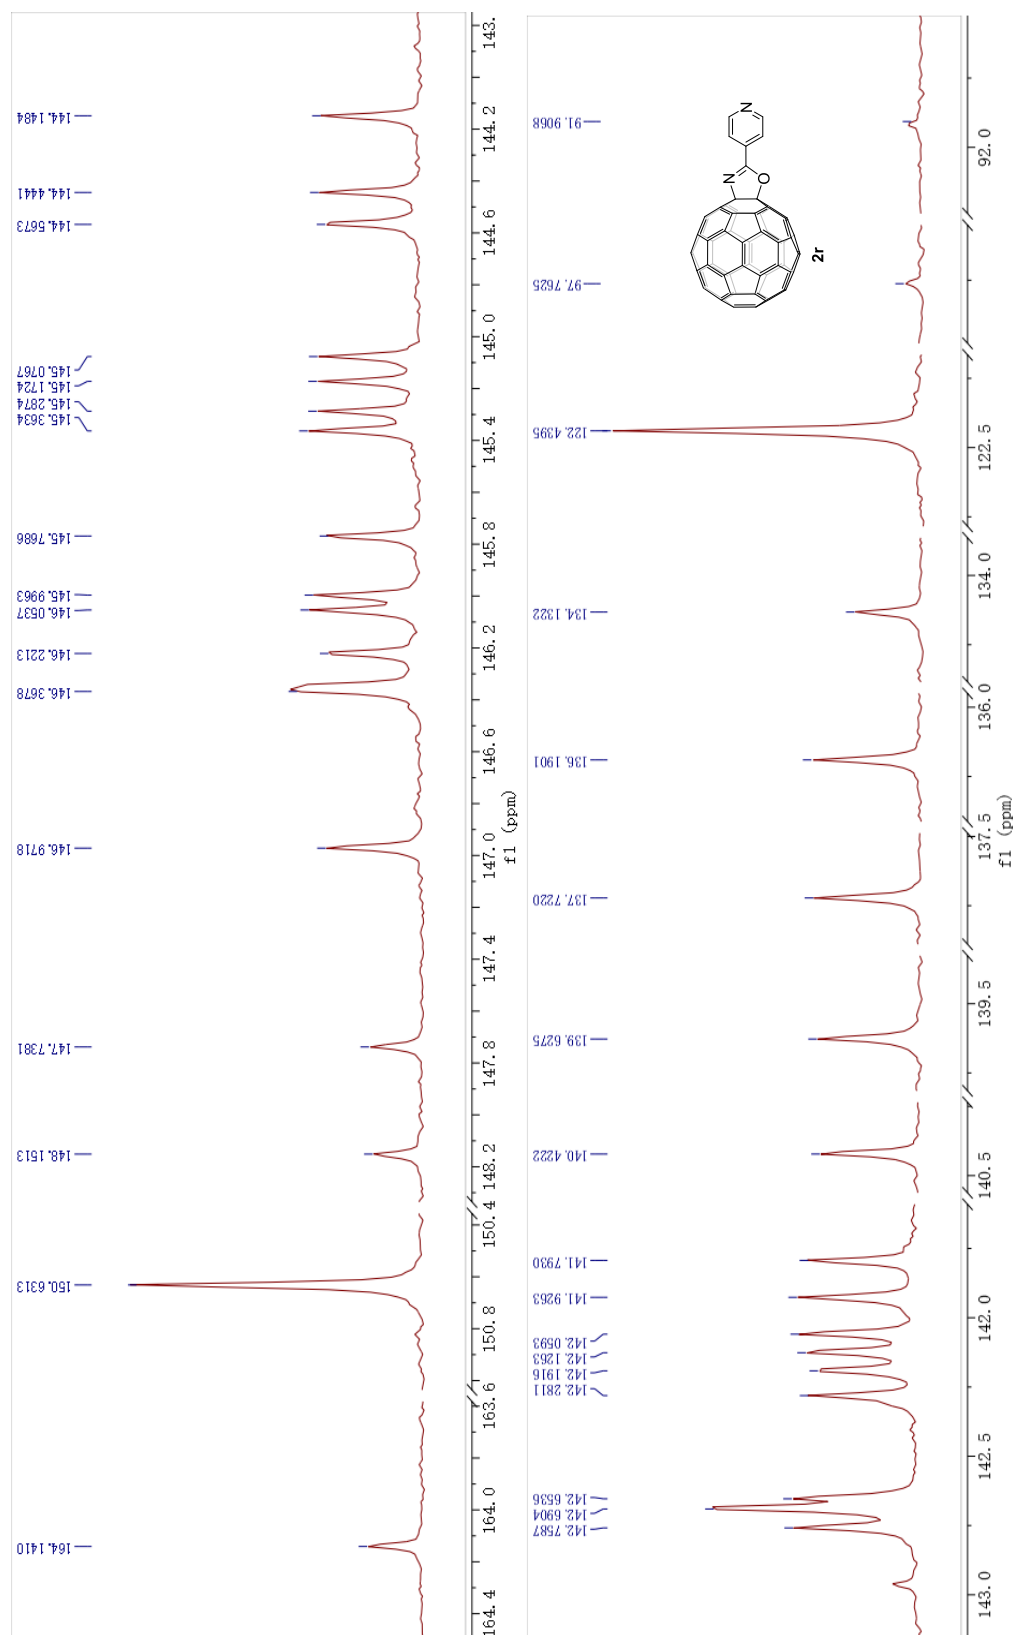

**Figure S40.** Expanded <sup>13</sup>C NMR (151 MHz, 1:1 CS<sub>2</sub>/CDCl<sub>3</sub>) of **2r**.

| Parameter                 | Value               |
|---------------------------|---------------------|
| 1 Data File Name          | D:/IFA-H/ fid       |
| 2 Title                   | lqs-1119-1.10.fid   |
| 3 Origin                  | Bruker BioSpin GmbH |
| 4 Owner                   | nmtsu               |
| 5 Instrument              | spect               |
| 6 Solvent                 | CDCl2               |
| 7 Temperature             | 0.0                 |
| 8 Pulse Sequence          | zg30                |
| 9 Number of Scans         | 128                 |
| 10 Receiver Gain          | 168.1               |
| 11 Relaxation Delay       | 1.0000              |
| 12 Pulse Width            | 10.0000             |
| 13 Acquisition Time       | 4.0894              |
| 14 Acquisition Date       | 2020-11-19T22:10:00 |
| 15 Modification Date      | 2020-11-19T22:10:40 |
| 16 Purity                 | 100.00 %            |
| 17 Spectrum Quality       | 0.000               |
| 18 Spectrometer Frequency | 400.13              |
| 19 Spectral Width         | 8012.8              |
| 20 Lowest Frequency       | -1321.4             |
| 21 Nucleus                | <sup>1</sup> H      |
| 22 Acquired Size          | 32768               |
| 23 Spectral Size          | 65536               |

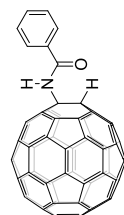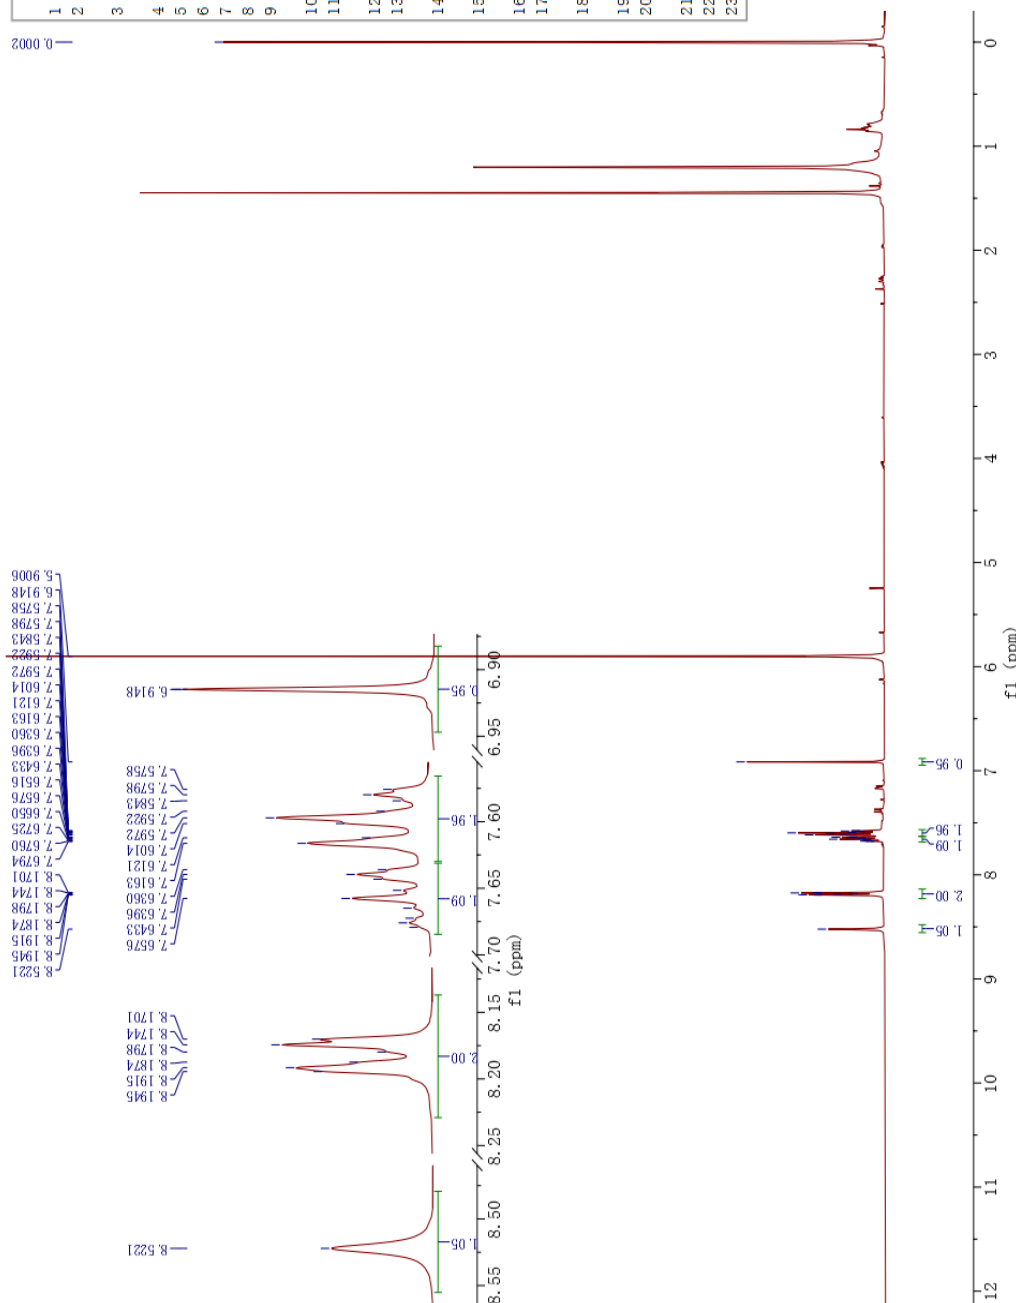

Figure S41. <sup>1</sup>H NMR (400 MHz, CDCl<sub>2</sub>) of 3a.

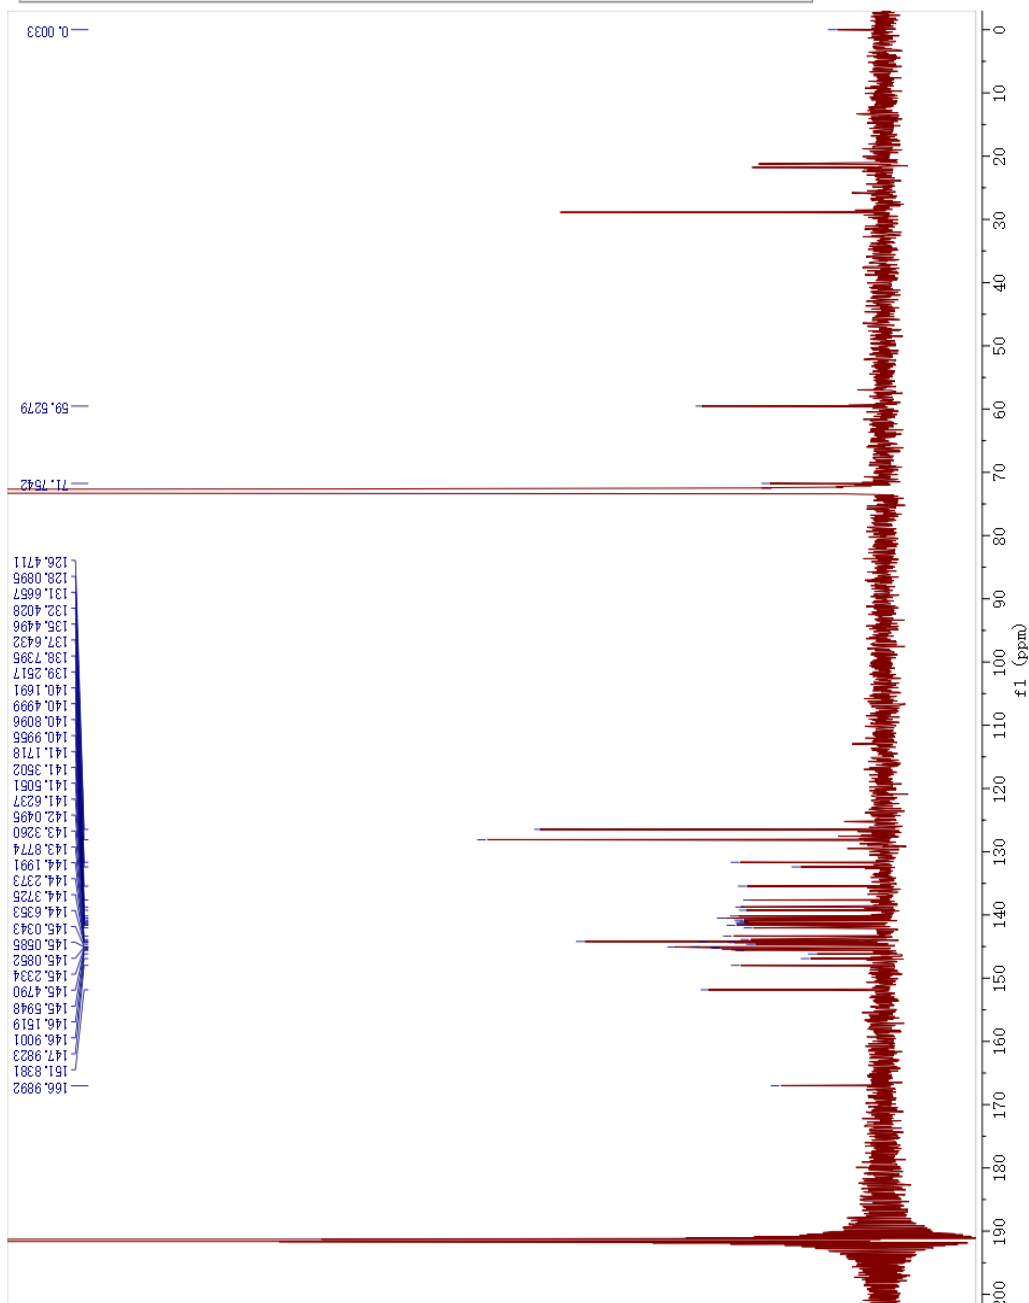

| Parameter             | Value                                  |
|-----------------------|----------------------------------------|
| 1 Data File Name      | D:/ 1031-TFA-C.jdf                     |
| 2 Title               | lqs1031                                |
| 3 Comment             | single pulse<br>decoupled<br>gated NOE |
| 4 Instrument          | ECA                                    |
| 5 Solvent             | TETRACHLOROETHAN                       |
| 6 Temperature         | 19.2                                   |
| 7 Pulse Sequence      | carbon.jxp                             |
| 8 Experiment ID       |                                        |
| 9 Probe               | 3450                                   |
| 10 Number of Scans    | 10000                                  |
| 11 Receiver Gain      | 50.0                                   |
| 12 Relaxation Delay   | 2.0000                                 |
| 13 Pulse Width        | 3.6000                                 |
| 14 Acquisition time   | 0.6921                                 |
| 15 Acquisition Date   | 2021-10-31T01:21:31                    |
| 16 Modification Date  | 2021-11-01T09:04:36                    |
| 17 Class              |                                        |
| 18 Spectrometer       | 150.91                                 |
| 19 Frequency          | 37876.8                                |
| 20 Lowest Frequency   | -4037.7                                |
| 21 Nucleus            | 13C                                    |
| 22 Acquired Size      | 32768                                  |
| 23 Spectral Size      | 32768                                  |
| 24 Digital Resolution | 1.16                                   |

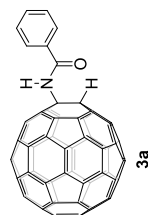

**Figure S42.**  $^{13}\text{C}$  NMR (151 MHz, 2:1  $\text{CDCl}_2/\text{CS}_2$ ) of **3a**.

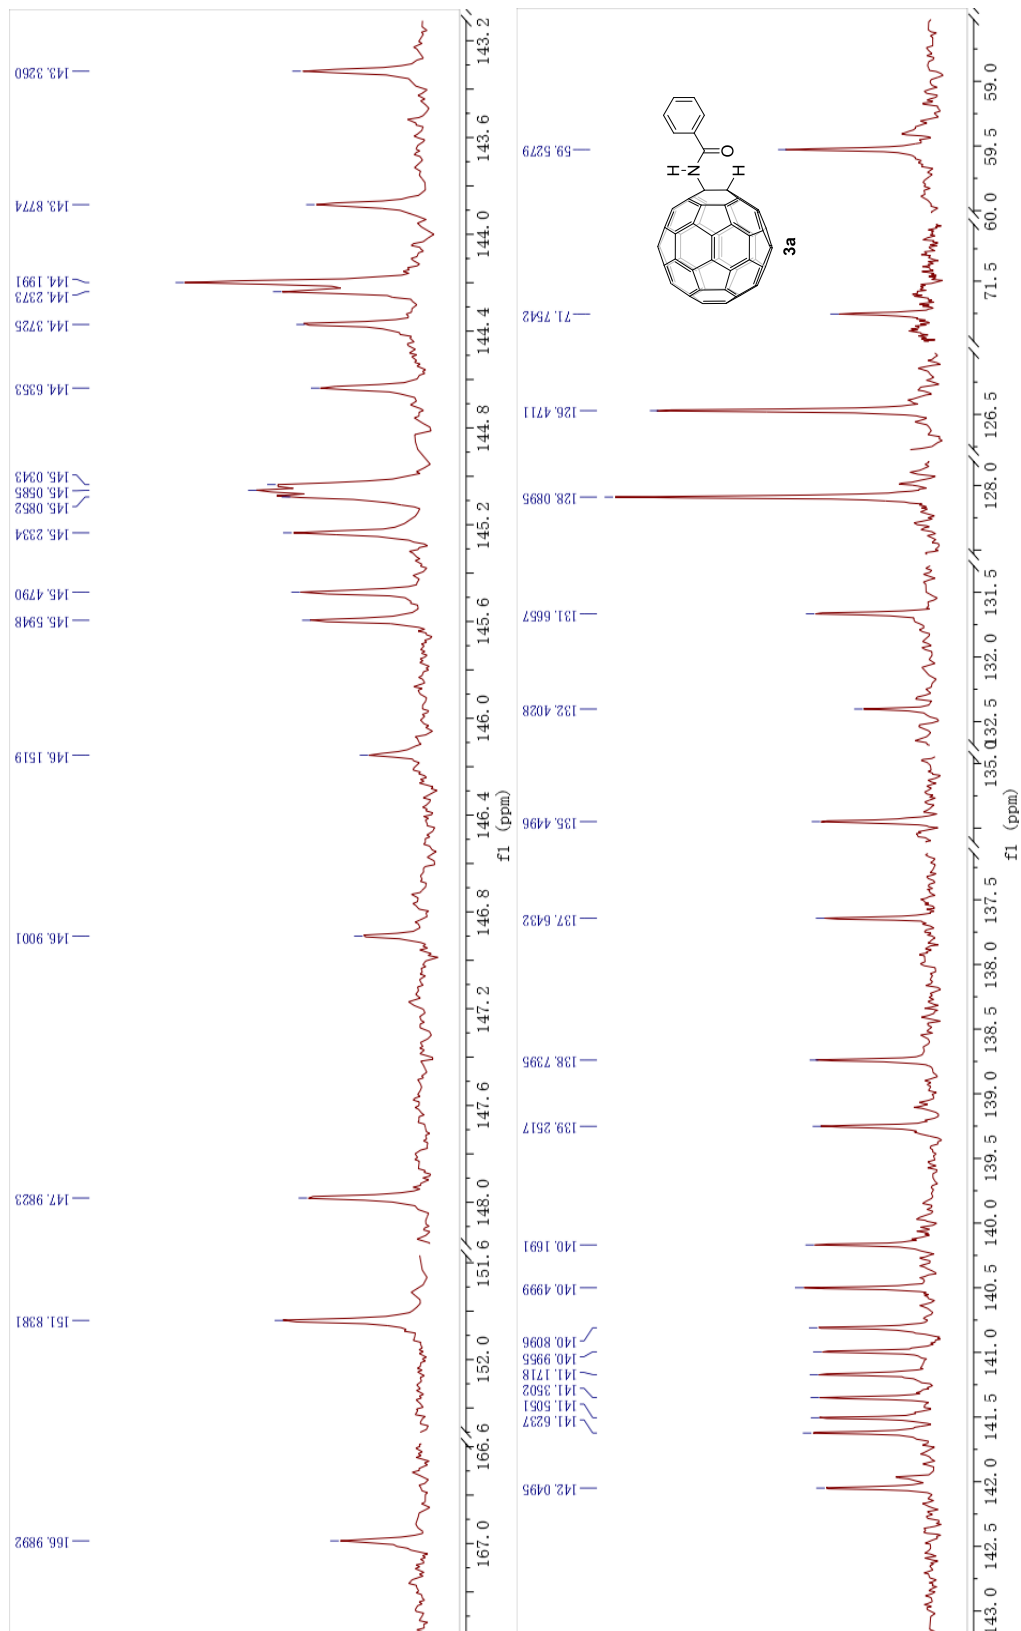

**Figure S43.** Expanded  $^{13}\text{C}$  NMR (151 MHz, 2:1  $\text{CDCl}_2/\text{CS}_2$ ) of **3a**.



## 9. UV-vis Spectra of Compounds 2d-f, 2k-o, 2r and 3a

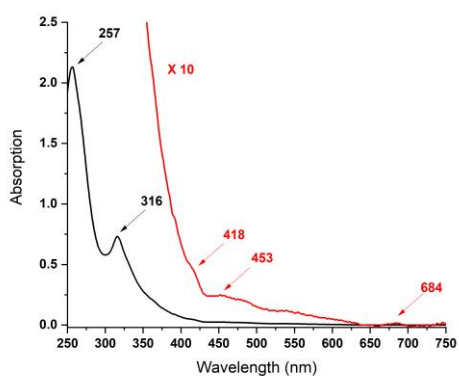

Figure S45. UV-vis absorption of compound 2d.

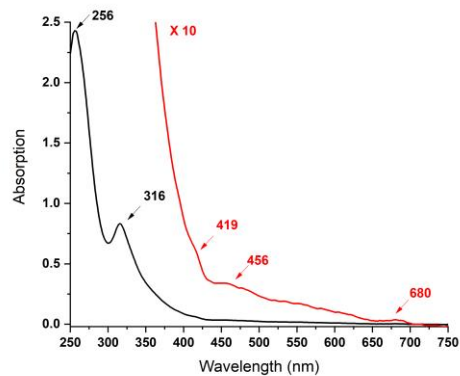

Figure S46. UV-vis absorption of compound 2e.

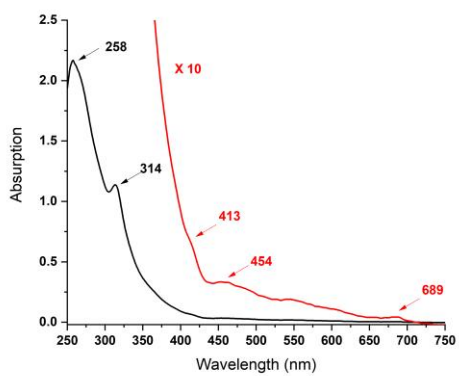

Figure S47. UV-vis absorption of compound 2f.

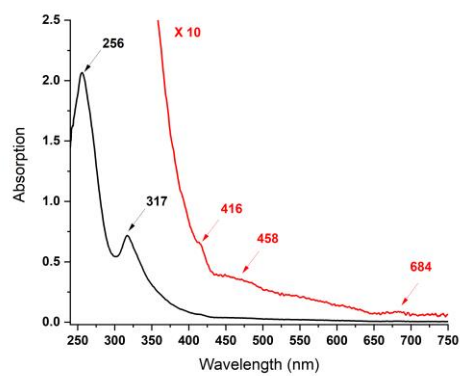

Figure S48. UV-vis absorption of compound 2k.

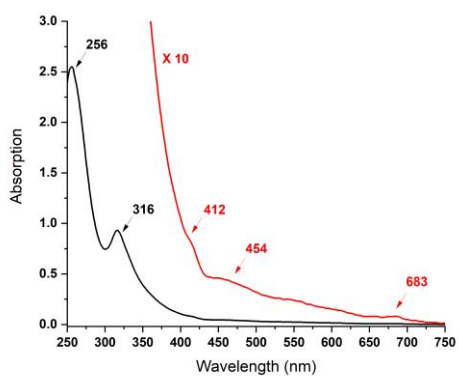

Figure S49. UV-vis absorption of compound 2l.

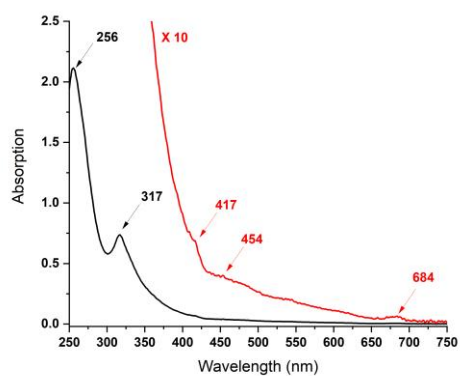

Figure S50. UV-vis absorption of compound 2m.



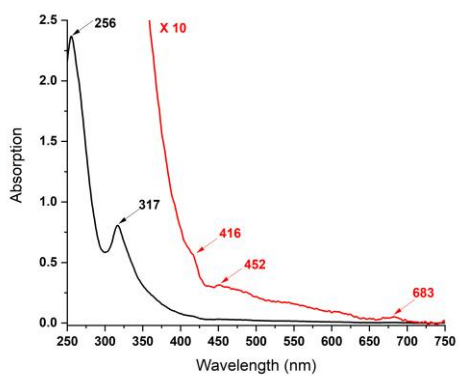

**Figure S51.** UV-vis absorption of compound **2n**.

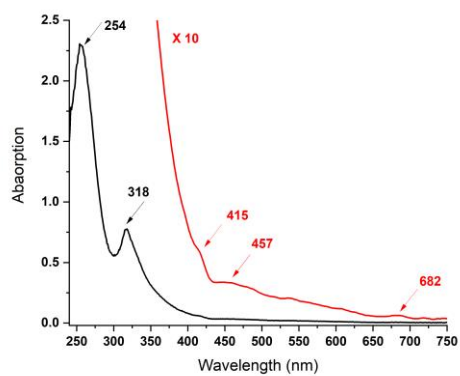

**Figure S52.** UV-vis absorption of compound **2o**.

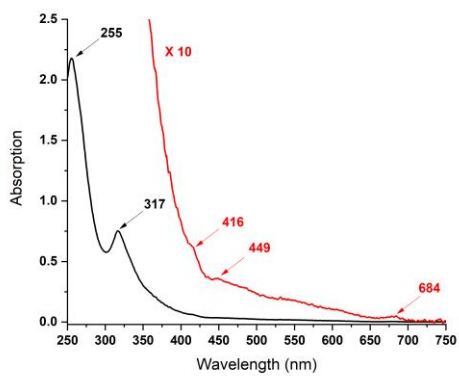

**Figure S53.** UV-vis absorption of compound **2r**.

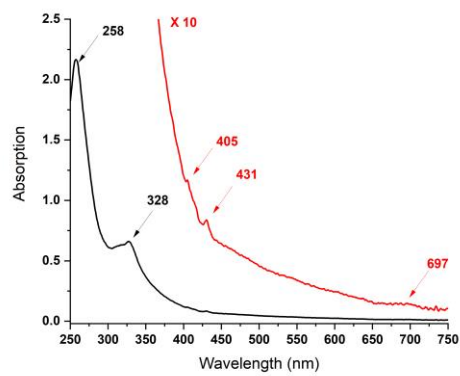

**Figure S54.** UV-vis absorption of compound **3a**.
